# Supplementary material for: To assemble or not to resemble—A validated Comparative Metatranscriptomics Workflow (CoMW)
Source: PubMed Central journal article supplement (PMC6667343; doi:10.1093/gigascience/giz096), 2019-07-30
Supplement: giz096_giga-d-19-00009_original_submission.pdf [file giz096_giga-d-19-00009_original_submission.pdf]

# GigaScience

## To assemble or not to resemble – benchmarking of metatranscriptomic practices and a validated Comparative Metatranscriptomics Workflow (CoMW) --Manuscript Draft--

|                                                      |                                                                                                                                                                                                                                                                                                                                                                                                                                                                                                                                                                                                                                                                                                                                                                                                                                                                                                                                                                                                                                                                                                                                                                                                                                                                                                                                                                                                                                                                                                                                                                                                                                                                                                                                                                                                                                                                                                                                                                                                                                                                                                       |                           |
|------------------------------------------------------|-------------------------------------------------------------------------------------------------------------------------------------------------------------------------------------------------------------------------------------------------------------------------------------------------------------------------------------------------------------------------------------------------------------------------------------------------------------------------------------------------------------------------------------------------------------------------------------------------------------------------------------------------------------------------------------------------------------------------------------------------------------------------------------------------------------------------------------------------------------------------------------------------------------------------------------------------------------------------------------------------------------------------------------------------------------------------------------------------------------------------------------------------------------------------------------------------------------------------------------------------------------------------------------------------------------------------------------------------------------------------------------------------------------------------------------------------------------------------------------------------------------------------------------------------------------------------------------------------------------------------------------------------------------------------------------------------------------------------------------------------------------------------------------------------------------------------------------------------------------------------------------------------------------------------------------------------------------------------------------------------------------------------------------------------------------------------------------------------------|---------------------------|
| <b>Manuscript Number:</b>                            | GIGA-D-19-00009                                                                                                                                                                                                                                                                                                                                                                                                                                                                                                                                                                                                                                                                                                                                                                                                                                                                                                                                                                                                                                                                                                                                                                                                                                                                                                                                                                                                                                                                                                                                                                                                                                                                                                                                                                                                                                                                                                                                                                                                                                                                                       |                           |
| <b>Full Title:</b>                                   | To assemble or not to resemble – benchmarking of metatranscriptomic practices and a validated Comparative Metatranscriptomics Workflow (CoMW)                                                                                                                                                                                                                                                                                                                                                                                                                                                                                                                                                                                                                                                                                                                                                                                                                                                                                                                                                                                                                                                                                                                                                                                                                                                                                                                                                                                                                                                                                                                                                                                                                                                                                                                                                                                                                                                                                                                                                         |                           |
| <b>Article Type:</b>                                 | Research                                                                                                                                                                                                                                                                                                                                                                                                                                                                                                                                                                                                                                                                                                                                                                                                                                                                                                                                                                                                                                                                                                                                                                                                                                                                                                                                                                                                                                                                                                                                                                                                                                                                                                                                                                                                                                                                                                                                                                                                                                                                                              |                           |
| <b>Funding Information:</b>                          | H2020 Marie Skłodowska-Curie Actions (675546)                                                                                                                                                                                                                                                                                                                                                                                                                                                                                                                                                                                                                                                                                                                                                                                                                                                                                                                                                                                                                                                                                                                                                                                                                                                                                                                                                                                                                                                                                                                                                                                                                                                                                                                                                                                                                                                                                                                                                                                                                                                         | Mr. Muhammad Zohaib Anwar |
| <b>Abstract:</b>                                     | <p>Background</p> <p>Metatranscriptomics has been used widely for investigation and quantification of microbial communities' activity in response to external stimuli. By assessing the genes expressed metatranscriptomics provides an understanding of the interactions between different major functional guilds and the environment. Metatranscriptomics typically utilize short sequence reads, which can either be directly aligned to external reference databases ("assembly-free approach") or first assembled into contigs before alignment ("assembly-based approach"). Here we compared workflows representing both alternatives, using simulated and real-world metatranscriptomes from Arctic and Temperate terrestrial environments. We evaluate their accuracy in precision and recall using generic and specialized hierarchical protein databases.</p> <p>Results</p> <p>We show that the assembly-based approach provides significantly fewer false positives resulting in more precise identification and quantification of functional genes in metatranscriptomes. Using the comprehensive database M5nr, the assembly-based approach identifies genes with only 0.6% false positives at thresholds ranging from inclusive to stringent compared to assembly-free approach (3.6 to 15% false positives). Using specialized databases (Carbohydrate Active-enzyme and Nitrogen Cycle) the assembly-based approach identifies and quantifies genes with 3-5x less false positives. We also evaluated the impact of both approaches on real-world datasets. Based on this benchmarking we present a standardized and optimized workflow for identifying functional genes from metatranscriptomes.</p> <p>Conclusions</p> <p>Our findings support the argument of assembling short reads into contigs before alignment to a reference database, since this provides higher precision and minimizes false positives. By virtue of the extensive benchmarking we also present the open source metatranscriptomics analysis workflow Comparative Metatranscriptomics Workflow CoMW.</p> |                           |
| <b>Corresponding Author:</b>                         | Muhammad Zohaib Anwar<br>Aarhus University<br>Roskilde, Copenhagen DENMARK                                                                                                                                                                                                                                                                                                                                                                                                                                                                                                                                                                                                                                                                                                                                                                                                                                                                                                                                                                                                                                                                                                                                                                                                                                                                                                                                                                                                                                                                                                                                                                                                                                                                                                                                                                                                                                                                                                                                                                                                                            |                           |
| <b>Corresponding Author Secondary Information:</b>   |                                                                                                                                                                                                                                                                                                                                                                                                                                                                                                                                                                                                                                                                                                                                                                                                                                                                                                                                                                                                                                                                                                                                                                                                                                                                                                                                                                                                                                                                                                                                                                                                                                                                                                                                                                                                                                                                                                                                                                                                                                                                                                       |                           |
| <b>Corresponding Author's Institution:</b>           | Aarhus University                                                                                                                                                                                                                                                                                                                                                                                                                                                                                                                                                                                                                                                                                                                                                                                                                                                                                                                                                                                                                                                                                                                                                                                                                                                                                                                                                                                                                                                                                                                                                                                                                                                                                                                                                                                                                                                                                                                                                                                                                                                                                     |                           |
| <b>Corresponding Author's Secondary Institution:</b> |                                                                                                                                                                                                                                                                                                                                                                                                                                                                                                                                                                                                                                                                                                                                                                                                                                                                                                                                                                                                                                                                                                                                                                                                                                                                                                                                                                                                                                                                                                                                                                                                                                                                                                                                                                                                                                                                                                                                                                                                                                                                                                       |                           |
| <b>First Author:</b>                                 | Muhammad Zohaib Anwar                                                                                                                                                                                                                                                                                                                                                                                                                                                                                                                                                                                                                                                                                                                                                                                                                                                                                                                                                                                                                                                                                                                                                                                                                                                                                                                                                                                                                                                                                                                                                                                                                                                                                                                                                                                                                                                                                                                                                                                                                                                                                 |                           |
| <b>First Author Secondary Information:</b>           |                                                                                                                                                                                                                                                                                                                                                                                                                                                                                                                                                                                                                                                                                                                                                                                                                                                                                                                                                                                                                                                                                                                                                                                                                                                                                                                                                                                                                                                                                                                                                                                                                                                                                                                                                                                                                                                                                                                                                                                                                                                                                                       |                           |
| <b>Order of Authors:</b>                             | Muhammad Zohaib Anwar                                                                                                                                                                                                                                                                                                                                                                                                                                                                                                                                                                                                                                                                                                                                                                                                                                                                                                                                                                                                                                                                                                                                                                                                                                                                                                                                                                                                                                                                                                                                                                                                                                                                                                                                                                                                                                                                                                                                                                                                                                                                                 |                           |

|                                                                                                                                                                                                                                                                                                                                                                                                                                                                                                                                     |                       |
|-------------------------------------------------------------------------------------------------------------------------------------------------------------------------------------------------------------------------------------------------------------------------------------------------------------------------------------------------------------------------------------------------------------------------------------------------------------------------------------------------------------------------------------|-----------------------|
|                                                                                                                                                                                                                                                                                                                                                                                                                                                                                                                                     | Anders Lanzen         |
|                                                                                                                                                                                                                                                                                                                                                                                                                                                                                                                                     | Toke Bang-Andreasen   |
|                                                                                                                                                                                                                                                                                                                                                                                                                                                                                                                                     | Carsten Suhr Jacobsen |
| <b>Order of Authors Secondary Information:</b>                                                                                                                                                                                                                                                                                                                                                                                                                                                                                      |                       |
| <b>Additional Information:</b>                                                                                                                                                                                                                                                                                                                                                                                                                                                                                                      |                       |
| <b>Question</b>                                                                                                                                                                                                                                                                                                                                                                                                                                                                                                                     | <b>Response</b>       |
| Are you submitting this manuscript to a special series or article collection?                                                                                                                                                                                                                                                                                                                                                                                                                                                       | No                    |
| <p><b>Experimental design and statistics</b></p> <p>Full details of the experimental design and statistical methods used should be given in the Methods section, as detailed in our <a href="#">Minimum Standards Reporting Checklist</a>. Information essential to interpreting the data presented should be made available in the figure legends.</p> <p>Have you included all the information requested in your manuscript?</p>                                                                                                  | Yes                   |
| <p><b>Resources</b></p> <p>A description of all resources used, including antibodies, cell lines, animals and software tools, with enough information to allow them to be uniquely identified, should be included in the Methods section. Authors are strongly encouraged to cite <a href="#">Research Resource Identifiers</a> (RRIDs) for antibodies, model organisms and tools, where possible.</p> <p>Have you included the information requested as detailed in our <a href="#">Minimum Standards Reporting Checklist</a>?</p> | Yes                   |
| <p><b>Availability of data and materials</b></p> <p>All datasets and code on which the conclusions of the paper rely must be either included in your submission or deposited in <a href="#">publicly available repositories</a> (where available and ethically</p>                                                                                                                                                                                                                                                                  | Yes                   |

appropriate), referencing such data using a unique identifier in the references and in the “Availability of Data and Materials” section of your manuscript.

Have you have met the above requirement as detailed in our [Minimum Standards Reporting Checklist](#)?

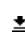

1  
2  
3  
4  
5  
6  
7  
8  
9  
10  
11  
12  
13  
14  
15  
16  
17  
18  
19  
20  
21  
22  
23  
24  
25  
26  
27  
28  
29  
30  
31  
32  
33  
34  
35  
36  
37  
38  
39  
40  
41  
42  
43  
44  
45  
46  
47  
48  
49  
50  
51  
52  
53  
54  
55  
56  
57  
58  
59  
60  
61  
62  
63  
64  
65

1 **To assemble or not to resemble – benchmarking of metatranscriptomic practices and a**  
2 **validated Comparative Metatranscriptomics Workflow (CoMW)**

3

4 **Authors**

5 Muhammad Zohaib Anwar<sup>1\*</sup>

6 Anders Lanzen<sup>2,3</sup>

7 Toke Bang-Andreasen<sup>1,4</sup>

8 Carsten Suhr Jacobsen<sup>1\*</sup>

9

10 **Author Affiliations**

11 1 Department of Environmental Science, Aarhus University RISØ Campus, Frederiksborgvej 399,

12 4000 Roskilde, Denmark

13 2 AZTI, Herrera Kaia, Pasaia, Spain

14 3 IKERBASQUE, Basque Foundation for Science, 48011 Bilbao, Spain

15 4 Department of Biology, University of Copenhagen, Copenhagen, Denmark

16

17 **\*Corresponding Authors:**

18 Muhammad Zohaib Anwar: [mzanwar@envs.au.dk](mailto:mzanwar@envs.au.dk)

19 Carsten Suhr Jacobsen: [csj@envs.au.dk](mailto:csj@envs.au.dk)

1  
2  
3  
4  
5  
6  
7  
8  
9  
10  
11  
12  
13  
14  
15  
16  
17  
18  
19  
20  
21  
22  
23  
24  
25  
26  
27  
28  
29  
30  
31  
32  
33  
34  
35  
36  
37  
38  
39  
40  
41  
42  
43  
44  
45  
46  
47  
48  
49  
50  
51  
52  
53  
54  
55  
56  
57  
58  
59  
60  
61  
62  
63  
64  
65

20 **Abstract**

21 **Background**

22 Metatranscriptomics has been used widely for investigation and quantification of microbial  
23 communities' activity in response to external stimuli. By assessing the genes expressed  
24 metatranscriptomics provides an understanding of the interactions between different major  
25 functional guilds and the environment. Metatranscriptomics typically utilize short sequence  
26 reads, which can either be directly aligned to external reference databases ("assembly-free  
27 approach") or first assembled into contigs before alignment ("assembly-based approach"). Here  
28 we compared workflows representing both alternatives, using simulated and real-world  
29 metatranscriptomes from Arctic and Temperate terrestrial environments. We evaluate their  
30 accuracy in precision and recall using generic and specialized hierarchical protein databases.

31 **Results**

32 We show that the assembly-based approach provides significantly fewer false positives resulting  
33 in more precise identification and quantification of functional genes in metatranscriptomes.  
34 Using the comprehensive database M5nr, the assembly-based approach identifies genes with  
35 only 0.6% false positives at thresholds ranging from inclusive to stringent compared to assembly-  
36 free approach (3.6 to 15% false positives). Using specialized databases (Carbohydrate Active-  
37 enzyme and Nitrogen Cycle) the assembly-based approach identifies and quantifies genes with  
38 3-5x less false positives. We also evaluated the impact of both approaches on real-world datasets.  
39 Based on this benchmarking we present a standardized and optimized workflow for identifying  
40 functional genes from metatranscriptomes.

41 **Conclusions**

1  
2  
3  
4  
5  
6  
7  
8  
9  
10  
11  
12  
13  
14  
15  
16  
17  
18  
19  
20  
21  
22  
23  
24  
25  
26  
27  
28  
29  
30  
31  
32  
33  
34  
35  
36  
37  
38  
39  
40  
41  
42  
43  
44  
45  
46  
47  
48  
49  
50  
51  
52  
53  
54  
55  
56  
57  
58  
59  
60  
61  
62  
63  
64  
65

42 Our findings support the argument of assembling short reads into contigs before alignment to a  
43 reference database, since this provides higher precision and minimizes false positives. By virtue  
44 of the extensive benchmarking we also present the open source metatranscriptomics analysis  
45 workflow Comparative Metatranscriptomics Workflow *CoMW*.

1  
2  
3  
4  
5  
6  
7  
8  
9  
10  
11  
12  
13  
14  
15  
16  
17  
18  
19  
20  
21  
22  
23  
24  
25  
26  
27  
28  
29  
30  
31  
32  
33  
34  
35  
36  
37  
38  
39  
40  
41  
42  
43  
44  
45  
46  
47  
48  
49  
50  
51  
52  
53  
54  
55  
56  
57  
58  
59  
60  
61  
62  
63  
64  
65

46 **Key Words**

47 Metatranscriptomics, Benchmarking, Assembly, Alignment, Precision, Recall, False positives

48 **1. Introduction**

49 Metatranscriptomics provides an unprecedented insight to complex functional dynamics of  
50 microbial communities in various environments. The method has been applied to study the  
51 microbial activity in thawing permafrost and the related biogeochemical mechanisms  
52 contributing to greenhouse gas emissions [1], and Gonzalez *et al.* [2] applied metatranscriptomics  
53 to evaluate root microbiome response to soil contamination. The method is typically used to  
54 identify, quantify and compare the functional response of microbial communities in natural  
55 habitats or in relation to environmental or physio-chemical impacts.

56 Using high-throughput sequencing techniques such as Illumina, metatranscriptomics offers a non  
57 PCR biased method for looking at transcriptional activity occurring within a complex and diverse  
58 microbial population at a specific point in time [3]. However, curation and annotation of this  
59 complex data has emerged as a major challenge. To date, several studies have used various  
60 analytic workflows. Typically, short sequence reads are utilized, which can either be individually  
61 aligned directly to external reference databases (hereafter “assembly-free”) or assembled into  
62 longer contiguous fragments (contigs) for alignment (hereafter “assembly-based”). Various  
63 studies have used either of these two general approaches. For example, Jung *et al.* [4] used an  
64 assembly-free approach (with BWA [5] to map reads to reference genomes of lactic acid bacterial  
65 strains associated with the kimchi microbial community) while Poulsen *et al.* [6] used an  
66 assembly-based approach (using SHE-RA [7] assembly before aligning to protein database).  
67 Similarly, an open source pipeline developed by Martinez *et al.* [8] to analyze

1  
2  
3  
4  
5  
6  
7  
8  
9  
10  
11  
12  
13  
14  
15  
16  
17  
18  
19  
20  
21  
22  
23  
24  
25  
26  
27  
28  
29  
30  
31  
32  
33  
34  
35  
36  
37  
38  
39  
40  
41  
42  
43  
44  
45  
46  
47  
48  
49  
50  
51  
52  
53  
54  
55  
56  
57  
58  
59  
60  
61  
62  
63  
64  
65

68 metatranscriptomics data-sets also aligns short reads directly to the M5nr database [9] and  
69 provides eggNOG annotation [10]. Most of the studies have used an assembly-free approach  
70 [11] due to less computational expense in addition to lack of thorough comparison available.  
71 Since no independent and direct comparison between these two alternative approaches has  
72 been performed presently, various metatranscriptomics analysis approaches may at times  
73 produce inconsistent observations, even if identical databases are used in the analysis. Thus,  
74 standardization of computational analysis is necessary to enable further propagation of  
75 metatranscriptomics approaches and their integration into microbial ecology research.  
76 Benchmarking provides a critical view of the efficiency and precision of different workflows and  
77 use of simulated communities for benchmarking enables the analysis to be independent of  
78 experimental variation and biases [12].  
79 Here, we compared the assembly-free vs. assembly-based approach using simulated datasets.  
80 We evaluated the accuracy of both approaches using precision, recall and False Discovery Rates  
81 (FDR) with three different databases ranging from a generic or inclusive to specialized database  
82 dedicated to structurally or functionally related functional families: 1) M5nr: an inclusive and  
83 comprehensive non-redundant protein database in combination with eggNOG hierarchical  
84 annotation 2) Carbohydrate-Active Enzymes (CAZymes) [13]: a database dedicated to describing  
85 the families of structurally-related catalytic and carbohydrate-binding modules of enzymes and  
86 3) Nitrogen Cycling Database (NCycDB) [14] a specialized and manually curated database  
87 covering only N cycle genes. In order to estimate the consistency and variance in the results  
88 caused by the choice of approach we then applied them to real world metatranscriptomes from  
89 microbial communities in 1) active-layer permafrost soil from Svalbard and 2) Ash impacted



1  
2  
3  
4  
5  
6  
7  
8  
9  
10  
11  
12  
13  
14  
15  
16  
17  
18  
19  
20  
21  
22  
23  
24  
25  
26  
27  
28  
29  
30  
31  
32  
33  
34  
35  
36  
37  
38  
39  
40  
41  
42  
43  
44  
45  
46  
47  
48  
49  
50  
51  
52  
53  
54  
55  
56  
57  
58  
59  
60  
61  
62  
63  
64  
65

90 Danish Forest soil. With the help of this comprehensive benchmarking and comparative analysis  
91 we then standardized and developed an open source Comparative Metatranscriptomic Workflow  
92 (CoMW).

## 94 **2. Findings**

### 95 **2.1 Evaluation**

96 In order to compare the performance of the assembly-based and assembly-free approaches, and  
97 to standardize a workflow using either of these, we simulated community transcript data using  
98 4943 full length genes provided by Martinez et al. [8]. We analyzed both approaches separately  
99 and compared against direct annotation of full-length genes. The full-length genes were  
100 annotated using all three databases (M5nr, CAZy and NCycDB) independently to classify them  
101 into functional subsystems and gene families. Figure 1 shows detailed workflow of comparative  
102 analysis using both approaches.

104 *Figure 1: Flowchart illustrating the benchmarking scheme used for comparison of approaches. Red path indicates*  
105 *the full-length genes workflow, Green indicates the steps in assembly-based and Blue indicates the steps in the*  
106 *assembly-free approach.*

#### 108 **2.1.1 Functional assignment**

##### 109 **2.1.1.1 M5nr Alignment**

110 Full length genes of the simulated community dataset were aligned and identified into 671  
111 unique eggNOG orthologs, belonging to 19 distinct functional subsystems (level II). At the default  
112 confidence threshold (BTS score 50) of Diamond [15], assembly-free approach produced  
113 alignments to 820 orthologs with a precision of 85% (14.9% FPs), whereas the assembly-based

1  
2  
3  
4  
5  
6  
7  
8  
9  
10  
11  
12  
13  
14  
15  
16  
17  
18  
19  
20  
21  
22  
23  
24  
25  
26  
27  
28  
29  
30  
31  
32  
33  
34  
35  
36  
37  
38  
39  
40  
41  
42  
43  
44  
45  
46  
47  
48  
49  
50  
51  
52  
53  
54  
55  
56  
57  
58  
59  
60  
61  
62  
63  
64  
65

114 approach identified 665 orthologs with a precision of 99.3% (0.6% FPs) at the default SWORD  
115 [16] confidence threshold of 1E-5. Repeating the alignments using a gradient of 15 varying  
116 confidence thresholds for each approach (Low -  $T_L$ , Medium -  $T_M$  and High -  $T_H$ ; 5 thresholds /  
117 category) resulted in dissimilar performance for both approaches. The precision and recall of  
118 assembly-based approach did not change from 99.3% and 98.5% respectively throughout all  
119 categories whereas the assembly-free approach had a maximum precision of 96.3% at  $T_M$  and  
120 decreases to 85% at  $T_L$  and  $T_H$ . The assembly-based approach also produced fewer (only 0.6%)  
121 FPs consistently compared to assembly-free approach of FPs ranging from 14.9% to minimum  
122 3.6% at highest precision. Based on F-Score the most optimal alignment for each approach is  
123 given in Table 1, whereas detailed values for precision, recall, F-Score and FDR are listed in  
124 Supplementary Table S1. We then also evaluated both approaches by selectively removing  
125 sequences belonging to a certain functional subsystem from the M5nr database in a controlled  
126 manner (segmented cross validation) in order to replicate real world metatranscriptomes where  
127 a certain functional subsystem can be completely or partially absent from the reference  
128 database. We removed four (level II) subsystems (“[D] Cell cycle control, cell division,  
129 chromosome partitioning”; “[L] Replication, recombination and repair”; “[E] Amino acid  
130 transport and metabolism” and “[R] General function prediction only” and “[S] Function  
131 unknown”). The level II subsystems were removed one at a time realigning full-length genes and  
132 simulated reads using both Assembly-based and assembly-free approaches to the cropped  
133 database to compare identification consistency. In each validation round, the number of unique  
134 (eggNOG) orthologs identified by the assembly-based approach were consistent to full length

135 gene alignment whereas from the assembly-free approach, the orthologs dropped significantly  
 136 along with its ability to recall TPs. Table 2 provides details for each validation cycle.

137

138 *Table 1 : Mean of Precision, Recall and F Score for both approaches against all three databases. Bold emphasizes better*  
 139 *precision, recall, F-Score and FDR in each category across approaches*

| Databases | Approach       | Threshold       | Threshold Category | Recall        | Precision     | F-Score       | FDR (%)        |
|-----------|----------------|-----------------|--------------------|---------------|---------------|---------------|----------------|
| eggNOG    | Assembly-free  | <i>BTS 120</i>  | <i>Strict [TH]</i> | <b>0.9880</b> | 0.9540        | 0.9707        | 4.5977         |
|           | Assembly-based | <i>1.00E-15</i> | <i>Strict [TH]</i> | 0.9851        | <b>0.9939</b> | <b>0.9895</b> | <b>0.6006</b>  |
| CAZy      | Assembly-free  | <i>BTS 110</i>  | <i>Strict [TH]</i> | 0.3510        | 0.5325        | 0.4231        | 46.7433        |
|           | Assembly-based | <i>1.00E-08</i> | <i>Medium [TM]</i> | <b>0.8131</b> | <b>0.7759</b> | <b>0.7940</b> | <b>22.4096</b> |
| NCycDB    | Assembly-free  | <i>BTS150</i>   | <i>Strict [TH]</i> | 0.1666        | 0.0581        | 0.0862        | 94.1860        |
|           | Assembly-based | <i>1.00E-14</i> | <i>Strict [TH]</i> | <b>0.6666</b> | <b>0.8333</b> | <b>0.7407</b> | <b>16.6666</b> |

140

141 *Table 2 Selective removal of functional subsystems from eggnog database (segmented cross-validation) of approaches. Bold*  
 142 *emphasizes better consistency across approaches*

| Complete Database | Full Length Genes<br>Unique Orthologs |        | Unique orthologs from the<br>assembly-free approach |        | Unique Orthologs from the<br>Assembly-based approach |               |
|-------------------|---------------------------------------|--------|-----------------------------------------------------|--------|------------------------------------------------------|---------------|
|                   | 671                                   |        | 784                                                 |        | 667                                                  |               |
| [D] removed       | 628                                   | 93.59% | 572                                                 | 72.95% | <b>624</b>                                           | <b>93.55%</b> |
| [L] removed       | 640                                   | 95.38% | 584                                                 | 74.48% | <b>636</b>                                           | <b>95.35%</b> |
| [E] removed       | 640                                   | 95.38% | 583                                                 | 74.36% | <b>636</b>                                           | <b>95.35%</b> |
| [R], [S] removed  | 347                                   | 51.7%  | 334                                                 | 42.60% | <b>352</b>                                           | <b>52.77%</b> |

143

#### 144 **2.1.1.2 CAZY Alignment**

145 Out of a total 2395 full length genes, 500 sequences were aligned to 395 unique functional genes  
 146 in the CAZY database, which belonged to 130 gene families and were further classified as 7  
 147 enzyme classes. Using default confidence thresholds (BTS 50 & 1E-5), the assembly-free approach  
 148 identified 765 functional genes belonging to 112 unique families and 6 enzyme classes with a  
 149 precision of 28.5% (71.4% FPs). The assembly-based approach identified 488 functional genes  
 150 from CAZY database that were classified into 147 gene families from 7 enzyme classes with a  
 151 precision of 66% (FDR 33.9%) at the default confidence threshold. However, when we repeated

1  
2  
3  
4  
5  
6  
7  
8  
9  
10  
11  
12  
13  
14  
15  
16  
17  
18  
19  
20  
21  
22  
23  
24  
25  
26  
27  
28  
29  
30  
31  
32  
33  
34  
35  
36  
37  
38  
39  
40  
41  
42  
43  
44  
45  
46  
47  
48  
49  
50  
51  
52  
53  
54  
55  
56  
57  
58  
59  
60  
61  
62  
63  
64  
65

152 the process with 15 various confidence thresholds, precision improved consistently for the  
153 assembly-based approach and FPs decreased, whereas for assembly-free approach, precision  
154 dropped significantly with increasing confidence threshold (see Table 1 and Supplementary Table  
155 S2).

156 **2.1.1.3 *NCycDB Alignment***

157 410 of 2395 full length genes aligned to this database, identified as 29 unique Nitrogen cycle  
158 genes and further belonging to 15 functional gene families in 5 pathways. Using default  
159 confidence thresholds, the assembly-free approach identified 1541 functional genes belonging  
160 to 25 functional gene families classified into 6 pathways with a precision of 0.9% (99% FPs). The  
161 assembly-based approach identified 42 Nitrogen cycle genes classified into 25 gene families from  
162 6 pathways with a precision of 59.5% (40.4% FPs) at a default confidence threshold of 1E-5. Like  
163 comparisons against M5nr and CAZY we repeated the process with 15 different confidence  
164 thresholds for each approach. Precision improved significantly for the assembly-based approach  
165 at stringent thresholds whereas for the assembly-free approach, the best precision achieved was  
166 5.8%. (Table 1, Supplementary Table S3).

167 **2.1.2 *Expression Quantification***

168 We also compared the ability of both approaches to quantify the expression of identified  
169 transcripts by performing differential expression analysis of two groups in simulated  
170 communities and compared against the full-length gene expression simulated. We selected three  
171 best identification thresholds for both approaches based on highest F-Score and performed  
172 differential expression analysis using DESeq2 [16] algorithm in SARTools [17]. This analysis for  
173 both approaches was carried out against all three databases using the most specific level of

1  
2  
3  
4 174 hierarchy in the respective databases in order to capture their ability to quantify expression levels  
5  
6  
7 175 of specific genes. According to full-length gene alignments against eggNOG, 123 genes were  
8  
9  
10 176 significantly upregulated and 270 were significantly downregulated. Using assembly-free  
11  
12 177 approach with best F-Score 73 genes were up-regulated (precision 94.5%, 5.4% FPs) and 380  
13  
14 178 (precision 65.7%, 34.2% FPs) were down regulated. whereas in the assembly-based approach 99  
15  
16  
17 179 (precision 94.9%, 5% FPs) genes were up-regulated and 249 (precision 97.1%, 2.8% FPs) down  
18  
19  
20 180 regulated. For CAZy database full-length genes 81 and 189 genes were significantly up and down  
21  
22  
23 181 regulated respectively. Using assembly-free approach 31 (precision 19.3%, 80.6% FPs) genes  
24  
25 182 significantly up regulated and 137 genes (precision 52.5%, 47.4% FPs) whereas the assembly-  
26  
27  
28 183 based approach 83 (precision 71%, 28.9% FPs) genes were up-regulated and 191 (precision  
29  
30 184 73.8%, 26.1% FPs) genes were down regulated. In the NCyc database expression analysis, 3 and  
31  
32  
33 185 14 genes were significantly up and down-regulated respectively. Using assembly-free approach  
34  
35 186 26 (precision 0%, 100% FPs) and 107 (precision 4.6%, 95.3% FPs) genes up and down regulated  
36  
37  
38 187 respectively, whereas using assembly-based approach 3 (precision 33.3%, 66.6% FPs) genes up  
39  
40  
41 188 regulated and 18 (precision 55.5%, 44% FPs) were down regulated. Precision, Recall and FDR for  
42  
43 189 both approaches against all three databases are available in Supplementary Table S4.  
44  
45  
46 190 Additionally, we then collapsed the functional genes into functional subsystems and gene  
47  
48 191 families to remove FPs produced due to identification of homologous proteins or proteins with  
49  
50  
51 192 multiple inheritance. Fold change (log<sub>2</sub> transformed) was then calculated for each  
52  
53 193 subsystem/gene family. (see Figure 3)  
54  
55  
56 194

57  
58 195 *Figure 2: Differential Expression comparison of Assembly-free and Assembly-based approaches using A) M5nr*  
59 196 *database, B) NCycDB and C) CAZy database.*

1  
2  
3  
4 197

5  
6 198 **2.1.3 Real-World metatranscriptomes**

7  
8  
9 199 To evaluate the effect of the two approaches on real world data, two metatranscriptomes from  
10  
11 200 microbial communities were studied. The first study investigated the transcriptional response  
12  
13  
14 201 during warming from -10 °C to 2 °C and subsequent cooling of 2 °C to -10 °C of an Arctic tundra  
15  
16 202 active layer soil from Svalbard, Norway . The aim of the study was to understand taxonomic and  
17  
18  
19 203 functional shifts in microbial communities caused by climate change in the Arctic. A pronounced  
20  
21  
22 204 shift during the incubation period was noticed by Schostag *et al.* [17] (under review Molecular  
23  
24 205 Ecology, SRA Bio-Project: PRJNA417839) which was not replicated by the assembly-free  
25  
26  
27 206 approach. However, the assembly-based approach identified an increase of genes in “[P]  
28  
29 207 Inorganic ion transport and metabolism”. For cooling, the assembly-based approach also  
30  
31  
32 208 captured the upregulation and downregulation of genes related to “[J] Translation, ribosomal  
33  
34 209 structure and biogenesis” and “[C] Energy production and conversion” respectively (Figure 6)  
35  
36  
37 210 unlike assembly-free approach. These findings may have implications for our understanding of  
38  
39  
40 211 carbon dioxide emission, nitrogen cycling and plant nutrient availability in Arctic soils.

41  
42 212

43  
44  
45 213 *Figure 3: Functional expression dynamics in Arctic permafrost soil identified against eggNOG functional subsystems*  
46 214 *using Assembly-based and Assembly-free approach*

47  
48 215

49  
50  
51 216 In the second study, Bang-Andreasen *et al.* [18] (under review ISME, SRA Bio-Project:  
52  
53 217 PRJNA512608) investigated the effects of wood ash amendment on Danish forest soils. Ash was  
54  
55  
56 218 added in 3 different quantities (0/control, 3, 12 and 90 tonnes ash per hectare (t ha<sup>-1</sup>)). In addition  
57  
58  
59 219 to ash concentration, the effect over time was analysed in soil communities at 0, 3, 30 and 100

1  
2  
3  
4  
5  
6  
7  
8  
9  
10  
11  
12  
13  
14  
15  
16  
17  
18  
19  
20  
21  
22  
23  
24  
25  
26  
27  
28  
29  
30  
31  
32  
33  
34  
35  
36  
37  
38  
39  
40  
41  
42  
43  
44  
45  
46  
47  
48  
49  
50  
51  
52  
53  
54  
55  
56  
57  
58  
59  
60  
61  
62  
63  
64  
65

220 days after ash addition. This resulted in strong effects on functional expression as seen in Figure  
221 7. Both approaches once again displayed varying results such as changes in genes related to  
222 eggNOG functional subsystem “[W] Extracellular structures”. Assembly-free approach also  
223 identified 75% of genes as “[S] Function unknown” consistently unlike assembly-based.

224

225 *Figure 4: Functional expression dynamics in Danish forest soil due to Ash amendment and time elapsed, identified*  
226 *against eggNOG functional subsystems using Assembly-based and Assembly-free approach*

227

228 **2.2 Standardized Workflow (CoMW)**

229 By the virtue of thorough benchmarking we standardized, implemented, and validated a  
230 metatranscriptomic workflow (CoMW) using Assembly-based approach. The workflow was  
231 implemented by keeping in mind the databases and tools for each step are ever improving thus  
232 optional steps can be skipped, changed or even improved in a structural manner. CoMW is open  
233 source workflow written in python available at (<https://github.com/anwarMZ/CoMW>). It is based  
234 on four major steps: 1) Assembly and Mapping short reads to assembled contigs; 2) Filtering of  
235 contigs; 3) Gene Prediction and Alignment and 4) Annotation. These scripts make each step of  
236 the workflow straightforward and help to make these complex analyses more reproducible and  
237 the components re-useable in different contexts. Help regarding input, output and parameters is  
238 provided with each script and an overall tutorial is presented in the data repository at GitHub.  
239 We here wanted to build an open source work flow for metatranscriptomics analysis that can  
240 assist in analyzing large metatranscriptomics data. Processes like ORF detection, alignment  
241 against the database and calculations of the gene expression are vital in any metatranscriptomic  
242 analyses and are, therefore, present uniformly in all workflows. However, since we use the

1  
2  
3  
4  
5  
6  
7  
8  
9  
10  
11  
12  
13  
14  
15  
16  
17  
18  
19  
20  
21  
22  
23  
24  
25  
26  
27  
28  
29  
30  
31  
32  
33  
34  
35  
36  
37  
38  
39  
40  
41  
42  
43  
44  
45  
46  
47  
48  
49  
50  
51  
52  
53  
54  
55  
56  
57  
58  
59  
60  
61  
62  
63  
64  
65

243 assembly-based workflow where we assemble the reads into longer contigs we also propose a 2-  
244 step filtering of the contigs to remove any chimeric or false contig made as a result of assembly  
245 or sequencing error by removing contigs that have an expression level less than a specific  
246 threshold and to remove any potential non-coding RNA contigs assembled.

247 *Assembly and Mapping of short reads back to assembled contigs* is done using Trinity [19] and  
248 BWA [5] respectively. Various tools have been developed for metatranscriptome reconstruction  
249 that usually rely on graph-theory. Trinity however generates the most optimal assemblies for  
250 coding RNA reads [11,20,21]. However, the user can generate contigs by any assembler preferred  
251 but it can reduce the quality of the following steps such as alignment of contigs.

252 *Filtering of Contigs* is done to remove variance in sequences/samples. We can filter contig  
253 abundance data by removing all contigs with relative expression lower than a specific cutoff, e.g.  
254 1% (selected based on dataset variance) of the number of sequences in the dataset with least  
255 number of sequences. This threshold is also flexible for different datasets and in some cases not  
256 required at all so CoMW allows user to bypass this step or change the threshold up and down  
257 based on data variation. The filtered contigs are subject to potential non-coding RNA filtration by  
258 aligning them against the RFam database [22] using infernal [23] which is a secondary-structure-aware  
259 aligner that predicts the secondary structure of RNA sequences and similarities based on the consensus  
260 structure models. Once again, the ncRNA filtering is an optional step in CoMW, though highly  
261 recommended in order to reduce FPs.

262 *Gene Prediction and Alignment* Transeq from EMBOSS [24] is used to predict probable open  
263 reading frames (ORFs) of the contigs (customizable, by default 6 per contig). We used SWORD  
264 [16] as alignment tool against reference databases. SWORD can be used in parallel based on



1  
2  
3  
4 265 computational resources available and the aligned results are parsed and cut-off at a specific  
5  
6  
7 266 confidence threshold of combination of e-value and alignment length (usually 1e-5, can be  
8  
9  
10 267 changed given the assembly distribution in datasets).  
11  
12 268 *Annotation* of aligned transcripts from the previous step can be done using the databases such  
13  
14  
15 269 as eggNOG which is a hierarchically structured annotation using a graph-based unsupervised  
16  
17  
18 270 clustering available algorithm to produce genome wide orthology inferences. Aligned proteins  
19  
20  
21 271 are then placed into functional subsystems based on their best hits.), CAZy which is a knowledge-  
22  
23  
24 272 based resource specialized in the Glycogenomics, and NCycDB; a Nitrogen cycle database. This results  
25  
26  
27 273 in a count table with a contig and eggNOG ortholog or CAZY gene or NCyc gene having a certain  
28  
29  
30 274 count from each sample depending upon database used. This count table can be then used for  
31  
32  
33 275 differential expression using state-of-the-art expression analysis.  
34  
35  
36 276 CoMW is based on the results and findings from comparison of approaches. However, it has  
37  
38  
39 277 multiple optional steps such as abundance based and non-coding RNA filtering which can be  
40  
41  
42 278 different in data sets from a different environment. Similarly, the scripts are designed to cater  
43  
44  
45 279 more than one assembler output to enable diverse range of environments to be studied.  
46  
47  
48 280

### 281 **3 Discussion**

48 282 The application of metatranscriptomics is less common than other DNA-based genomics  
49  
50  
51 283 techniques and thus most analysis pipelines are built ad hoc. The majority of these pipelines  
52  
53  
54 284 follow the assembly-free approach [11] such as COMAN [25], Metatrans [8], and SAMSA2 [26].  
55  
56  
57 285 The lack of thorough benchmarking studies and standardized workflows in metatranscriptomics  
58  
59  
60 286 has made it a more challenging task to analyze the typically big datasets produced. Previous  
61  
62  
63  
64  
65

1  
2  
3  
4  
5  
6  
7  
8  
9  
10  
11  
12  
13  
14  
15  
16  
17  
18  
19  
20  
21  
22  
23  
24  
25  
26  
27  
28  
29  
30  
31  
32  
33  
34  
35  
36  
37  
38  
39  
40  
41  
42  
43  
44  
45  
46  
47  
48  
49  
50  
51  
52  
53  
54  
55  
56  
57  
58  
59  
60  
61  
62  
63  
64  
65

287 studies have compared *de novo* sequence assemblers including Trinity, MetaVelvet [27],  
288 Oases[28], AbySS [29] and SOAPden-ovo [30] but an independent comparison of the two  
289 different approaches based on including assembly or directly aligning reads (here “assembly-  
290 free”) has been lacking. We have attempted to assist this decision-making for processing  
291 metatranscriptomic analysis by independently assessing the performance of the two for  
292 functional annotation and expression quantification against three databases ranging from  
293 inclusive to specialized.

294 With simulated samples comprised of genes collected from abundant genomes provided by  
295 Martinez *et al.* [8] we show that both approaches provide high recall rates against the general  
296 comprehensive database M5nr. However, the assembly-based approach provided a significantly  
297 better precision for identification and quantification. For relatively compact and specialized  
298 databases, recall and precision drop for both approaches (especially for the most compact  
299 database NCyc). However, the assembly-based approach still appeared to be more precise,  
300 meaning that fewer genes were mis-assigned against these database and significantly lower FPs  
301 were produced. The precision in identification and expressional fold change comparison of gene  
302 families and functional subsystems for simulated samples against all three databases confirmed  
303 that while an assembly step is challenging computationally it holds the potential to reveal  
304 information regarding the gene expressions that is not attainable without it.

305 Selecting a single best workflow or pipeline for all types of metatranscriptomics studies is not a  
306 straightforward affair, and we believe that choice of approach changes the outcome of study  
307 significantly as observed with real-world datasets from active-layer permafrost soil from Svalbard  
308 and Ash impacted Danish Forest soil. In addition to choosing the right workflow, combining that

1  
2  
3  
4 309 with the appropriate reference database is equally important to ensure the best annotation  
5  
6  
7 310 performance. With databases specialized for one or more specific environments or functional  
8  
9  
10 311 categories assembly-free approach underperforms due to its inability to identify conserved  
11  
12 312 sequences in reference database. We also show that assembly-free approach can increase the  
13  
14  
15 313 rate of FPs in annotation when a database is dominant in specific functional subsystem or does  
16  
17 314 not possess certain category which can also lead to wrong estimation of fold change in expression  
18  
19  
20 315 In summary, we show that the choice of approach (assembly-free or assembly-based) and  
21  
22 316 database significantly affects the quality of the identification, annotation and expression results.  
23  
24  
25 317 Given the impact of each of these variables, it is inevitable that it significantly affects the results  
26  
27  
28 318 of an individual study and comparison of across studies. By standardizing and developing CoMW  
29  
30 319 we believe our work presented here further assists the microbial ecology research community to  
31  
32  
33 320 make more informed decisions about the most appropriate methodological approach to analyze  
34  
35 321 large metatranscriptomic datasets with improved precision.  
36  
37

38 322

## 41 323 **4 Methods**

42  
43  
44 324 For the assembly-free approach we used the Metatrans pipeline [8], which uses FragGeneScan  
45  
46 325 [31] for ORF predictions in short reads, CD-Hit [32] for gene clustering and Diamond [15] for  
47  
48  
49 326 alignment to the M5nr database. For assembly-based approach we assembled the simulated  
50  
51  
52 327 short reads using Trinity [19] which has been studied to outperform other de novo RNA-seq  
53  
54 328 assemblers and aligned the resulting contigs using SWORD (an efficient protein database search  
55  
56  
57 329 implementation especially optimized for large databases) [16] against the M5nr [9], CAZy [13]  
58  
59 330 and NCyc [14] database. We then wrote an annotation script which is included in CoMW. For  
60  
61  
62  
63  
64  
65

1  
2  
3  
4  
5  
6  
7  
8  
9  
10  
11  
12  
13  
14  
15  
16  
17  
18  
19  
20  
21  
22  
23  
24  
25  
26  
27  
28  
29  
30  
31  
32  
33  
34  
35  
36  
37  
38  
39  
40  
41  
42  
43  
44  
45  
46  
47  
48  
49  
50  
51  
52  
53  
54  
55  
56  
57  
58  
59  
60  
61  
62  
63  
64  
65

331 expression analysis gene counts were normalized between samples using the DESeq2 [33]  
332 algorithm. Significantly differentially expressed genes were analyzed in SARTools [34] using  
333 parametric relationship and p-value 0.05 as significance threshold. The Benjamini and Hochberg  
334 correction procedure [35] was used to adjust p-value.

335 **4.1 Composition of Simulated Communities**

336 In this study we utilised a set of simulated communities from Martinez *et al.* [8] where they  
337 collected 4943 genes from five abundant microbial genomes: *Bacteroides vulgatus* ATCC 8482,  
338 *Ruminococcus torques* L2-14, *Faecalibacterium prausnitzii* SL3/3, *Bacteroides thetaiotaomicron*  
339 VPI-5482 and *Parabacteroides distasonis* ATCC 8503. We simulated short reads into 100 samples  
340 using Polyester [36] embedded in a script provided by Martinez *et al.* [8] at coverage of 20x  
341 which resulted in a count table and short reads with 2395 genes to add the impact of sequencing  
342 coverage. Their abundance was then regulated up and down and by knocking out few genes in a  
343 controlled manner in order to make the composition similar to real world metatranscriptomes.  
344 The process of regulation of abundance was done by first dividing the 100 samples into 2 groups  
345 (“A” and “B”) and then increasing the abundance of 10% genes up to 4-fold, decreasing the  
346 abundance of another 10% of the genes 4-fold and completely removing another 5% of the genes  
347 from both simulated reads and count tables. The process of selection of samples and genes was  
348 random but tracked. To include quality bias, we used the ART simulator [37] to produce an equal  
349 number of reads in FASTQ format to those produced by Polyester. ART was initially trained with  
350 Hi-Seq 2500 Illumina quality error model from dataset discussed above to have a consistent error  
351 bias. After simulating FASTQ files we then extracted the quality data and bound it to the FASTA

1  
2  
3  
4  
5  
6  
7  
8  
9  
10  
11  
12  
13  
14  
15  
16  
17  
18  
19  
20  
21  
22  
23  
24  
25  
26  
27  
28  
29  
30  
31  
32  
33  
34  
35  
36  
37  
38  
39  
40  
41  
42  
43  
44  
45  
46  
47  
48  
49  
50  
51  
52  
53  
54  
55  
56  
57  
58  
59  
60  
61  
62  
63  
64  
65

352 files generating new FASTQ files. With the coverage bias and quality training included we had a  
353 total of 62,035,912 reads (310,179 ± 3,454 reads/sample).

354 **4.2 Evaluation Measures**

355 We used the standard measures of precision (also named positive predictive value, PPV),  
356 accounting for how many annotations and identifications of significantly differentially expressed  
357 gene families and subsystems are correct and defined as  $\frac{TP}{TP+FP}$  and recall (also named sensitivity  
358 or true positive rate, TPR), accounting for how many correct annotations are selected, defined as  
359  $\frac{TP}{TP+FN}$  where TP indicates the number of orthologs that have been correctly annotated, FN  
360 indicates the number of orthologs/genes/functional subsystem which are in the simulated  
361 communities but were not found by a certain approach and FP indicates the number of  
362 orthologs/genes/functional subsystem that have been wrongly annotated (because they do not  
363 appear in the simulated communities). The F-score is the harmonic mean of precision and recall,  
364 defined as  $2 * \frac{Precision * Recall}{Precision + Recall}$

1  
2  
3  
4  
5  
6  
7  
8  
9  
10  
11  
12  
13  
14  
15  
16  
17  
18  
19  
20  
21  
22  
23  
24  
25  
26  
27  
28  
29  
30  
31  
32  
33  
34  
35  
36  
37  
38  
39  
40  
41  
42  
43  
44  
45  
46  
47  
48  
49  
50  
51  
52  
53  
54  
55  
56  
57  
58  
59  
60  
61  
62  
63  
64  
65

365 **Availability of source code and requirements**

- 366 • Project name: Comparative Metatranscriptomics Workflow [CoMW]
- 367 • Project home page: <https://github.com/anwarMZ/CoMW>
- 368 • Operating system(s): Platform independent
- 369 • Programming language: Python, R, and bash
- 370 • Other requirements: Requirements mentioned in detailed manual at GitHub
- 371 • License: GNU General Public License v3.0

372 **Availability of supporting data and materials**

373 Raw sequence data generated using simulation of full-length genes were deposited in the NCBI  
374 Sequence Read Archive and are accessible through BioProject accession number PRJNA509064  
375 All databases can be accessed in one place at [http://tiny.cc/CoMW\\_DBs](http://tiny.cc/CoMW_DBs)

376 Supplementary File 1 – Precision Recall Analysis of both approaches  
377 Supplementary File 2 – Differential Expression Analysis of all approaches using eggNOG  
378 database

379 Supplementary File 3 – Differential Expression Analysis of all approaches using CAZy database

380 Supplementary File 4 – Differential Expression Analysis of all approaches using NCyc database

381 **Declarations**

382 --

383 **List of abbreviations**

384 FDR: False Discovery Rate, FP: False Positives, TP: True Positives, FN: False Negatives, mRNA:  
385 messenger RNA

386 **Ethical Approval (optional)**

1  
2  
3  
4  
5  
6  
7  
8  
9  
10  
11  
12  
13  
14  
15  
16  
17  
18  
19  
20  
21  
22  
23  
24  
25  
26  
27  
28  
29  
30  
31  
32  
33  
34  
35  
36  
37  
38  
39  
40  
41  
42  
43  
44  
45  
46  
47  
48  
49  
50  
51  
52  
53  
54  
55  
56  
57  
58  
59  
60  
61  
62  
63  
64  
65

387 Not applicable

388 ***Consent for publication***

389 Not applicable

390 ***Competing Interests***

391 The authors declare that they have no competing interests.

392 ***Funding***

393 This work was supported by a grant from the European Commission’s Marie Skłodowska Curie

394 Actions program under project number 675546 (*MicroArctic*).

395 ***Author's Contributions***

396 MZA & CSJ conceived and designed the study. MZA, TBA and AL carried out the data

397 production. MZA and AL carried out analysis. MZA drafted the manuscript and AL, TBA and CSJ

398 revised and approved the final version.

399 ***Acknowledgements***

400 Authors would like to acknowledge MicroArctic project for the funding and would like to thank

401 authors of Metatrans for providing the data used for simulation.

402 ***Authors' information (optional)***

403

## 404 References

- 405 1. Coolen MJL, Orsi WD. The transcriptional response of microbial communities in thawing Alaskan  
406 permafrost soils. *Front Microbiol* [Internet]. 2015 [cited 2018 Oct 25];6. Available from:  
407 <https://www.frontiersin.org/articles/10.3389/fmicb.2015.00197/full>
- 408 2. Gonzalez E, Pitre FE, Pagé AP, Marleau J, Guidi Nissim W, St-Arnaud M, et al. Trees, fungi and bacteria:  
409 tripartite metatranscriptomics of a root microbiome responding to soil contamination. *Microbiome*.  
410 2018;6:53.
- 411 3. Leimena MM, Ramiro-Garcia J, Davids M, van den Bogert B, Smidt H, Smid EJ, et al. A comprehensive  
412 metatranscriptome analysis pipeline and its validation using human small intestine microbiota datasets.  
413 *BMC Genomics*. 2013;14:530.
- 414 4. Jung JY, Lee SH, Jin HM, Hahn Y, Madsen EL, Jeon CO. Metatranscriptomic analysis of lactic acid  
415 bacterial gene expression during kimchi fermentation. *Int J Food Microbiol*. 2013;163:171–9.
- 416 5. Langmead B, Trapnell C, Pop M, Salzberg SL. Ultrafast and memory-efficient alignment of short DNA  
417 sequences to the human genome. *Genome Biol*. 2009;10:R25.
- 418 6. Poulsen M, Schwab C, Jensen BB, Engberg RM, Spang A, Canibe N, et al. Methylo-trophic  
419 methanogenic Thermoplasmata implicated in reduced methane emissions from bovine rumen. *Nat*  
420 *Commun*. 2013;4:1428.
- 421 7. Rodrigue S, Materna AC, Timberlake SC, Blackburn MC, Malmstrom RR, Alm EJ, et al. Unlocking Short  
422 Read Sequencing for Metagenomics. *PLOS ONE*. 2010;5:e11840.
- 423 8. Martinez X, Pozuelo M, Pascal V, Campos D, Gut I, Gut M, et al. MetaTrans: an open-source pipeline  
424 for metatranscriptomics. *Sci Rep*. 2016;6:26447.
- 425 9. Wilke A, Harrison T, Wilkening J, Field D, Glass EM, Kyrpides N, et al. The M5nr: a novel non-  
426 redundant database containing protein sequences and annotations from multiple sources and  
427 associated tools. *BMC Bioinformatics*. 2012;13:141.
- 428 10. Huerta-Cepas J, Szklarczyk D, Forslund K, Cook H, Heller D, Walter MC, et al. eggNOG 4.5: a  
429 hierarchical orthology framework with improved functional annotations for eukaryotic, prokaryotic and  
430 viral sequences. *Nucleic Acids Res*. 2016;44:D286–93.
- 431 11. Aguiar-Pulido V, Huang W, Suarez-Ulloa V, Cickovski T, Mathee K, Narasimhan G. Metagenomics,  
432 Metatranscriptomics, and Metabolomics Approaches for Microbiome Analysis. *Evol Bioinforma Online*.  
433 2016;12:5–16.
- 434 12. Almeida A, Mitchell AL, Tarkowska A, Finn RD. Benchmarking taxonomic assignments based on 16S  
435 rRNA gene profiling of the microbiota from commonly sampled environments. *GigaScience*. 2018;7.
- 436 13. Cantarel BL, Coutinho PM, Rancurel C, Bernard T, Lombard V, Henrissat B. The Carbohydrate-Active  
437 EnZymes database (CAZy): an expert resource for Glycogenomics. *Nucleic Acids Res*. 2009;37:D233-238.



- 1  
2  
3  
4 438 14. Tu Q, Lin L, Cheng L, Deng Y, He Z. NCycDB: a curated integrative database for fast and accurate  
5 439 metagenomic profiling of nitrogen cycling genes. *Bioinforma Oxf Engl.* 2018;  
6  
7  
8 440 15. Buchfink B, Xie C, Huson DH. Fast and sensitive protein alignment using DIAMOND. *Nat Methods.*  
9 441 2015;12:59–60.
- 10  
11 442 16. Vaser R, Pavlović D, Šikić M. SWORD—a highly efficient protein database search. *Bioinformatics.*  
12 443 2016;32:i680–4.
- 13  
14 444 17. Schostag MD, Anwar MZ, Jacobsen CS, Larose C, Vogel TM, Maccario L, et al. Transcriptomic  
15 445 responses to warming and cooling of microbial communities in an Arctic tundra soil. *Moleuclar Ecol.*  
16 446 Under Review;
- 17  
18  
19 447 18. Bang-Andreasen T, Anwar MZ, Lanzen A, Kjoller R, Ronn R, Ekelund F, et al. Total RNA-sequencing  
20 448 reveals complex taxonomic and functional responses to wood ash application in agricultural and forest  
21 449 soil multi-level microbial communities. *ISME.* Under Review;
- 22  
23  
24 450 19. Grabherr MG, Haas BJ, Yassour M, Levin JZ, Thompson DA, Amit I, et al. Trinity: reconstructing a full-  
25 451 length transcriptome without a genome from RNA-Seq data. *Nat Biotechnol.* 2011;29:644–52.
- 26  
27 452 20. Celaj A, Markle J, Danska J, Parkinson J. Comparison of assembly algorithms for improving rate of  
28 453 metatranscriptomic functional annotation. *Microbiome.* 2014;2:39.
- 29  
30  
31 454 21. Lau MCY, Harris RL, Oh Y, Yi MJ, Behmard A, Onstott TC. Taxonomic and Functional Compositions  
32 455 Impacted by the Quality of Metatranscriptomic Assemblies. *Front Microbiol [Internet].* 2018 [cited 2018  
33 456 Oct 25];9. Available from: <https://www.ncbi.nlm.nih.gov/pmc/articles/PMC6019464/>
- 34  
35 457 22. Griffiths-Jones S, Bateman A, Marshall M, Khanna A, Eddy SR. Rfam: an RNA family database. *Nucleic*  
36 458 *Acids Res.* 2003;31:439–41.
- 37  
38  
39 459 23. Nawrocki EP, Eddy SR. Infernal 1.1: 100-fold faster RNA homology searches. *Bioinformatics.*  
40 460 2013;29:2933–5.
- 41  
42 461 24. Rice P, Longden I, Bleasby A. EMBOSS: The European Molecular Biology Open Software Suite. *Trends*  
43 462 *Genet.* 2000;16:276–7.
- 44  
45 463 25. Ni Y, Li J, Panagiotou G. COMAN: a web server for comprehensive metatranscriptomics analysis. *BMC*  
46 464 *Genomics.* 2016;17:622.
- 47  
48  
49 465 26. Westreich ST, Treiber ML, Mills DA, Korf I, Lemay DG. SAMSA2: a standalone metatranscriptome  
50 466 analysis pipeline. *BMC Bioinformatics.* 2018;19:175.
- 51  
52  
53 467 27. Namiki T, Hachiya T, Tanaka H, Sakakibara Y. MetaVelvet: an extension of Velvet assembler to de  
54 468 novo metagenome assembly from short sequence reads. *Nucleic Acids Res.* 2012;40:e155.
- 55  
56 469 28. Schulz MH, Zerbino DR, Vingron M, Birney E. Oases: robust de novo RNA-seq assembly across the  
57 470 dynamic range of expression levels. *Bioinformatics.* 2012;28:1086–92.
- 58  
59  
60  
61  
62  
63  
64  
65

1  
2  
3  
4  
5  
6  
7  
8  
9  
10  
11  
12  
13  
14  
15  
16  
17  
18  
19  
20  
21  
22  
23  
24  
25  
26  
27  
28  
29  
30  
31  
32  
33  
34  
35  
36  
37  
38  
39  
40  
41  
42  
43  
44  
45  
46  
47  
48  
49  
50  
51  
52  
53  
54  
55  
56  
57  
58  
59  
60  
61  
62  
63  
64  
65

471 29. Simpson JT, Wong K, Jackman SD, Schein JE, Jones SJM, Birol Í. ABySS: A parallel assembler for short  
472 read sequence data. *Genome Res.* 2009;19:1117–23.

473 30. Luo R, Liu B, Xie Y, Li Z, Huang W, Yuan J, et al. SOAPdenovo2: an empirically improved memory-  
474 efficient short-read de novo assembler. *GigaScience.* 2012;1:18.

475 31. Rho M, Tang H, Ye Y. FragGeneScan: predicting genes in short and error-prone reads. *Nucleic Acids*  
476 *Res.* 2010;38:e191.

477 32. Li W, Godzik A. Cd-hit: a fast program for clustering and comparing large sets of protein or  
478 nucleotide sequences. *Bioinforma Oxf Engl.* 2006;22:1658–9.

479 33. Love MI, Huber W, Anders S. Moderated estimation of fold change and dispersion for RNA-seq data  
480 with DESeq2. *Genome Biol [Internet].* 2014 [cited 2018 Oct 25];15. Available from:  
481 <https://www.ncbi.nlm.nih.gov/pmc/articles/PMC4302049/>

482 34. Varet H, Brillet-Guéguen L, Coppée J-Y, Dillies M-A. SARTools: A DESeq2- and EdgeR-Based R Pipeline  
483 for Comprehensive Differential Analysis of RNA-Seq Data. *PLOS ONE.* 2016;11:e0157022.

484 35. Benjamini Y, Hochberg Y. Controlling the False Discovery Rate: A Practical and Powerful Approach to  
485 Multiple Testing. *J R Stat Soc Ser B Methodol.* 1995;57:289–300.

486 36. Frazee AC, Jaffe AE, Langmead B, Leek JT. Polyester: simulating RNA-seq datasets with differential  
487 transcript expression. *Bioinformatics.* 2015;31:2778–84.

488 37. Huang W, Li L, Myers JR, Marth GT. ART: a next-generation sequencing read simulator.  
489 *Bioinformatics.* 2012;28:593–4.

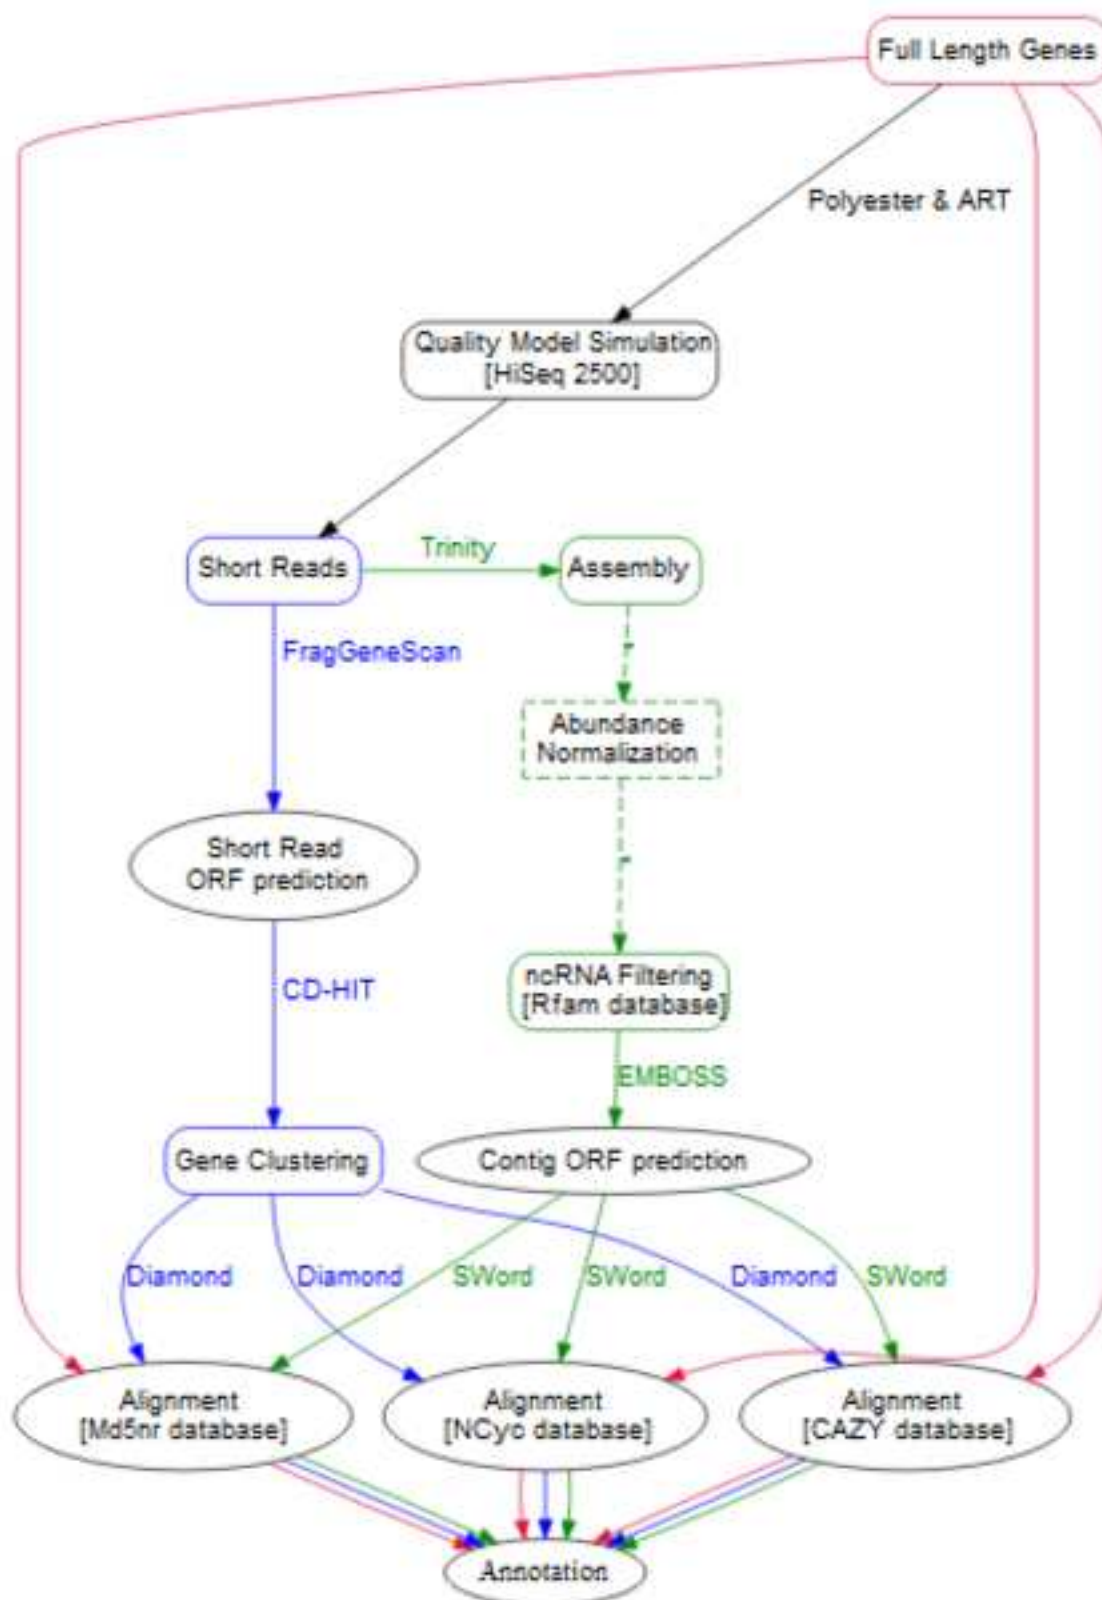

\* Custom python scripts, added in CoMW

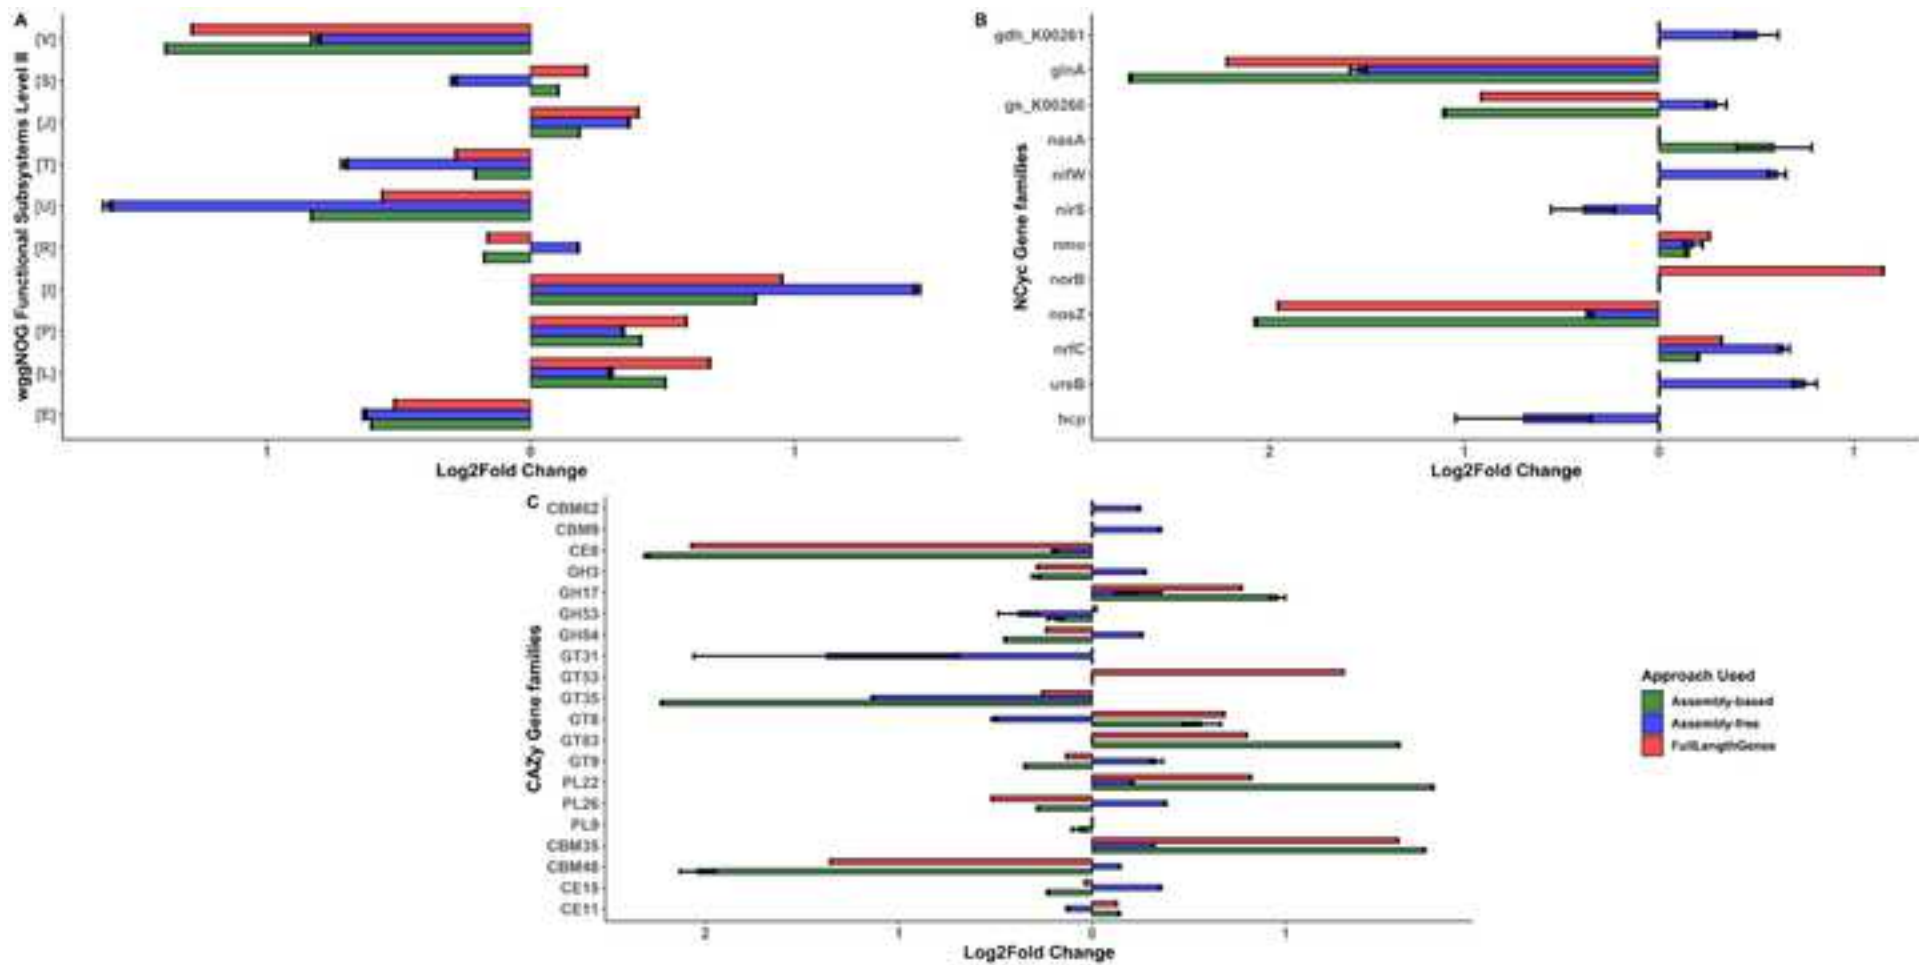

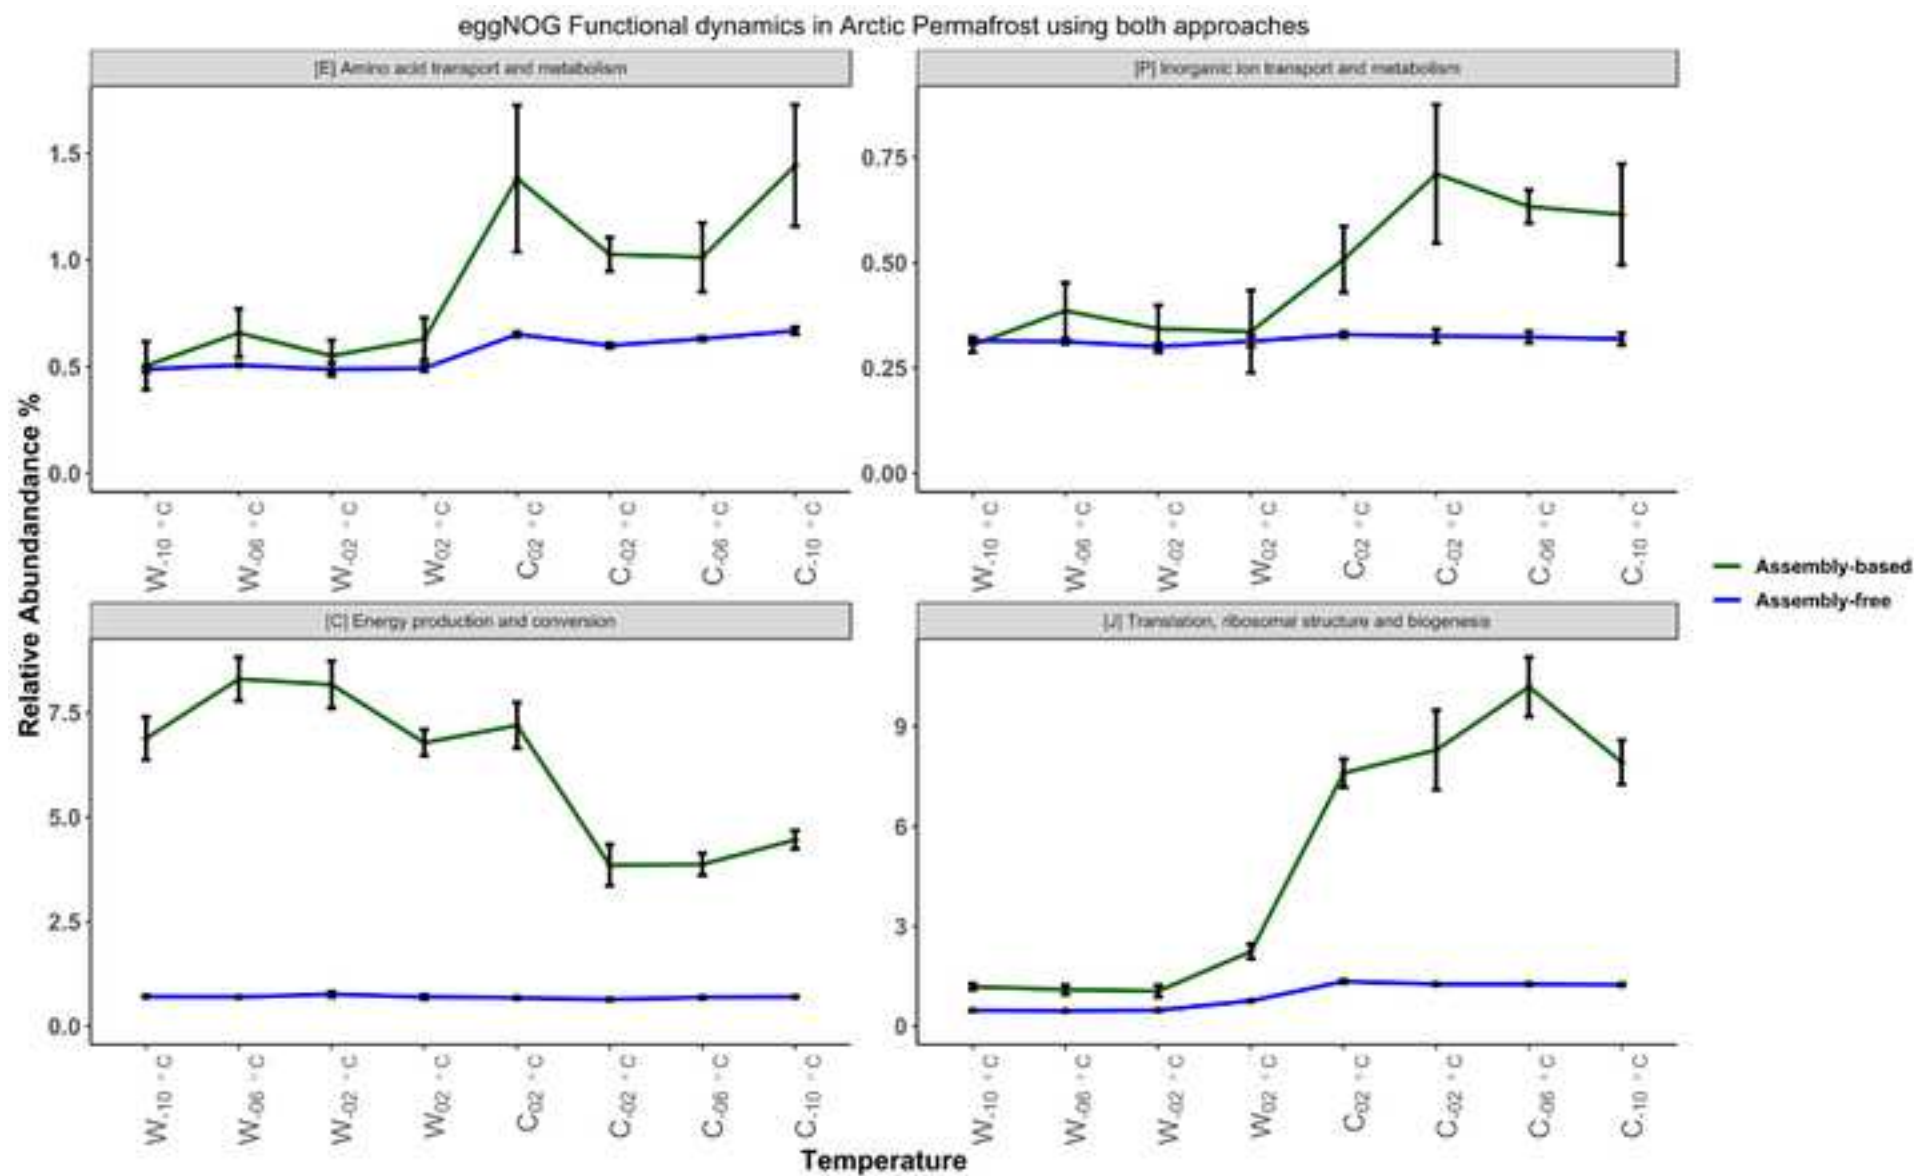

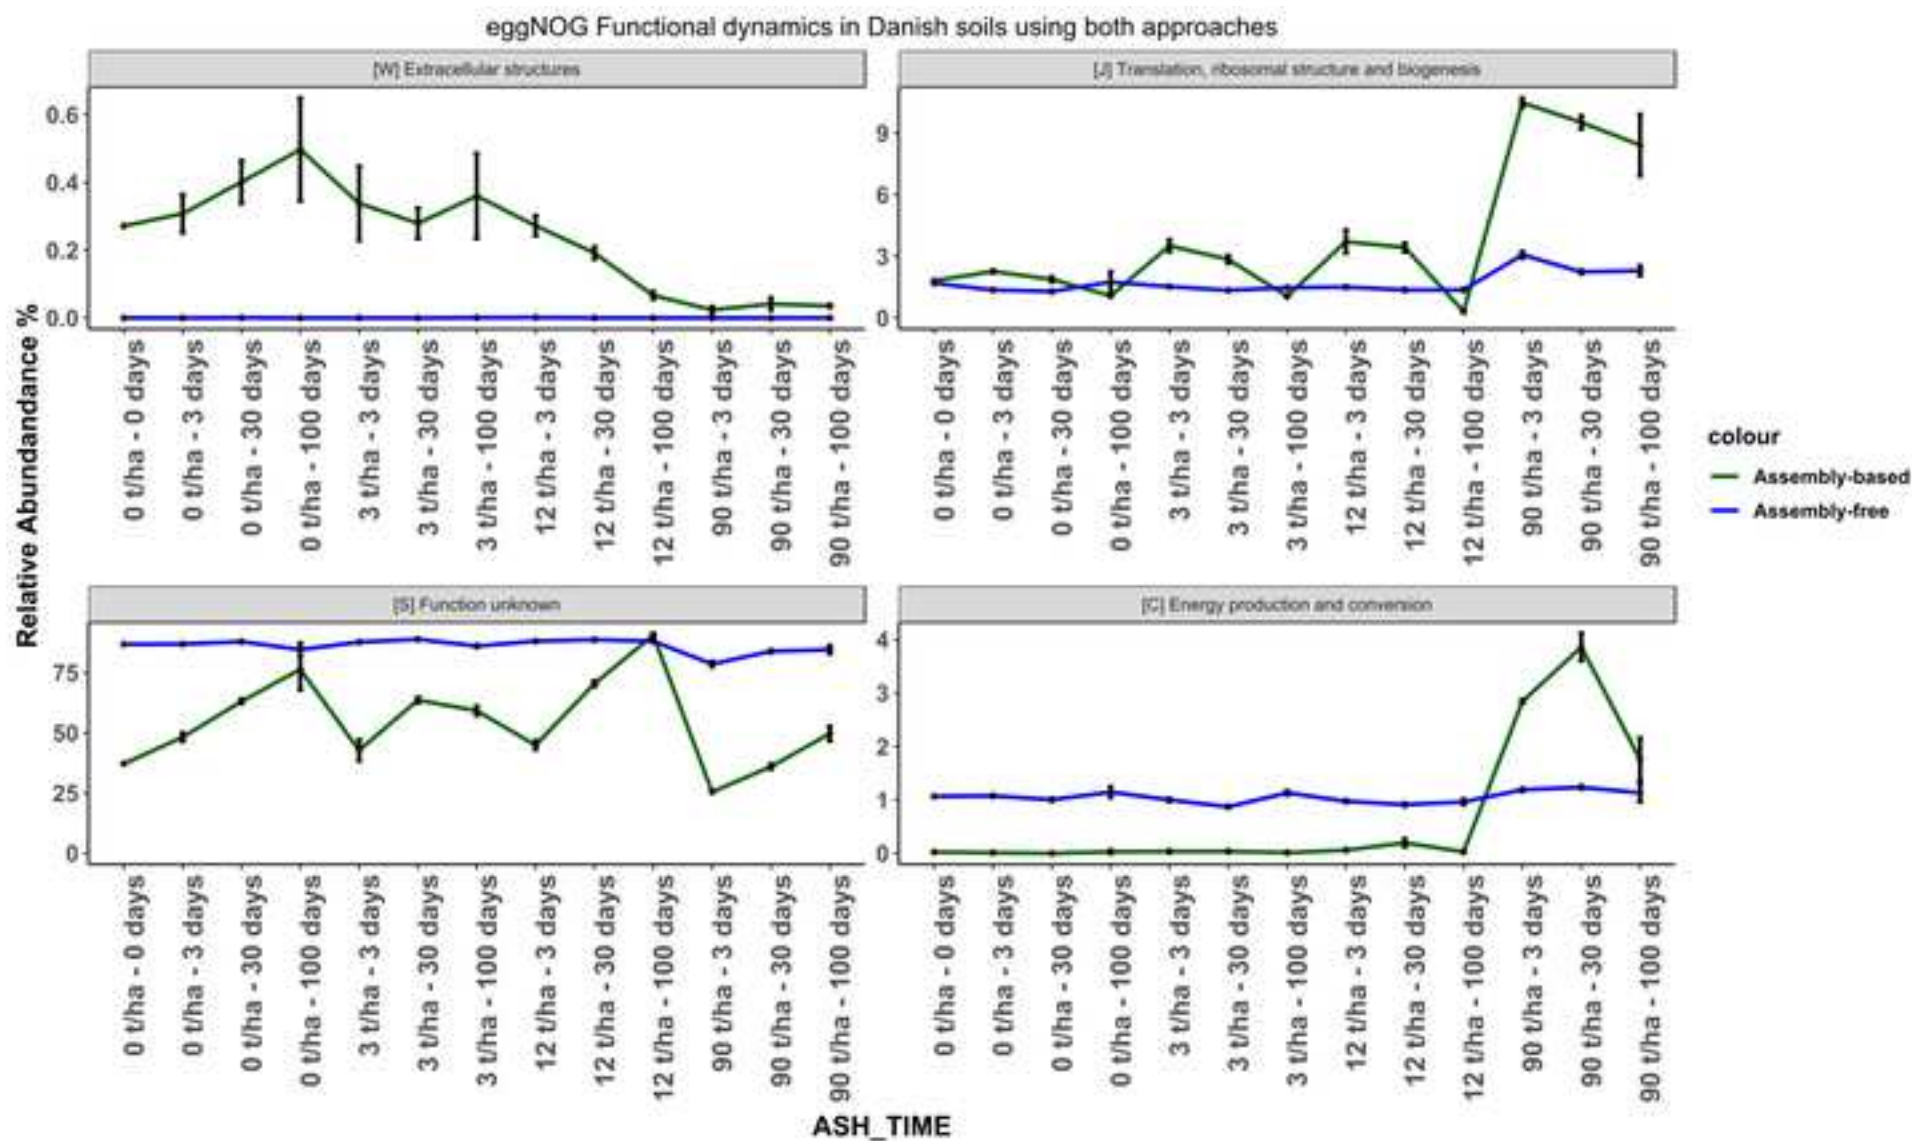

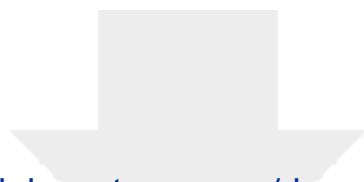

[Click here to access/download](#)

**Supplementary Material**

SupplementaryFile1\_PrecisionRecall.docx

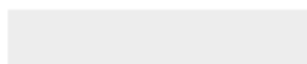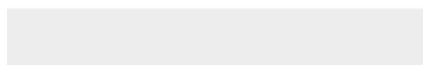

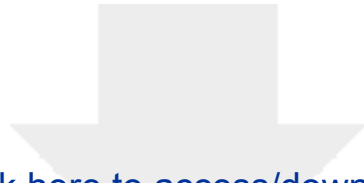

[Click here to access/download](#)

**Supplementary Material**

[SupplementaryFile2\\_eggNOG\\_DEAnalysis.xlsx](#)

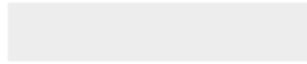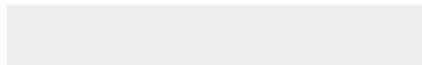





[Click here to access/download](#)

**Supplementary Material**

[SupplementaryFile3\\_CAzy\\_DEAnalysis.xlsx](#)

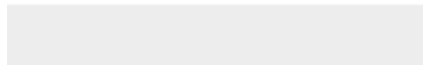



[Click here to access/download](#)

**Supplementary Material**

[SupplementaryFile4\\_NCyC\\_DEAnalysis.xlsx](#)

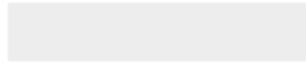

To: Editor, *GigaScience*

Re: Submission of manuscript entitled "To assemble or not to resemble – benchmarking of metatranscriptomic practices and a validated Comparative Metatranscriptomics Workflow (CoMW)" to *GigaScience*

Metatranscriptomics has recently gained popularity, thanks to its ability to uncover the active functional profiles of microbial communities. Being a relatively recent approach, there are still several analytical obstacles that limit its large-scale application. Sequence reference databases are also limited in their coverage and thus the use of different workflows and databases can lead to different outcomes, rendering it difficult to compare results between independent studies.

We have conducted a comprehensive comparison of workflows representing the two main alternatives for metatranscriptome analysis, namely assembly-based or assembly-free. This comparison was done using both simulated datasets and real world metatranscriptomes using three different hierarchical databases. To the best of our knowledge this is first independent comparison of these alternatives that will assist decision making and analysis of metatranscriptomics. Subsequently we also present a validated workflow using assembly-based analysis, which provided the best results according to simulated datasets.

We believe that GigaScience would be an outstanding forum for this manuscript, due to its intention of featuring interdisciplinary research; it would be of interest both to microbial ecologists, clinical microbiologists and bioinformaticians. To maintain open data and transparency in our benchmarking we have made all code, test data, results and supporting documents for CoMW available at different links provided within manuscript as per GigaScience policies. This manuscript presents material that has not previously been published and is not under consideration for publication elsewhere and all authors have seen and approved the final version submitted.

Thank you again for considering our manuscript.

Kind regards

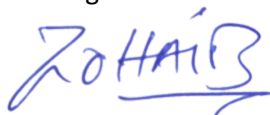

Muhammad Zohaib Anwar  
On behalf of Authors

**Environmental  
microbiology &  
biotechnology**

**Muhammad Zohaib Anwar**  
PhD Student

Date: 10 January 2019

E-mail:  
mzanwar@envs.au.dk  
Web:  
au.dk/en/mzanwar@envs

Sender's CVR no.:  
31119103

Page 1/1

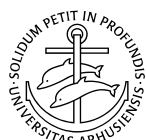

**Environmental microbiology &  
biotechnology**  
Aarhus University  
Frederiksborgvej 399  
PO box 358  
DK-4000 Roskilde  
Denmark

Tel.: +45 8715 0000  
Fax: +45 8715 5010  
E-mail: envs@au.dk  
Web: envs.au.dk/en
