# Supplementary material for: To assemble or not to resemble—A validated Comparative Metatranscriptomics Workflow (CoMW)
Source: PubMed Central journal article supplement (PMC6667343; doi:10.1093/gigascience/giz096), 2019-07-30
Supplement: giz096_giga-d-19-00009_revision_1.pdf [file giz096_giga-d-19-00009_revision_1.pdf]

# GigaScience

## To assemble or not to resemble – A validated Comparative Metatranscriptomics Workflow (CoMW) --Manuscript Draft--

|                                                      |                                                                                                                                                                                                                                                                                                                                                                                                                                                                                                                                                                                                                                                                                                                                                                                                                                                                                                                                                                                                                                                                                                                                                                                                                                                                                                                                                                                                                                                                                                                                                                                                                                                                                                                                                                                                                                                                                                                                                                                                                                                                                                                                                        |                             |
|------------------------------------------------------|--------------------------------------------------------------------------------------------------------------------------------------------------------------------------------------------------------------------------------------------------------------------------------------------------------------------------------------------------------------------------------------------------------------------------------------------------------------------------------------------------------------------------------------------------------------------------------------------------------------------------------------------------------------------------------------------------------------------------------------------------------------------------------------------------------------------------------------------------------------------------------------------------------------------------------------------------------------------------------------------------------------------------------------------------------------------------------------------------------------------------------------------------------------------------------------------------------------------------------------------------------------------------------------------------------------------------------------------------------------------------------------------------------------------------------------------------------------------------------------------------------------------------------------------------------------------------------------------------------------------------------------------------------------------------------------------------------------------------------------------------------------------------------------------------------------------------------------------------------------------------------------------------------------------------------------------------------------------------------------------------------------------------------------------------------------------------------------------------------------------------------------------------------|-----------------------------|
| <b>Manuscript Number:</b>                            | GIGA-D-19-00009R1                                                                                                                                                                                                                                                                                                                                                                                                                                                                                                                                                                                                                                                                                                                                                                                                                                                                                                                                                                                                                                                                                                                                                                                                                                                                                                                                                                                                                                                                                                                                                                                                                                                                                                                                                                                                                                                                                                                                                                                                                                                                                                                                      |                             |
| <b>Full Title:</b>                                   | To assemble or not to resemble – A validated Comparative Metatranscriptomics Workflow (CoMW)                                                                                                                                                                                                                                                                                                                                                                                                                                                                                                                                                                                                                                                                                                                                                                                                                                                                                                                                                                                                                                                                                                                                                                                                                                                                                                                                                                                                                                                                                                                                                                                                                                                                                                                                                                                                                                                                                                                                                                                                                                                           |                             |
| <b>Article Type:</b>                                 | Technical Note                                                                                                                                                                                                                                                                                                                                                                                                                                                                                                                                                                                                                                                                                                                                                                                                                                                                                                                                                                                                                                                                                                                                                                                                                                                                                                                                                                                                                                                                                                                                                                                                                                                                                                                                                                                                                                                                                                                                                                                                                                                                                                                                         |                             |
| <b>Funding Information:</b>                          | H2020 Marie Skłodowska-Curie Actions (675546)                                                                                                                                                                                                                                                                                                                                                                                                                                                                                                                                                                                                                                                                                                                                                                                                                                                                                                                                                                                                                                                                                                                                                                                                                                                                                                                                                                                                                                                                                                                                                                                                                                                                                                                                                                                                                                                                                                                                                                                                                                                                                                          | Prof. Carsten Suhr Jacobsen |
| <b>Abstract:</b>                                     | <p>Background</p> <p>Metatranscriptomics has been used widely for investigation and quantification of microbial communities' activity in response to external stimuli. By assessing the genes expressed, metatranscriptomics provide an understanding of the interactions between different major functional guilds and the environment. Here, we present de-novo assembly-based Comparative Metatranscriptomics Workflow (CoMW) implemented in a modular, reproducible structure, significantly improving the annotation and quantification of metatranscriptomes. Metatranscriptomics typically utilize short sequence reads, which can either be directly aligned to external reference databases ("assembly-free approach") or first assembled into contigs before alignment ("assembly-based approach"). We also compare CoMW (assembly-based implementation) with assembly-free alternative workflow, using simulated and real-world metatranscriptomes from Arctic and Temperate terrestrial environments. We evaluate their accuracy in precision and recall using generic and specialized hierarchical protein databases.</p> <p>Results</p> <p>CoMW provided significantly fewer false positives resulting in more precise identification and quantification of functional genes in metatranscriptomes. Using the comprehensive database M5nr, the assembly-based approach identified genes with only 0.6% false positives at thresholds ranging from inclusive to stringent compared to the assembly-free approach yielding up to 15% false positives. Using specialized databases (Carbohydrate Active-enzyme and Nitrogen Cycle), the assembly-based approach identified and quantified genes with 3-5x less false positives. We also evaluated the impact of both approaches on real-world datasets.</p> <p>Conclusions</p> <p>We present an open source de-novo assembly-based Comparative Metatranscriptomics Workflow (CoMW). Our benchmarking findings support the argument of assembling short reads into contigs before alignment to a reference database, since this provides higher precision and minimizes false positives.</p> |                             |
| <b>Corresponding Author:</b>                         | Muhammad Zohaib Anwar<br>Aarhus University<br>Roskilde, Copenhagen DENMARK                                                                                                                                                                                                                                                                                                                                                                                                                                                                                                                                                                                                                                                                                                                                                                                                                                                                                                                                                                                                                                                                                                                                                                                                                                                                                                                                                                                                                                                                                                                                                                                                                                                                                                                                                                                                                                                                                                                                                                                                                                                                             |                             |
| <b>Corresponding Author Secondary Information:</b>   |                                                                                                                                                                                                                                                                                                                                                                                                                                                                                                                                                                                                                                                                                                                                                                                                                                                                                                                                                                                                                                                                                                                                                                                                                                                                                                                                                                                                                                                                                                                                                                                                                                                                                                                                                                                                                                                                                                                                                                                                                                                                                                                                                        |                             |
| <b>Corresponding Author's Institution:</b>           | Aarhus University                                                                                                                                                                                                                                                                                                                                                                                                                                                                                                                                                                                                                                                                                                                                                                                                                                                                                                                                                                                                                                                                                                                                                                                                                                                                                                                                                                                                                                                                                                                                                                                                                                                                                                                                                                                                                                                                                                                                                                                                                                                                                                                                      |                             |
| <b>Corresponding Author's Secondary Institution:</b> |                                                                                                                                                                                                                                                                                                                                                                                                                                                                                                                                                                                                                                                                                                                                                                                                                                                                                                                                                                                                                                                                                                                                                                                                                                                                                                                                                                                                                                                                                                                                                                                                                                                                                                                                                                                                                                                                                                                                                                                                                                                                                                                                                        |                             |
| <b>First Author:</b>                                 | Muhammad Zohaib Anwar                                                                                                                                                                                                                                                                                                                                                                                                                                                                                                                                                                                                                                                                                                                                                                                                                                                                                                                                                                                                                                                                                                                                                                                                                                                                                                                                                                                                                                                                                                                                                                                                                                                                                                                                                                                                                                                                                                                                                                                                                                                                                                                                  |                             |
| <b>First Author Secondary Information:</b>           |                                                                                                                                                                                                                                                                                                                                                                                                                                                                                                                                                                                                                                                                                                                                                                                                                                                                                                                                                                                                                                                                                                                                                                                                                                                                                                                                                                                                                                                                                                                                                                                                                                                                                                                                                                                                                                                                                                                                                                                                                                                                                                                                                        |                             |
| <b>Order of Authors:</b>                             | Muhammad Zohaib Anwar<br>Anders Lanzen                                                                                                                                                                                                                                                                                                                                                                                                                                                                                                                                                                                                                                                                                                                                                                                                                                                                                                                                                                                                                                                                                                                                                                                                                                                                                                                                                                                                                                                                                                                                                                                                                                                                                                                                                                                                                                                                                                                                                                                                                                                                                                                 |                             |

|                                                |                                                                                                                                                                                                                                                                                                                                                                                                                                                                                                                                                                                                                                                                                                                                                                                                                                                                                                                                                                                                                                                                                                                                                                                                                                                                                                                                                                                                                                                                                                                                                                                                                                                                                                                                                                                                                                                                                                                                                                                                                                                                                                                                                                                                                                                                                                                                                                                                                                                                                                                                                                                                                                                                                                                                                                                                                                                                                                                                                                                                                                                                                                                                                                                                                                                                                                                                                                                                                                                                                                                                                                                                                                                                                                                                                                                                                                                                                                       |
|------------------------------------------------|-------------------------------------------------------------------------------------------------------------------------------------------------------------------------------------------------------------------------------------------------------------------------------------------------------------------------------------------------------------------------------------------------------------------------------------------------------------------------------------------------------------------------------------------------------------------------------------------------------------------------------------------------------------------------------------------------------------------------------------------------------------------------------------------------------------------------------------------------------------------------------------------------------------------------------------------------------------------------------------------------------------------------------------------------------------------------------------------------------------------------------------------------------------------------------------------------------------------------------------------------------------------------------------------------------------------------------------------------------------------------------------------------------------------------------------------------------------------------------------------------------------------------------------------------------------------------------------------------------------------------------------------------------------------------------------------------------------------------------------------------------------------------------------------------------------------------------------------------------------------------------------------------------------------------------------------------------------------------------------------------------------------------------------------------------------------------------------------------------------------------------------------------------------------------------------------------------------------------------------------------------------------------------------------------------------------------------------------------------------------------------------------------------------------------------------------------------------------------------------------------------------------------------------------------------------------------------------------------------------------------------------------------------------------------------------------------------------------------------------------------------------------------------------------------------------------------------------------------------------------------------------------------------------------------------------------------------------------------------------------------------------------------------------------------------------------------------------------------------------------------------------------------------------------------------------------------------------------------------------------------------------------------------------------------------------------------------------------------------------------------------------------------------------------------------------------------------------------------------------------------------------------------------------------------------------------------------------------------------------------------------------------------------------------------------------------------------------------------------------------------------------------------------------------------------------------------------------------------------------------------------------------------------|
|                                                | Toke Bang-Andreasen                                                                                                                                                                                                                                                                                                                                                                                                                                                                                                                                                                                                                                                                                                                                                                                                                                                                                                                                                                                                                                                                                                                                                                                                                                                                                                                                                                                                                                                                                                                                                                                                                                                                                                                                                                                                                                                                                                                                                                                                                                                                                                                                                                                                                                                                                                                                                                                                                                                                                                                                                                                                                                                                                                                                                                                                                                                                                                                                                                                                                                                                                                                                                                                                                                                                                                                                                                                                                                                                                                                                                                                                                                                                                                                                                                                                                                                                                   |
|                                                | Carsten Suhr Jacobsen                                                                                                                                                                                                                                                                                                                                                                                                                                                                                                                                                                                                                                                                                                                                                                                                                                                                                                                                                                                                                                                                                                                                                                                                                                                                                                                                                                                                                                                                                                                                                                                                                                                                                                                                                                                                                                                                                                                                                                                                                                                                                                                                                                                                                                                                                                                                                                                                                                                                                                                                                                                                                                                                                                                                                                                                                                                                                                                                                                                                                                                                                                                                                                                                                                                                                                                                                                                                                                                                                                                                                                                                                                                                                                                                                                                                                                                                                 |
| <b>Order of Authors Secondary Information:</b> |                                                                                                                                                                                                                                                                                                                                                                                                                                                                                                                                                                                                                                                                                                                                                                                                                                                                                                                                                                                                                                                                                                                                                                                                                                                                                                                                                                                                                                                                                                                                                                                                                                                                                                                                                                                                                                                                                                                                                                                                                                                                                                                                                                                                                                                                                                                                                                                                                                                                                                                                                                                                                                                                                                                                                                                                                                                                                                                                                                                                                                                                                                                                                                                                                                                                                                                                                                                                                                                                                                                                                                                                                                                                                                                                                                                                                                                                                                       |
| <b>Response to Reviewers:</b>                  | <p>We thank the journal for conducting a thorough review of our manuscript, and value the thoughtful comments provided by the reviewers. Our responses to specific reviewer comments are below. We have attempted to address all comments individually and incorporated changes as needed. We have attached a response file to the file inventory that might be of help.<br/>Comment = C, Response R</p> <p>Editor:</p> <p>C1: Although it is of interest, we are unable to consider it for publication in its current form. The reviewers have raised a number of points which we believe would improve the manuscript and may allow a revised version to be published in GigaScience. As a major concern the reviewers, in particular reviewer 2, highlight that many details, especially regarding the methods, are missing.</p> <p>R1: We thank the editor and reviewers for their valuable feedback and thoughtful comments. We also acknowledge the missing details that were missing in manuscript and thus have subsequently made all details explicitly available in the manuscript and below in specific responses to reviewers with external links where appropriate. We also believe that now we have addressed every comment by improving the manuscript and supplementary information, please see specific answers to each comment below.</p> <p>C2: They also recommend to package the tool with docker or conda, as they had some problems installing the software.</p> <p>R2: Installation has been made significantly easier and reproducible using a conda environment as suggested. Now the user has to just create a conda environment with provided configuration file that includes all framework tools, libraries, dependencies and third-party tools along with optimized versions. A small bash script is also added which will download the databases directly from the FTP server <a href="https://mzacomw.au.dk">https://mzacomw.au.dk</a> hosted by Aarhus University.<br/>&gt; conda env create -f CoMW.yml<br/>&gt; source activate CoMW<br/>&gt; bash install.sh<br/>A detailed answer is given to reviewers below. Also, an updated Readme and Manual are made available at the Github repository. See <a href="https://github.com/anwarMZ/CoMW">https://github.com/anwarMZ/CoMW</a></p> <p>C3: Please improve the description of methods and parameters.</p> <p>R3: We have now also made a configuration file available that is used for the installation. This file also contains the versions of the libraries, channels, third party tools and versions of framework tools (e.g. python, R). Please see <a href="https://github.com/anwarMZ/CoMW/blob/master/CoMW.yml">https://github.com/anwarMZ/CoMW/blob/master/CoMW.yml</a>. Parameters used are also now added in to the comments here or manuscript depending upon suitability.</p> <p>C4: Please also share all supporting scripts and code (this can be done via GitHub, or via our repository GigaDB).</p> <p>R4: All scripts are shared in the Github repository– <a href="https://github.com/anwarMZ/CoMW">https://github.com/anwarMZ/CoMW</a><br/>Script used for simulating short reads from mock communities used is also now referenced in the text. The script used was made available by the Metatrans authors: <a href="https://media.nature.com/original/nature-assets/srep/2016/160523/srep26447/extref/srep26447-s1.doc">https://media.nature.com/original/nature-assets/srep/2016/160523/srep26447/extref/srep26447-s1.doc</a> Additional scripts for removing a functional subsystem from the database and SARTools differential expression analysis and parameters for running metatrans (assembly-free) approach are now added to separate Github-repo as suggested by the 2nd reviewer - <a href="https://github.com/anwarMZ/CoMW_supp">https://github.com/anwarMZ/CoMW_supp</a></p> |

C5: Submit code and data to code ocean as a “computational capsule” (<https://codeocean.com/>). Code ocean assigns DOIs, which you can cite in your GigaScience manuscript.

R5: As suggested, CoMW is now published as a peer-reviewed computational capsule at codeocean [1] and can be accessed through <https://doi.org/10.24433/CO.1793842.v1>

C6: Please also clarify the origin of the “real world datasets” and the papers referred to as being “under review” – is there a preprint that can be cited in the paper, if these are not yet published.

R6: We have now made both manuscripts available at BioRxiv. Authors MZA and CSJ are co-authors on both studies, whereas AL is co-author on one study led by TBA. Both the manuscripts contain experimental setup, details about the datasets and implementation of CoMW for the analysis. 1. Schostag, Morten Dencker, Muhammad Zohaib Anwar, Carsten Suhr Jacobsen, Catherine Larose, Timothy M. Vogel, Lorrie Maccario, Samuel Jacquiod, Samuel Faucherre, and Anders Priemé. "Transcriptomic responses to warming and cooling of an Arctic tundra soil microbiome." bioRxiv (2019): 599233. 2. Bang-Andreasen, Toke, Muhammad Zohaib Anwar, Anders Lanzen, Rasmus Kjøller, Regin Rønn, Flemming Ekelund, and Carsten Suhr Jacobsen. "Total RNA-sequencing reveals multi-level microbial community changes and functional responses to wood ash application in agricultural and forest soil." bioRxiv (2019): 621557.

C7: Both reviewers also feel that the overall structure of the manuscript needs improvement. Reviewer 1 got the impression that it reads almost as if being two separate manuscripts, with two separate aims. I recommend that you should consider this remark to improve the clarity of the paper and its message, how it all ties together.

R7: We appreciate the comments of both reviewers that remarked about this. In line with both, but more specifically as suggested by Reviewer 2, we have restructured the paper significantly to make it easier to read and to make the Methods section clearer. We first describe the overall implementation of CoMW, described in detail in Results, then the alternative approach, followed by the benchmarking and comparison between the two, using several reference databases for functional annotation, for both a simulated and a real-world dataset. We believe that now the manuscript with improved structure and previously missing details sync well for readers of GigaScience.

C8: In addition, please register any new software application in the SciCrunch.org database to receive a RRID (Research Resource Identification Initiative ID) number, and include this in your manuscript. This will facilitate tracking, reproducibility and re-use of your tool.

R8: CoMW is now registered at SciCrunch.org with RRID – SCR\_017109. Also updated in the manuscript as per appropriate.

Reviewer 1:

C1: The authors use a previously published simulated dataset as well as two real-world metaT datasets from two environments. In recent years more and more microbiome studies are coming out using metaT instead of metagenomics (metaG) to describe active genes and species within microbial communities. Therefore, it is right time to benchmark different methods and analysis pipelines for metaT studies.

R1: We appreciate the acknowledgment of our work and constructive feedback. We have made improvements as suggested by the reviewer where necessary. Please see below for more detailed response to each comment.

C2: The main problem that I have with the paper is that it's actually two papers, one

paper on testing. Different strategies for metaT analysis and one paper on a new analysis workflow for metaT analysis. For the second part, the CoMW pipeline, a more detailed description would be good, especially since it contains steps that are not necessary for the benchmark part before, e.g. the noncoding analysis. In general, I would strongly recommend to focus only on one of both parts and restructure the paper accordingly or have two separate papers.

R2: We appreciate the feedback and we have changed the overall structure of the paper to first of all present CoMW, then benchmark it using different sensitivity settings, and compare it to an assembly-free approach.

C3: The benchmarking part has the weakness that it is not really a comparison of existing tools or pipelines but of two strategies. The authors defined for each strategy the workflow they considered as the best, but obviously each strategy could be implemented with different tools and steps, and e.g. for the assembly-based strategy different tools and preprocessing steps can have a major impact for the resulting assemblies and therefore for all downstream analysis, but this is not really discussed here. For each strategy specific tools and parameters have been used. It should be clearer be stated why they have chosen, e.g. there are newer metaT assemblers than trinity, e.g. rnaspades and megahit, for the proposed benchmark I would at least want to see two or more implementations for each strategy.

R3: We agree with this comment, and thus we have restructured the manuscript significantly, as described above. It should now be clearer that the idea and scope of this study is focused on elucidating the difference of using a typical assembly-free approach, to a typical assembly-based approach, specifically our implementation of CoMW, using the state-of-the-art tools for each strategy and evaluating them as holistically as possible. Additionally, several benchmarking studies have already been done for certain steps included in CoMW eg. Zhao et al. & Celaj et al. [2,3]. Thus, we have used Trinity as our assembler based on these benchmarking results. Similarly, for assembly-free approach we have used DIAMOND as short read mapper which has been thoroughly compared to its similar tools such as BLASTX and RAPSearch2 [4]. Megahit is metagenomic assembler and we believe should not be used for metatranscriptomics. However, one of the reasons to make CoMW modular was to make the users able to use an alternative tool (if preferred due to any reason) at certain step. For example, rnaspades can be used as an assembler and skip the step of assembling through CoMW.

C4: In the introduction examples from human gut studies are missing.

R4: We agree with the comment and have subsequently added two example studies from Gosalbes et al., and Abu-Ali et al. [5], [6] in the introduction of the manuscript (please refer to L55)

C5: A critical review of prior benchmarks in metaG and/or metaT should be given, e.g. CAMI should be mentioned (<https://www.ncbi.nlm.nih.gov/pubmed/28967888>) and the authors should discuss if the results for metaG and metaT can be compared and what are the specific problems of benchmarking metaT workflows.

R5: We now refer to CAMI [7] in the Discussion (L264 in manuscript). However, it is mainly benchmarking tools for certain steps in metagenomics analyses.

C6: Why those three databases have been chosen, why not others.

R6: The databases were selected in order to include a representative selection of three different degrees of specialization, on a range from a more inclusive database with wide coverage (universality) and low degree of expert curation, to a smaller, highly curated database, with more narrow coverage. The three databases were also chosen because they are among the most widely used representing these categories. This is now also added to the introduction in manuscript. Please see L86-92.

C7: No discussion of other workflows available like anvi'o or IMP that could do similar things

R7: Both IMP and CoMW are modular can also be used together based on the preferred choice of the user. We have now clarified this in the Discussion and cited IMP. Please see L67 & from L266 in manuscript. Anvio is based on “maxBin” [8] which is a binning method mainly used for recovering individual genomes from metagenomes which is out of the scope of this study. IMP has some overlaps with our study, and some significant differences, which is now mentioned in the manuscript as well.

C8: The two real world datasets are only referenced as 'under review', either they should be submitted as preprint or added as supplement to the reviewers. Also, it is not clear if the authors are part of those studies.

R8: We agree and have now made both the manuscripts available at BioRxiv and have cited them in the revised manuscript. Please refer comment 6 to editor for more details.

C9: For the simulated dataset it is not totally clear how it was generated. Did the authors use only full-length genes or did they also include the non-coding parts of fully transcribed operon sequences as you would find expect them in real metaT datasets. This will have a big impact on the assembly quality, mapping and expression analysis.

R9: We used the full-length genes provided by the Martinez et al. [9]. (only coding part and not full operons). This is now explained in the manuscript (L368 onwards)

C10: How are the subsystems that were removed during the benchmarking procedure were chosen?

R10: Subsystems removed from each category were chosen on random to keep it unbiased removal. This is now updated in the manuscript along with reference to now updated script for the method. (L153 in manuscript)

C11:How the optimal alignment and mapping, e.g. BTS parameters were chosen for alignment and mapping?

R11: Both alignment and mapping were done on a range of parameters as described in Methods and specified in detail in supplementary file 1 to evaluate the performance for different (user selectable) sensitivity thresholds and avoid pre-selecting a certain threshold value. Assembled contigs were mapped from e-value 1E-1 to 1E-15. Similarly diamond alignment using short reads was tested on 15 BTS scores from BTS 10 to 150.

C12: The software is not straightforward to install, especially for non-bioinformaticians a real reproducible version using docker or conda would be highly appreciated. Also implementing the workflow as set of scripts should be transformed into a more formal structure using a workflow description like snakemake

R12: The software has now made significantly easier by using it in conda env and can be installed relatively easy in a separate conda container using the configuration file <https://github.com/anwarMZ/CoMW/blob/master/CoMW.yml> as described in the updated manuscript and attached CoMW manual. Now the user has to just create a conda env with provided configuration file that includes all framework tools, libraries, dependencies and third-party tools along with optimized versions and Run installation file

```
> conda env create -f configuration.yml
> source activate CoMW
> bash install.sh
```

Moreover, the aim of the workflow is to be modular and possible to adapt to alternative tools and databases. Though we appreciate the ease of use of Snakemake, especially for a user without expertise in python, we do not feel that this would allow for sufficient modularity. Instead CoMW is targeted to users with basic bioinformatics expertise comfortable to work in the command line, or for more advanced users with python expertise to allow changes in configuration, databases and programs used.

C13: Title is way too long and should be changed according the possible restructuring of the manuscript

R13: Suggestion well taken and since we have restructured the manuscript according to feedback we have also restructured the title a bit.

C14:Line 193: wrong figure seems to be referenced. Figure 3 should be Figure 2.

R14: We have changed the manuscript accordingly

C15:In paragraph 2.1.3 the reference to Figure 3 (not 6) is missing. Figures 3 and 4: colours not explained and unclear.

R15: We have corrected the reference to the figure and have improved the figure and caption.

C16: Numbers zero to nine should be given as words.

R16: We have corrected this style error throughout the manuscript.

C17: 132: Assembly-based should be lower case

R17: Correction well taken and we have updated for consistency all throughout the manuscript accordingly.

C18:Table 2: not clear when lower and upper case is used and why

R18: We apologize the unclear annotation and have changed incorrect uppercase words

C19: 161: Nitrogen upper case

R19: We have updated for consistency all throughout the manuscript accordingly.

C20:SARTOOLS has a different reference

<https://www.ncbi.nlm.nih.gov/pmc/articles/PMC4900645/>

R20: Thank you for pointing out. During in-text citation, one of the citations is mis-cited. Corrected now throughout

C21:Ref 21, reference style is wrong

R21: Correction well taken and references are consistent now

C22:Not clear how to handle references that are currently under review, should be put on bioarxiv e.g. reference 17 and 18

R22: Please see comment no 8 and comment 6 to editor. We have now made both manuscripts available on BioRxiv

C23: Description of required software versions is missing, e.g. which Java and Python version

R23: The missing information of versions is now part of configuration file along with all libraries and dependencies. See configuration file at <https://github.com/anwarMZ/CoMW/blob/master/CoMW.yml>

Reviewer 2:

C1: My primary concern with the paper is that as it stands I am not sure that anyone would be able to replicate these analyses. Broadly, I think that the methods section is confusingly structured. I found myself skipping back and forth to try to figure out what you had done. The methods section should be restructured and organized to follow the flow of the analysis presented in the results. I suggest starting with a section describing how the mock data sets were created, then describe the use of the real-world meta-transcriptomes (which aren't well covered in the materials and methods), and then describe the two pipelines that were used including your novel CoMW.

R1: We appreciate the comments of the two reviewers that both remarked about this. In line with both, but more specifically as suggested by Reviewer 2, we have restructured the paper to make it easier to read and to make the Methods section clearer. We first describe the overall implementation of COMW, described in detail in Results, then the alternative approach, followed by the benchmarking and comparison between the two, using several reference databases for functional annotation, for both a simulated and a real-world dataset.

C2: Throughout the materials and methods, you should make sure that sufficient detail on all programs/tools used are included - meaning that the version of all software products should be included (e.g. DESeq2, Trinity, Diamond, etc.). Additionally, all parameters used should be included.

R2: We agree and have now made a configuration file available that is used for the installation. This file also contains the versions of the libraries, channels, third party tools and versions of framework tools (e.g. python, R). Please see this - <https://github.com/anwarMZ/CoMW/blob/master/CoMW.yml> Parameters used are also now added in manuscript depending upon suitability.

C3: Notably the description of the removal of "functional subsystems" was missing from the methods. How was this done?

R3: Subsystems to remove from each category were chosen on random to keep it unbiased removal.

<https://mzacomw.au.dk/eggNOG.md52id2ont.zip>

A file provided with eggNOG annotations was used to filter all sequences using script provided in supplementary repository, [https://github.com/anwarMZ/CoMW\\_supp/blob/master/remove\\_m5nr\\_subsystem.py](https://github.com/anwarMZ/CoMW_supp/blob/master/remove_m5nr_subsystem.py) from database file by tracking the md5sum of Orthologous groups belonging to a certain functional subsystem. The manuscript has been updated to describe this in detail.

C4: I also do not think sufficient information was provided regarding how the mock RNA libraries were generated.

R4: These libraries were generated by Martinez et al. [9] and are described in more detail in the cited paper. Briefly, a subsample of 1000 genes from five different microorganisms was selected randomly, injected into Polyester to simulate short reads for two groups with different transcription levels, each containing 50 simulated samples.

C5: Moreover, the authors should clarify how the differential expression analysis was done-it appears to be absent from the paper.

R5: We used the template script provided by the SARTools for DESeq2 analysis. [https://github.com/PF2-pasteur-fr/SARTools/blob/master/template\\_script\\_DESeq2.r](https://github.com/PF2-pasteur-fr/SARTools/blob/master/template_script_DESeq2.r) now updated in the manuscript as well. L354 in manuscript

C6: Broadly speaking, I think it would be useful to have another github repo or a folder on the current github that contains all the supplementary scripts that were used for this publication (e.g. the Polyester scripts used, DE expression, etc.)

R6: All scripts are shared in the Github repository- <https://github.com/anwarMZ/CoMW>

One additional script used for simulating short reads from mock communities used is already made available by the Metatrans authors:

<https://media.nature.com/original/nature-assets/srep/2016/160523/srep26447/extref/srep26447-s1.doc>

C7: The pipeline is great as written-- but I do wonder why it is written in python and not implemented in some sort of workflow language/system (e.g. pydoit, snakemake, etc.). If the goal is reproducibility, conda environments (or the like) should be included to facilitate the use of the same software versions throughout the workflow. Additionally, it would appear that the current scripts within CoMW are written to work with specific versions of each of the software packages covered (e.g. Trinity). What version were these scripts tested with? I tried running and ran into issues with Trinity that I think were due to the version I was trying to use. I suggest making a conda environment file (<https://conda.io/projects/conda/en/latest/user-guide/tasks/manage-environments.html>) that can be included in the Github repo to detail what version of each of the software programs should be used for the pipeline.

R8: The software has now made significantly easier by using it in conda environment and can be installed relatively easy in a separate conda container using the configuration file

<https://github.com/anwarMZ/CoMW/blob/master/CoMW.yml> as described in the updated manuscript and attached CoMW manual. Now the user has to just create a

conda environment with provided configuration file that includes all framework tools, libraries, dependencies and third-party tools along with optimized versions and Run installation file

```
> conda env create -f CoMW.yml  
> source activate CoMW  
> bash install.sh
```

Moreover, the aim of the workflow is to be modular and possible to adapt to alternative tools and databases. Though we appreciate the ease of use of Snakemake, especially for a user without expertise in python, we do not feel that this would allow for sufficient modularity. Instead CoMW is targeted to users with basic bioinformatics expertise comfortable to work in the command line, or for more advanced users with python expertise to allow changes in configuration, databases and programs used.

C8: I am perhaps missing it-- but it would appear that no quality trimming of the raw short reads was used in this study. This is generally accepted as best practice. Please explain its omission from both pipelines in the text. More broadly, I think it should be added to the CoMW workflow.

R8: The real-world dataset was trimmed as described in the cited preprints [10,11] . However, we would also like to mention in general that quality trimming is not always desirable for alignment to a protein database when only doing so for the purpose of annotation, since it can decrease sensitivity by removing informative, though erroneous bases [12]. For assembly however, a gentle trimming based on the above paper is already included in Trinity by default.

C9: The comparisons made in the paper focus primarily upon functional analysis (e.g. the identification of functional gene sets), and the simulated data set that is used is not well-suited to taxonomic data. The comparisons made in the paper are interesting and valid-- but I think that the authors should make clear that they are only really testing functional annotation and not the resolution of taxonomic annotation.

R9: We agree that the simulated datasets are not suitable for taxonomic annotation and that taxonomic annotation is outside of the scope of this paper. We have now clarified this in a paragraph regarding taxonomic annotation in the Discussion. L295 in manuscript

C10: Looking at Table 1, I am inclined to say that eggNOG does pretty well in general with or without assembly and that the other databases perform less well. Moreover, that other databases seem to be more depend upon assembly vs. not. I am not sure that this shows a clear-cut win for assembly. Additionally, how much variation might be driven by mapping approach used (Diamond) as compared to some other short read mapper/blasting.

R10: We have improved the caption of the Table 1. However, our interpretation of these results differs from the reviewer's; annotations using eggNOG are not completely comparable or similar between both approaches, since the precision drops significantly at medium and higher threshold of confidence by adding excessive false positives. Whereas, for the assembly-based approach or CoMW the precision doesn't drop at all even at a very high threshold. In Table 1 we have only added the best value for each database based on the F-scores. Please see Supplementary table 1 to have a complete view. The false positives remain less than 1% compared to 15% using assembly-free approach. Also, if one considers another mapper's than Diamond they are less or equally sensitive as Diamond. Using more sensitive tools such as SWORD without denovo assembly is not possible given the computational restraint especially for large metaT datasets.

C11: One approach used frequently in the analysis of microbial communities dominated by prokaryotes is to sequence both the metaG and metaT of the community, assemble the metaG, and then map the metaT to the assembled metaG or binned genomes from the metaG (e.g. <https://www.nature.com/articles/s41396-017->



0041-5). It seems worthwhile to discuss how your approach differs from these approaches.

R11: We agree that this is possible and might be good idea in many cases. However, with CoMW, we aim to develop a workflow applicable to pure metatranscriptomics studies, providing a resource for de novo assembly and functional analysis. This is especially relevant for environments such as soil where the high diversity and amount of metabolically active organisms means that the sequencing depth needed for metaG assembly becomes economically unfeasible for many studies, especially when, as here, microeukaryotes are also targeted.

C12: Line 69: Without a meta-analysis I am not sure that this can be stated-citation 11 only lists 5 studies that take that approach in a fairly limited subset of studies. I would remove this statement unless you have solid numbers on how many studies use assembly vs mapping approaches? Also, you should qualify your extrapolation that it is "because of less computational expense." You don't know people's rationale for choosing one pipeline over another.

R12: We agree with the reviewer's comment and have removed the statement in introduction.

C13:Line 70: Some discussion of the CAMI metagenomic comparisons (<https://data.cami-challenge.org/>) seems justified here. They did extensive comparisons of assembly approaches as well as direct taxonomic analysis of short reads. The CAMI parallels your investigation of functional gene annotation nicely.

R13: We agree and now mention CAMI in manuscript L264, though as mentioned above, CAMI has a different focus and its benchmarks are mostly out of the scope of CoMW.

C14: Line 99: It would be helpful to the reader to directly state what the 'full-length genes' are. I am assuming that they are from the genome data that were used to generate the simulated data. The language should again be clarified in Line 110. One line 110 I am not sure what "full length genes" are being referred to. Perhaps changing the term used to "gold standard" or the like would help the reader follow the logical progression better?

R14: We have now revised the language in the lines as suggested, but prefer to keep the term "full length genes". It is now better explained to improve clarity.

C15: Line 112: Define BTS score.

R15: BTS = "bit score". This is now revised.

C16: Line 116: What numerical cutoffs were used for each of the Low, Medium, and High thresholds? Are the parameters detailed somewhere? I looked at the supplemental tables-but couldn't figure out which if any columns contained these values. Apologies if I missed them.

R16: They are specified as one column in each supplementary table in supplementary file 1. However, for more clarity, we have also mentioned here

Threshold Categoryassembly-basedassembly-free

Low – TL1E-1 – 1E-5BTS 10 – 50

Medium – TM 1E-6 – 1E-10BTS 60 – 100

High – TH1E-11 – 1E-15BTS 110 – 150

C17:Line 132: Watch capitalization of your two approaches throughout the paper ("Assembly-based and assembly-free approaches"). You change around quite a bit whether or not you capitalize.

R17: We have updated for consistency all throughout the manuscript accordingly.

C18: Line 152: As with line 116, what were the parameters used in the 15 "various confidence thresholds". I think it would be helpful to add a supplemental table that specifies the confidence thresholds used.R18: The parameters for alignment were

consistent throughout the 15 confidence thresholds except the confidence threshold itself in both approaches. For the cut-off used or for the definition of the thresholds see response to comment # 16 above.

C19: Line 178: It is unclear to me how "full length" gene alignments were used for quantification? Was this based on mapping the simulated short reads against the original full-length genes that were annotated with eggNOG? Clarify in the methods or here.

R19: Yes exactly, simulated short reads were mapped back to the full-length genes (annotated using all three databases) for quantification and comparing the quantification using "assembly-based" (CoMW) and "assembly-free" methods. We have also updated in the methods for clarity.

C20: Line 204: What approach was used by Schostag? Was it assembly free? What was found by the assembly free approach?

R20: We have used assembly-based approach (CoMW) in Schostag et al. [10] as both MZA and CSJ are co-authors on the study. However, to elucidate the impact of the choice, we used "assembly-free" approach too and compared the results. Which is shown in figure 3 in manuscript

C21:Line 209: There is no Figure 6.

R21: Updated accordingly

C22:Line 209: There is no Figure 7.

R22: Updated accordingly

C23:Line 243: What was the estimated chimeric sequence frequency from your analysis of the mock datasets? What about false contigs? I would be surprised if they were terribly high as the mock data set didn't contain any species that had high average nucleotide identity.

R23: Simulated data didn't have any chimeric sequences since Polyester does not simulate chimeric reads but the real data might have chimeric sequences based upon various things such as the de novo assembler used or environment under study or the dominating species. However, these contigs can be identified and filtered based on their abundance using the optional script provided filter\_contigs\_by\_abundance.py where the user can identify a minimum threshold as a contig to not be considered as false contig based on its relative abundance to contigs pool.

C24: Line 282: Sure, I agree but do you have numbers to support this or a citation?

R24: We don't have the exact numbers to support the argument however this review [13] of metaG, metaT and metaP approaches for microbiome analysis had a similar view. They mentioned that most of the metaT analysed studies have a custom/ad-hoc built analysis pipeline which can be due to many reasons (Computational expense, lack of computational experience, mRNA quality, databases of interest etc.). We have accordingly added the citation to the argument.

C25:Line 283: What are "these pipelines"? Metatranscriptomic pipelines? Also, I am not sure if you have the data to say that the majority of analyses use assembly-free approaches.

R25: Agreed that we don't have a numerical data to confirm if the majority is using assembly-free approach so subsequently we have removed the statement.

C26: Line 324: Can you provide the parameters used in the various steps of the Metatrans pipeline? Also, do you have the scripts used to run the Metatrans pipeline? If so, they should be published somewhere (Supplemental text or GitHub repo for the paper).

R26: Metatrans package was downloaded and used from <http://www.metatrans.org/>. We cited their manuscript [9] where they had mentioned the availability in abstract. The parameters for each part of the workflow are now made available at [https://github.com/anwarMZ/CoMW\\_supp/blob/master/Metatrans\\_version\\_parameters.yml](https://github.com/anwarMZ/CoMW_supp/blob/master/Metatrans_version_parameters.yml)

C27: Line 336: Please provide the scripts used to generate the short reads.  
R27: The script used was also available in supplementary material of Martinez et al. [9] direct link -<https://media.nature.com/original/nature-assets/srep/2016/160523/srep26447/extref/srep26447-s1.doc>  
This script uses Polyester to simulate 100 samples in two groups (50 each) with varying expression.

C28: Line 341: Please clarify what "resulted in a count table and short reads with 2395 genes to add the impact of sequencing coverage" means. It is unclear to me what was produced and why only 2395 genes were recovered if 4943 were generated.  
C28: Read simulator mimics the coverage bias and thus some genes were removed

C29: Lines 342: What does knocking out genes mean in the context of short reads? How was this done? Please publish the scripts used-- I couldn't find them in the GitHub repository.

R29: Knocking out is referring to the process of removing the abundance of randomly selected 5% of genes from the simulated data. 5% genes in the table were randomly set as 0 in 5 samples in the countable in order to mimic real data. Following that BioPython was used to remove reads belonging to that genes similarly from the simulated sequence files. We have now added this script to the supplementary repository. [https://github.com/anwarMZ/CoMW\\_supp](https://github.com/anwarMZ/CoMW_supp)

C30: Line 353: Include the accession number for your simulated data set in the text as well as at the end of the paper.

R30: The information was added to the manuscript in Availability of Supporting data and Materials - Raw sequence data generated using simulation of full-length genes were deposited in the NCBI Sequence Read Archive and are accessible through BioProject accession number PRJNA509064. These reads are under the simulated Mock Communities classification of SRA

C31: Figure 1: You have "custom python scripts added in CoMW" at the bottom-but I can't see anything highlighted with that in the figure. It might be obscured because the figure is low resolution.

R31: We have improved the resolution of image. However, we don't think the "custom python scripts added in CoMW" are needed after the restructuring of manuscript and also now CoMW is easier to use for all steps after improving installation.

C32: Figure 2: Figure 2 is never referenced in the text. Also, I can't read this figure well-the text is very small and the resolution is not good. Generally, instead of plotting Log2Fold change I wonder if it would be more powerful to plot the difference relative to the Full-length gene analysis.

R32: We have improved the figure resolution and structure. However, we believe that since we want to compare both methods in relation to full-length genes and number of reads in both methods are not directly comparable, we use Log2Fold change instead of relative abundance of a transcript.

C33: Table 2: All tables should be able to stand alone with their caption without the text of the paper. This table is lacking some key information. What is the percentage column? What are the numbers (the number of orthologs retrieved with each method?) Label the letters-- specify what they are/where they are from. Check consistency in capitalization in titles. Specify that this is for eggNog? I also wonder if it would be better to report Recall/Precision values for the two different approaches as you did in Table 1- as it is a bit strange to recover more values in the assembly-based approach compared to the full-length genes but then not penalize what should be false discover.

R33: We have improved the readability of caption and tables throughout. For table 2 specifically, yes, the numbers show the unique homologs retrieved in Full length-genes and in both assembly-based and assembly-free methods. The letters were labelled in the text before, however as you correctly pointed out we have also added the full name of the letters in the table. We have also corrected the capitalization and caption. As suggested we have replaced the table 2 with Recall/Precision values in order to keep

the consistency and better understanding. As pointed out rightly, the values were misleading the fact that the False positives were not reported which is now corrected.

C34: Figures 3 and 4: The figure legends require more information: such as what is being plotted-relative abundance calculated how? Relative to all transcripts or relative to the study? It might also be interesting to add the relative abundance values that are reported in the original papers. These figures are interesting as the dynamic range of the data recovered is so different between the two different approaches. What do you think is the origin of this difference? Lack of mapping in the assembly free? Or spurious mapping of reads in the assembly free? It might be nice to add some more discussion of this in the text.

R34: Relative abundance of the functional subsystems in Figure 3 and 4 were calculated for each sample using both assembly-free and assembly-based methods. We have also updated the captions as per the reviewer has rightly pointed. Moreover, now that both manuscripts are made available at BioRxiv along with detailed supplementary methods we believe that the values can be seen for each dataset from the manuscripts. We have not added more information in order to keep clarity. We believe that our findings support our arguments that the main reason for the difference between the assembly-based and assembly-free approaches is the False positives produced by the assembly-free method. We saw that with simulated datasets it produced upto 15% False positives even with eggNOG databases which is inclusive and generic.

#### References:

1. Anwar MZ, Lanzen A, Bang-Andreasen T, Jacobsen CS. Comparative Metatranscriptomic Workflow (CoMW) [source code]. codeocean; 2019. Available from: <https://doi.org/10.24433/CO.1793842.v1>
2. Zhao Q-Y, Wang Y, Kong Y-M, Luo D, Li X, Hao P. Optimizing de novo transcriptome assembly from short-read RNA-Seq data: a comparative study. *BMC Bioinformatics*. 2011;12:S2.
3. Celaj A, Markle J, Danska J, Parkinson J. Comparison of assembly algorithms for improving rate of metatranscriptomic functional annotation. *Microbiome*. 2014;2:39.
4. Buchfink B, Xie C, Huson DH. Fast and sensitive protein alignment using DIAMOND. *Nat Methods*. 2015;12:59–60.
5. Gosalbes MJ, Durbán A, Pignatelli M, Abellan JJ, Jiménez-Hernández N, Pérez-Cobas AE, et al. Metatranscriptomic Approach to Analyze the Functional Human Gut Microbiota. *PLOS ONE*. 2011;6:e17447.
6. Abu-Ali GS, Mehta RS, Lloyd-Price J, Mallick H, Branck T, Ivey KL, et al. Metatranscriptome of human faecal microbial communities in a cohort of adult men. *Nat Microbiol*. 2018;3:356.
7. Sczyrba A, Hofmann P, Belmann P, Koslicki D, Janssen S, Dröge J, et al. Critical Assessment of Metagenome Interpretation – a benchmark of computational metagenomics software. *Nat Methods*. 2017;14:1063–71.
8. Wu Y-W, Tang Y-H, Tringe SG, Simmons BA, Singer SW. MaxBin: an automated binning method to recover individual genomes from metagenomes using an expectation-maximization algorithm. *Microbiome*. 2014;2:26.
9. Martinez X, Pozuelo M, Pascal V, Campos D, Gut I, Gut M, et al. MetaTrans: an open-source pipeline for metatranscriptomics. *Sci Rep*. 2016;6:26447.
10. Schostag MD, Anwar MZ, Jacobsen CS, Larose C, Vogel TM, Maccario L, et al. Transcriptomic responses to warming and cooling of an Arctic tundra soil microbiome. *bioRxiv*. 2019;599233.
11. Bang-Andreasen T, Anwar MZ, Lanzen A, Kjøller R, Rønn R, Ekelund F, et al. Total RNA-sequencing reveals multi-level microbial community changes and functional responses to wood ash application in agricultural and forest soil. *bioRxiv*. 2019;621557.
12. MacManes MD. On the optimal trimming of high-throughput mRNA sequence data. *Front Genet* [Internet]. 2014 [cited 2019 Apr 2];5. Available from: <https://www.frontiersin.org/articles/10.3389/fgene.2014.00013/full>
13. Aguiar-Pulido V, Huang W, Suarez-Ulloa V, Cickovski T, Mathee K, Narasimhan G. Metagenomics, Metatranscriptomics, and Metabolomics Approaches for Microbiome Analysis: Supplementary Issue: *Bioinformatics Methods and Applications for Big*

**Additional Information:****Question****Response**

Are you submitting this manuscript to a special series or article collection?

No

**Experimental design and statistics**

Yes

Full details of the experimental design and statistical methods used should be given in the Methods section, as detailed in our [Minimum Standards Reporting Checklist](#). Information essential to interpreting the data presented should be made available in the figure legends.

Have you included all the information requested in your manuscript?

**Resources**

Yes

A description of all resources used, including antibodies, cell lines, animals and software tools, with enough information to allow them to be uniquely identified, should be included in the Methods section. Authors are strongly encouraged to cite [Research Resource Identifiers](#) (RRIDs) for antibodies, model organisms and tools, where possible.

Have you included the information requested as detailed in our [Minimum Standards Reporting Checklist](#)?

**Availability of data and materials**

Yes

All datasets and code on which the conclusions of the paper rely must be either included in your submission or deposited in [publicly available repositories](#) (where available and ethically appropriate), referencing such data using a unique identifier in the references and in the “Availability of Data and Materials” section of your manuscript.

Have you have met the above requirement as detailed in our [Minimum Standards Reporting Checklist](#)?

[Click here to view linked References](#)

1 **To assemble or not to resemble – A validated Comparative Metatranscriptomics Workflow**

2 **(CoMW)**

3

4 **Authors**

5 Muhammad Zohaib Anwar<sup>1\*</sup>

6 Anders Lanzen<sup>2,3</sup>

7 Toke Bang-Andreasen<sup>1,4</sup>

8 Carsten Suhr Jacobsen<sup>1\*</sup>

9

10 **Author Affiliations**

11 1 Department of Environmental Science, Aarhus University RISØ Campus, Frederiksborgvej 399,

12 4000 Roskilde, Denmark

13 2 AZTI, Herrera Kaia, Pasaia, Spain

14 3 IKERBASQUE, Basque Foundation for Science, 48011 Bilbao, Spain

15 4 Department of Biology, University of Copenhagen, Copenhagen, Denmark

16

17 **\*Corresponding Authors:**

18 Muhammad Zohaib Anwar: [mzanwar@envs.au.dk](mailto:mzanwar@envs.au.dk)

19 Carsten Suhr Jacobsen: [csj@envs.au.dk](mailto:csj@envs.au.dk)

## 20 **Abstract**

### 21 **Background**

22 Metatranscriptomics has been used widely for investigation and quantification of microbial  
23 communities' activity in response to external stimuli. By assessing the genes expressed,  
24 metatranscriptomics provide an understanding of the interactions between different major  
25 functional guilds and the environment. Here, we present *de-novo* assembly-based Comparative  
26 Metatranscriptomics Workflow (CoMW) implemented in a modular, reproducible structure,  
27 significantly improving the annotation and quantification of metatranscriptomes.  
28 Metatranscriptomics typically utilize short sequence reads, which can either be directly aligned  
29 to external reference databases ("assembly-free approach") or first assembled into contigs  
30 before alignment ("assembly-based approach"). We also compare CoMW (assembly-based  
31 implementation) with assembly-free alternative workflow, using simulated and real-world  
32 metatranscriptomes from Arctic and Temperate terrestrial environments. We evaluate their  
33 accuracy in precision and recall using generic and specialized hierarchical protein databases.

### 34 **Results**

35 CoMW provided significantly fewer false positives resulting in more precise identification and  
36 quantification of functional genes in metatranscriptomes. Using the comprehensive database  
37 M5nr, the assembly-based approach identified genes with only 0.6% false positives at  
38 thresholds ranging from inclusive to stringent compared to the assembly-free approach yielding  
39 up to 15% false positives. Using specialized databases (Carbohydrate Active-enzyme and  
40 Nitrogen Cycle), the assembly-based approach identified and quantified genes with 3-5x less  
41 false positives. We also evaluated the impact of both approaches on real-world datasets.



## 42 **Conclusions**

43 We present an open source *de-novo* assembly-based Comparative Metatranscriptomics  
44 Workflow (CoMW). Our benchmarking findings support the argument of assembling short reads  
45 into contigs before alignment to a reference database, since this provides higher precision and  
46 minimizes false positives.

## 47 **Key Words**

48 Metatranscriptomics, Benchmarking, Assembly, Alignment, Precision, Recall, False positives

## 49 **1 Introduction**

50 Metatranscriptomics provides an unprecedented insight to complex functional dynamics of  
51 microbial communities in various environments. The method has been applied to study the  
52 microbial activity in thawing permafrost and the related biogeochemical mechanisms  
53 contributing to greenhouse gas emissions [1], and Gonzalez *et al.* [2] applied  
54 metatranscriptomics to evaluate root microbiome response to soil contamination.  
55 Metatranscriptomics has also been used to study the functional human gut microbiota [3,4].  
56 The method is typically used to identify, quantify and compare the functional response of  
57 microbial communities in natural habitats or in relation to environmental or physio-chemical  
58 impacts.

59 Using high-throughput sequencing techniques such as Illumina, metatranscriptomics offers a  
60 non PCR biased method for looking at transcriptional activity occurring within a complex and  
61 diverse microbial population at a specific point in time [5]. However, curation and annotation of  
62 this complex data has emerged as a major challenge. To date, several studies have used various  
63 analytic workflows. Typically, short sequence reads are utilized, which can either be individually  
64 aligned directly to external reference databases (hereafter “assembly-free”) or assembled into  
65 longer contiguous fragments (contigs) for alignment (hereafter “assembly-based”). Various  
66 studies have used either of these two general approaches. For example, Poulsen *et al.* [6] used  
67 an assembly-based approach. An open-source pipeline, IMP [7] also uses this approach in

68 integrated metagenomic and metatranscriptomic analyses. The assembly-free Approach has  
69 instead been used by e.g. Jung *et al.* [8], aligning short reads to reference genomes of lactic acid  
70 bacterial strains associated with the kimchi microbial community. Similarly, an open source  
71 pipeline developed by Martinez *et al.* [9] to analyse metatranscriptomics data-sets also aligns  
72 short reads directly to a protein database before annotation. The choice of either of these two  
73 alternatives for metatranscriptomics analyses may depend on lack of thorough comparisons. Since  
74 no independent and direct comparison between them has been performed presently, various  
75 metatranscriptomics analysis approaches may at times produce inconsistent observations, even  
76 if identical databases are used in the analysis. Thus, standardization of computational analysis is  
77 necessary to enable further propagation of metatranscriptomics approaches and their  
78 integration into microbial ecology research. Benchmarking provides a critical view of the  
79 efficiency and precision of different workflows and use of simulated communities for  
80 benchmarking enables the analysis to be independent of experimental variation and biases  
81 [10].

82 Here, we present Comparative Metatranscriptomic Workflow (CoMW) implemented using the  
83 *de-novo* assembly-based approach, standardized and validated for functional annotation and  
84 quantitative expression analysis. We validated the suitability of CoMW for functional analysis by  
85 comparing it to a typical assembly-free approach using simulated datasets and evaluated the  
86 accuracy of both approaches using precision, recall and False Discovery Rates (FDR). Three  
87 different protein databases were selected for this benchmarking in order to include a  
88 representative selection of three different degrees of specialization, on a range from a more  
89 inclusive database with wide coverage (universality) and low degree of expert curation, to a

90 smaller, highly curated database, with more narrow coverage: 1) M5nr [11] :-- an inclusive and  
91 comprehensive non-redundant protein database in combination with eggNOG hierarchical  
92 annotation 2) Carbohydrate-Active Enzymes (CAZymes) [12] :-- a database dedicated to  
93 describing the families of structurally-related catalytic and carbohydrate-binding modules of  
94 enzymes and 3) Nitrogen Cycling Database (NCycDB) [13] :-- a specialized and manually curated  
95 database covering only N cycle genes. Finally, in order to estimate the consistency and variance  
96 in the results caused by the choice of approach we then applied them to real world  
97 metatranscriptomes from microbial communities in 1) active-layer permafrost soil from  
98 Svalbard [14] and 2) Ash impacted Danish Forest soil [15].

## 99 **2 Findings**

### 100 **2.1 Comparative Metatranscriptomics Workflow (CoMW)**

101 We have standardized, implemented, and validated a metatranscriptomic workflow (CoMW)  
102 using de-novo assembly-based approach that can assist in analysing large metatranscriptomics  
103 data. It makes each step of the metatranscriptomic workflow straightforward and help to make  
104 these complex analyses more reproducible and the components re-useable in different  
105 contexts. The core processes such as ORF detection and alignment against the functional  
106 database are vital in any metatranscriptomic analyses and are, therefore, present uniformly in  
107 all workflows. However, since most of the tools performing these core processes are ever  
108 improving, the workflow is implemented in modular format in order to have the possibility of  
109 using alternative tools and databases if preferred or use a newer version of these tools.  
110 Modularity additionally also provides choice where optional steps can be skipped, changed or

111 even improved in a structural manner for example the scripts are designed to cater contigs  
112 from more than one assembler. In addition to core process CoMW has a couple of optional  
113 steps such as abundance based and non-coding RNA filtering which can be different in data sets  
114 from a different environment. CoMW is open source workflow written in python available at  
115 (<https://github.com/anwarMZ/CoMW>) and published as a computational capsule on codeocean  
116 [16]. An Anaconda cloud environment is created with the provided configuration file to install  
117 third-party tools and dependencies. Help regarding input, output and parameters is provided  
118 with each script and a comprehensive tutorial is presented in the GitHub repository.

## 119 **2.2 Evaluation of CoMW (assembly-based Approach) and comparison to an assembly-free**

### 120 **method**

121 In order to compare the performance of the assembly-based workflow CoMW and assembly-  
122 free approaches, we simulated community transcript data using 4943 full length genes provided  
123 by Martinez *et al.* [9]. We analysed both approaches separately and compared against direct  
124 annotation of full-length genes. The full-length genes were annotated using all three databases  
125 (M5nr, CAZy and NCycDB) independently to classify them into functional subsystems and gene  
126 families. Figure 1 shows detailed workflow of comparative analysis using both approaches.

127

128 *Figure 1: Flowchart illustrating the evaluation and benchmarking scheme used for the comparison of alternative*  
129 *approaches. Red path indicates the full-length genes workflow, Green indicates the steps in the assembly-based*  
130 *workflow CoMW and Blue indicates the steps in the assembly-free approach.*

131

### 132 **2.2.1 Functional assignment**

133 **M5nr Alignment** Full length genes of the simulated community dataset were aligned and  
134 identified into 671 unique eggNOG orthologs, belonging to 19 distinct functional subsystems  
135 (level II). At the default confidence threshold (bit score 50), the, assembly-free approach  
136 produced alignments to 820 orthologs with a precision of 85% (14.9% FPs), whereas CoMW  
137 identified 665 orthologs with a precision of 99.3% (0.6% FPs) at the default confidence threshold  
138 of 1E-5. Repeating the alignments using a gradient of 15 varying confidence thresholds for each  
139 approach (Low -  $T_L$ , Medium -  $T_M$  and High –  $T_H$ ; five thresholds / category) resulted in dissimilar  
140 performance for both approaches. The precision and recall of CoMW did not decrease below  
141 99.3% and 98.5% respectively throughout all categories whereas the assembly-free approach  
142 had a maximum precision of 96.3% at  $T_M$  and decreases to 85% at  $T_L$  and  $T_H$ . CoMW also  
143 produced fewer (only 0.6%) FPs consistently compared to the assembly-free Approach of FPs  
144 ranging from 14.9% to minimum 3.6% at highest precision. Based on F-Score the most optimal  
145 alignment for each approach is given in Table 1, whereas detailed values for precision, recall, F-  
146 Score and FDR are listed in Supplementary Table S1. We then also evaluated both approaches  
147 by selectively removing sequences belonging to a certain functional subsystem from the M5nr  
148 database in a controlled manner (segmented cross validation) in order to replicate real world  
149 metatranscriptomes where a certain functional subsystem can be completely or partially absent  
150 from the reference database. We removed four (level II) subsystems (“[D] Cell cycle control, cell  
151 division, chromosome partitioning”; “[L] Replication, recombination and repair”; “[E] Amino  
152 acid transport and metabolism” and “[R] General function prediction only” and “[S] Function

153 unknown"). The level II subsystems were randomly removed (see data availability for the script  
154 used for the removal) one at a time realigning full-length genes and simulated reads using both  
155 CoMW and assembly-free approaches to the cropped database to compare identification  
156 consistency. In each validation round, both precision and recall of CoMW were significantly  
157 higher than assembly-free approach. Recalling ability of assembly-free approach dropped  
158 significantly in this validation as compared to full database comparison. CoMW also produced  
159 less FPs as compared to assembly-free approach. Table 2 provides details for each validation  
160 cycle.

161 **CAZY Alignment** From 2395 full length genes, 500 sequences were aligned to 395 unique  
162 functional genes in the CAZY database, which belonged to 130 gene families and were further  
163 classified as seven enzyme classes. Using default confidence thresholds (BTS 50, 1E-5), the  
164 assembly-free approach identified 765 functional genes belonging to 112 unique families and  
165 six enzyme classes with a precision of 28.5% (71.4% FPs). CoMW identified 488 functional  
166 genes from CAZY database that were classified into 147 gene families from seven enzyme  
167 classes with a precision of 66% (FDR 33.9%) at the default confidence threshold. However,  
168 when we repeated the process with 15 various confidence thresholds, precision improved  
169 consistently and FPs decreased, whereas for the assembly-free approach, precision dropped  
170 significantly with increasing confidence threshold (see Table 1 and Supplementary Table S2).

171 **NCycDB Alignment** 410 out of 2395 full-length genes were aligned to this database, identified  
172 as 29 unique Nitrogen cycle genes and further belonging to 15 functional gene families in five  
173 pathways. Using default confidence thresholds, the assembly-free approach identified 1541  
174 functional genes belonging to 25 functional gene families classified into six pathways with a

175 precision of 0.9% (99% FPs). CoMW identified 42 Nitrogen cycle genes classified into 25 gene  
 176 families from six pathways with a precision of 59.5% (40.4% FPs) at a default confidence  
 177 threshold of 1E-5. Like comparisons against M5nr and CAZY we repeated the process with 15  
 178 different confidence thresholds for each approach. Precision improved significantly for CoMW  
 179 at stringent thresholds whereas for the assembly-free approach, the best precision achieved  
 180 was 5.8%. (Table 1, Supplementary Table S3).

181

182 *Table 1 Comparison of Precision, Recall, F Score and FDR for the assembly-free and the CoMW (assembly-based) approaches*  
 183 *using all three databases based on best F-Score (Full table for both approaches and databases can be seen in Table S1, S2 and*  
 184 *S3). Bold emphasizes better precision, recall, F-Score and FDR in each database between both approaches*

| Databases | Approach      | Threshold       | Threshold Category | Recall        | Precision     | F-Score       | FDR (%)        |
|-----------|---------------|-----------------|--------------------|---------------|---------------|---------------|----------------|
| eggNOG    | assembly-free | <i>BTS 120</i>  | <i>Strict [TH]</i> | <b>0.9880</b> | 0.9540        | 0.9707        | 4.5977         |
|           | CoMW          | <i>1.00E-15</i> | <i>Strict [TH]</i> | 0.9851        | <b>0.9939</b> | <b>0.9895</b> | <b>0.6006</b>  |
| CAZY      | assembly-free | <i>BTS 110</i>  | <i>Strict [TH]</i> | 0.3510        | 0.5325        | 0.4231        | 46.7433        |
|           | CoMW          | <i>1.00E-08</i> | <i>Medium [TM]</i> | <b>0.8131</b> | <b>0.7759</b> | <b>0.7940</b> | <b>22.4096</b> |
| NCycDB    | assembly-free | <i>BTS150</i>   | <i>Strict [TH]</i> | 0.1666        | 0.0581        | 0.0862        | 94.1860        |
|           | CoMW          | <i>1.00E-14</i> | <i>Strict [TH]</i> | <b>0.6666</b> | <b>0.8333</b> | <b>0.7407</b> | <b>16.6666</b> |

185

186 *Table 2 Comparison of Precision, Recall, F Score and FDR for the assembly-free and CoMW (assembly-based) approaches using*  
 187 *the selective removal of functional subsystems from eggNOG database (segmented cross-validation) to evaluate the consistency*  
 188 *of both approaches. Bold emphasizes better consistency compared to Full length genes*

| Removed Subsystem                          | Approach      | Recall        | Precision     | F-Score       | FDR (%)       |
|--------------------------------------------|---------------|---------------|---------------|---------------|---------------|
| Cell wall/membrane/envelope biogenesis [M] | assembly-free | 0.8726        | 0.9580        | 0.9133        | 4.1958        |
|                                            | CoMW          | <b>0.9792</b> | <b>0.9855</b> | <b>0.9824</b> | <b>1.4423</b> |
| Replication, recombination and repair [L]  | assembly-free | 0.8734        | 0.9588        | 0.9141        | 4.1166        |
|                                            | CoMW          | <b>0.9796</b> | <b>0.9858</b> | <b>0.9827</b> | <b>1.415</b>  |
| Amino acid transport and metabolism [E]    | assembly-free | 0.8750        | 0.9589        | 0.9150        | 4.1095        |



|                                                                   |               |               |                |               |               |
|-------------------------------------------------------------------|---------------|---------------|----------------|---------------|---------------|
|                                                                   | CoMW          | <b>0.9812</b> | <b>0.9874</b>  | <b>0.9843</b> | <b>1.2578</b> |
| General function prediction only and<br>Function unknown [R], [S] | assembly-free | 0.8933        | 0.9281         | 0.9104        | 7.1856        |
|                                                                   | CoMW          | <b>0.9884</b> | <b>0.97443</b> | <b>0.9814</b> | <b>2.5568</b> |

189

### 190 **2.2.2 Expression Quantification**

191 We also compared the ability of both approaches to quantify the expression of identified  
192 transcripts by performing differential expression analysis of two groups in simulated  
193 communities and compared against the full-length gene expression simulated. We selected  
194 three best identification thresholds for both approaches based on highest F-Score and  
195 performed differential expression analysis. This analysis for both approaches was carried out  
196 against all three databases using the most specific level of hierarchy in the respective databases  
197 in order to capture their ability to quantify expression levels of specific genes.

198 According to full-length gene alignments against eggNOG, 123 genes were significantly  
199 upregulated and 270 were significantly downregulated. According to the assembly-free  
200 Approach (with the best resulting F-Score), 73 genes were up-regulated (precision 94.5%, 5.4%  
201 FPs) and 380 (precision 65.7%, 34.2% FPs) were down regulated. whereas using the assembly-  
202 based Approach CoMW, 99 genes were identified as up-regulated (precision 94.9%, 5% FPs) and  
203 249 down-regulated (precision 97.1%, 2.8% FPs). For the CAZy database full-length genes, 81  
204 and 189 genes were identified as significantly up- and down regulated, respectively. Using the  
205 assembly-free approach 31 up-regulated (precision 19.3%, 80.6% FPs) and 137 down-regulated  
206 genes (precision 52.5%, 47.4% FPs) were identified, whereas the CoMW identified 83  
207 (precision 71%, 28.9% FPs) and 191 (precision 73.8%, 26.1% FPs), respectively- In the NCyc  
208 database expression analysis, three and 14 genes were seen as significantly up and down-

209 regulated respectively using full-length genes. According to the assembly-free approach, 26  
210 (precision 0%, 100% FPs) and 107 (precision 4.6%, 95.3% FPs) genes were up and down  
211 regulated respectively, whereas according to CoMW, three (precision 33.3%, 66.6% FPs) genes  
212 were up-regulated and 18 (precision 55.5%, 44% FPs) were down-regulated. Precision, Recall  
213 and FDR for both approaches against all three databases are available in Supplementary Table  
214 S4. Additionally, we collapsed the functional genes into functional subsystems and gene  
215 families to remove FPs produced due to identification of homologous proteins or proteins with  
216 multiple inheritance. Fold change (log<sub>2</sub> transformed) was then calculated for each  
217 subsystem/gene family. (see Figure 2)

218

219 *Figure 2: Differential Expression comparison of the assembly-free and the CoMW assembly-based approaches using*  
220 *A) M5nr database, B) NCycDB and C) CAZy database.*

221

### 222 **2.2.3 Real-World metatranscriptomes**

223 To evaluate the effect of the two approaches on real world data, two metatranscriptomes from  
224 microbial communities were studied. In the first study we investigated the transcriptional  
225 response during warming from -10 °C to 2 °C and subsequent cooling of 2 °C to -10 °C of an  
226 Arctic tundra active layer soil from Svalbard, Norway . The aim of the study was to understand  
227 taxonomic and functional shifts in microbial communities caused by climate change in the  
228 Arctic. A pronounced shift during the incubation period was noticed by Schostag *et al.* [14]  
229 which was not replicated by the assembly-free approach. However, using CoMW, we identified  
230 an increase of genes in the subsystem “[P] Inorganic ion transport and metabolism”. During  
231 cooling, CoMW also captured the upregulation and downregulation of genes related to “[J]

232 Translation, ribosomal structure and biogenesis” and “[C] Energy production and conversion”  
233 respectively (Figure 3) unlike the assembly-free approach. These findings may have implications  
234 for our understanding of carbon dioxide emission, Nitrogen cycling and plant nutrient  
235 availability in Arctic soils.

236

237 *Figure 3: Relative abundance of eggNOG functional subsystems in Arctic permafrost soil identified and quantified*  
238 *using both CoMW and the assembly-free approach compares the differences in observed functional dynamics. Blue*  
239 *dotted line represents trends using CoMW (assembly-based) whereas Red Solid line represents assembly-free*  
240 *approach*

241

242 In the second study, we investigated the effects of wood ash amendment on Danish forest soils [15].  
243 Ash was added in three different quantities (0/control, 3, 12 and 90 tonnes ash per hectare (t  
244 ha<sup>-1</sup>)) and the effect over time was analysed in soil communities at 0, 3, 30 and 100 days after  
245 ash addition. This resulted in strong effects on functional expression as seen in Figure 4. Both  
246 approaches once again displayed varying results such as changes in genes related to eggNOG  
247 functional subsystem “[W] Extracellular structures”. assembly-free approach also identified  
248 75% of genes as “[S] Function unknown” consistently unlike assembly-based.

249

250 *Figure 4: Relative abundance of eggNOG functional subsystems in Ash deposited Danish forest soil with time*  
251 *identified using both the CoMW and an assembly-free approach. Blue dotted line represents trends using CoMW*  
252 *(assembly-based) whereas Red Solid line represents assembly-free approach*

253

### 254 **3 Discussion**

255 The application of metatranscriptomics is less common than other DNA-based genomics  
256 techniques and thus most analysis pipelines are built *ad hoc* [17]. An assembly-free approach is

257 used in a few pipelines/workflows such as COMAN [18], Metatrans [9], and SAMSA2 [19] , while  
258 an assembly-based approach is used in a few such as IMP [7]. The lack of thorough  
259 benchmarking studies and standardized workflows in metatranscriptomics has made it a more  
260 challenging task to analyse the typically big datasets produced. Previous studies e.g. Zhao *et al.*  
261 & Celaj *et al.* [20,21] have compared *de-novo* sequence assemblers including Trinity  
262 [22], MetaVelvet [23], Oases [24], AbySS [25] and SOAPden-ovo [26]. Similarly, for assembly-  
263 free approach direct short read mappers have been compared thoroughly such as DIAMOND  
264 [27], BLASTX [28] and RAPSearch2 [29] but an independent comparison of the two different  
265 approaches based on including assembly or directly aligning reads (here “assembly-free”) has  
266 been lacking. Critical Assessment of Metagenomic Interpreter (CAMI) [30] is so far the most  
267 comprehensive benchmarking effort, however it lacks any similar metatranscriptomics  
268 benchmarking. IMP [7] uses an integrated approach of metagenomics and metatranscriptomics  
269 and has some overlapping areas to CoMW and can be used together due to modular approach  
270 of CoMW.

271 Using simulated samples comprised of genes collected from abundant genomes provided by  
272 Martinez *et al.*, we show that both approaches provide similarly high recall rates against the  
273 general comprehensive database M5nr. However, CoMW provided a significantly better  
274 precision and a lower false discovery rate for identification and quantification. For relatively  
275 compact and specialized databases, recall and precision drop for both approaches (especially  
276 for the most compact database NCyc). Whereas, CoMW still appeared to be more precise,  
277 meaning that fewer genes were mis-assigned against these database and significantly lower FPs  
278 were produced.

279 We have attempted to assist this decision-making for processing metatranscriptomic analysis  
280 by independently assessing the performance of the two most common approaches and provide  
281 a road map for functional annotation and expression quantification against databases ranging  
282 from inclusive to specialized. The significantly higher precision in identification and  
283 quantification for gene families and functional subsystems in simulated samples, against all  
284 three databases, confirmed that while an assembly step is challenging computationally, it holds  
285 the potential to reveal information regarding the gene expressions that is not attainable  
286 without it. Selecting a single best workflow or pipeline for all types of metatranscriptomics  
287 studies is not a straightforward affair, and we believe that choice of approach changes the  
288 outcome of study significantly as observed with real-world datasets from active-layer  
289 permafrost soil from Svalbard and Ash impacted Danish Forest soil. In addition to choosing the  
290 right workflow, combining that with the appropriate reference database is equally important to  
291 ensure the best annotation performance. With databases specialized for one or more specific  
292 environments or functional categories, the assembly-free Approach under-performs due to its  
293 inability to identify alignments to homologs in the reference database. We also show that the  
294 assembly-free Approach can increase the FDR in annotation when a database is dominant in  
295 specific functional subsystem, which can also lead to wrong estimation of fold change in  
296 expression

297 While taxonomic annotation is beyond the scope of CoMW and thus our benchmarking  
298 analyses, it is important to consider the limited value of most functional genes for and thus  
299 functional metatranscriptomics alone for structural profiling of environmental communities,  
300 due to the high rate of horizontal gene transfer (HGT) [31]. Approaches for this purpose include

301 the identification of a limited set of “phylogenetic marker genes” (eg.[32]) or “total RNA”  
302 metatranscriptomics whereby the rRNA content is retained and utilized for taxonomic analysis  
303 [33]. Though not shown here, we expect that the former approach would also benefit in  
304 accuracy from assembling mRNA to full length transcripts before classification, based on our  
305 results regarding functional diversity. The total RNA approach also benefits from custom rRNA  
306 targeted assembly [15], which may be incorporated into CoMW thanks to its modularity.

307 In summary, we present the assembly-based workflow CoMW and show that this approach  
308 results in consistently better accuracy for functional analysis of metatranscriptomics data. Our  
309 benchmarking results show that the choice of approach (assembly-free v assembly-based) and  
310 database significantly affects the quality of the identification, annotation and expression  
311 results. Given the impact of each of these variables, it is inevitable that it significantly affects  
312 the results of an individual study and comparison of across studies. We believe that the work  
313 presented here will both provide a useful tool for and assist the microbial ecology research  
314 community to make more informed decisions about the most appropriate methodological  
315 approach to analyze large metatranscriptomic datasets with improved precision.

316

## 317 **4 Methods**

### 318 ***4.1 CoMW Implementation***

319 CoMW (assembly-based) is based on four major steps: 1) *De-novo* Assembly and Mapping; 2)  
320 Filtering; 3) Gene Prediction and Alignment 4) Annotation.

321 *De-novo Assembly and Mapping* of short reads back to assembled contigs is done using Trinity  
322 [22] and BWA [34] respectively. Various tools have been developed for de-novo

323 metatranscriptome reconstruction that usually rely on graph-theory. Trinity however generates  
324 the most optimal assemblies for coding RNA reads [17,21,35]. Nevertheless, in CoMW, user can  
325 assemble short reads into contigs by any assembler preferred but it can reduce the quality of  
326 the following steps such as alignment of contigs.

327 *Filtering of Contigs* is done to remove variance in sequences/samples. Since CoMW is assembly-  
328 based, after we assemble the reads into longer contigs we also propose a 2-step filtering of the  
329 contigs to remove any chimeric or false contig made as a result of assembly or sequencing error  
330 by removing contigs that have an expression level less than a specific threshold and to remove  
331 any potential non-coding RNA contigs assembled. We can filter contig abundance data by  
332 removing all contigs with relative expression lower than a specific cut-off, e.g. 1% (selected  
333 based on dataset variance) of the number of sequences in the dataset with least number of  
334 sequences. This threshold is also flexible for different datasets and in some cases not required  
335 at all so CoMW allows user to bypass this step or change the threshold up and down based on  
336 data variation. The filtered contigs are subject to potential non-coding RNA filtration by aligning  
337 them against the RFam database [36] using infernal [37] which is a secondary-structure-aware  
338 aligner that predicts the secondary structure of RNA sequences and similarities based on the  
339 consensus structure models. Once again, the ncRNA filtering is an optional step in CoMW,  
340 though highly recommended in order to reduce FPs.

341 *Gene Prediction and Alignment* is done using Transeq from EMBOSS [38] to predict probable  
342 open reading frames (ORFs) of the contigs (customizable, by default six per contig). We used  
343 SWORD [39] as alignment tool against reference databases. SWORD can be used in parallel  
344 based on computational resources available and the aligned results are parsed and cut-off at a

345 specific confidence threshold of combination of e-value and alignment length (usually 1e-5, can  
346 be changed given the assembly distribution in datasets).

347 *Annotation* of aligned transcripts from the previous step can be done using the databases such  
348 as eggNOG which is a hierarchically structured annotation using a graph-based unsupervised  
349 clustering available algorithm to produce genome wide orthology inferences. Aligned proteins  
350 are then placed into functional subsystems based on their best hits.), CAZy which is a  
351 knowledge-based resource specialized in the Glycogenomics, and NCycDB; a Nitrogen cycle  
352 database. This results in a count table with a contig and eggNOG ortholog or CAZy gene or NCyc  
353 gene having a certain count from each sample depending upon database used. This count table  
354 can be then used for differential expression using state-of-the-art expression analysis suit such  
355 as DESeq2 [40] or its wrapper SARTools [41]. For evaluation of CoMW we used the template  
356 script provided by the SARTools for DeSeq2 analysis where we specified first group of samples  
357 as the reference samples and second group as condition with a parametric mean-variance and  
358 Benjamini & Hochberg method for P adjustment [42].

#### 359 **4.2 Assembly-free Workflow**

360 For the assembly-free approach we used the Metatrans pipeline [9], which uses FragGeneScan  
361 [43] for ORF predictions in short reads, CD-Hit [44] for gene clustering and Diamond [27] for  
362 alignment against the M5nr, CAZy and NCyc [11–13] database. We then used the same  
363 annotation script which is included in CoMW. For expression analysis gene counts were  
364 normalized between samples using the DESeq2 [40] algorithm. Significantly differentially  
365 expressed genes were analysed in SARTools [41] using parametric relationship and p-value 0.05  
366 as significance threshold. The Benjamini and Hochberg correction procedure [42] was used to



367 adjust p-value. For parameters and versions of tools used in Metatrans see supplementary  
368 GitHub repository in data availability

### 369 **4.3 Composition of Simulated Communities**

370 In this study we utilised a set of simulated communities from Martinez *et al.* [9] where they  
371 collected 4943 genes (coding regions) from five abundant microbial genomes: *Bacteroides*  
372 *vulgatus* ATCC 8482, *Ruminococcus torques* L2-14, *Faecalibacterium prausnitzii* SL3/3,  
373 *Bacteroides thetaiotaomicron* VPI-5482 and *Parabacteroides distasonis* ATCC 8503. We  
374 simulated short reads into 100 samples using Polyester [45] embedded in a script provided by  
375 Martinez *et al.* [9] at coverage of 20x which resulted in a count table and short reads with 2395  
376 genes to add the impact of sequencing coverage that the simulator mimics. The process of  
377 regulation of abundance was done by first dividing the 100 samples into two groups (“A” and  
378 “B”) and then abundance of randomly selected 10% genes was regulated up- and down up to 4-  
379 folds, in addition to this we also knocked out (0 abundance) 5% genes completely from both  
380 simulated reads and count tables. The process of selection of samples and genes was random  
381 but tracked. To include quality and coverage bias, we used the ART simulator [46] that mimics  
382 the coverage bias and thus some genes were removed to produce an equal number of reads in  
383 FASTQ format to those produced by Polyester. ART was initially trained with Hi-Seq 2500  
384 Illumina quality error model from dataset discussed above to have a consistent error bias. After  
385 simulating FASTQ files we then extracted the quality data and bound it to the FASTA files  
386 generating new FASTQ files. With the coverage bias and quality training included we had a total  
387 of 62,035,912 reads ( $310,179 \pm 3,454$  reads/sample).

#### 388 4.4 Evaluation Measures

389 We used the standard measures of precision (also named positive predictive value, PPV),  
390 accounting for how many annotations and identifications of significantly differentially  
391 expressed gene families and subsystems are correct and defined as  $\frac{TP}{TP+FP}$  and recall (also  
392 named sensitivity or true positive rate, TPR), accounting for how many correct annotations are  
393 selected, defined as  $\frac{TP}{TP+FN}$  where TP indicates the number of orthologs that have been correctly  
394 annotated, FN indicates the number of orthologs/genes/functional subsystem which are in the  
395 simulated communities but were not found by a certain approach and FP indicates the number  
396 of orthologs/genes/functional subsystem that have been wrongly annotated (because they do  
397 not appear in the simulated communities). The F-score is the harmonic mean of precision and  
398 recall, defined as  $\frac{2*Precision*Recall}{Precision+Recall}$ .

### 399 **Availability of source code and requirements**

- 400 • Project name: Comparative Metatranscriptomics Workflow (*CoMW*)
- 401 • Project home page: <https://github.com/anwarMZ/CoMW>
- 402 • Operating system(s): Platform independent
- 403 • Programming language: Python, R, and bash
- 404 • Other requirements: Requirements mentioned in detailed manual at GitHub
- 405 • License: GNU General Public License v3.0

### 406 **Availability of supporting data and materials**

- 407 • Raw sequence data generated using simulation of full-length genes were deposited in  
408 the NCBI Sequence Read Archive and are accessible through BioProject accession  
409 number PRJNA509064
- 410 • Project supplementary scripts: [https://github.com/anwarMZ/CoMW\\_supp](https://github.com/anwarMZ/CoMW_supp)
- 411 • Supplementary File 1 – Precision Recall Analysis of both approaches
- 412 • Supplementary File 2 – Differential Expression Analysis of all approaches using eggNOG  
413 database
- 414 • Supplementary File 3 – Differential Expression Analysis of all approaches using CAZy  
415 database
- 416 • Supplementary File 4 – Differential Expression Analysis of all approaches using NCyc  
417 database

### 418 **Tracking and Reproducibility**

- 419 • CoMW is published as computational capsule on codeocean and can be accessed  
420 through <https://doi.org/10.24433/CO.1793842.v1>

421 • CoMW is registered at SciCrunch.org with RRID – SCR\_017109.

422 ***List of abbreviations***

423 FDR: False Discovery Rate, FP: False Positives, TP: True Positives, FN: False Negatives, mRNA:

424 messenger RNA

425 ***Ethical Approval***

426 Not applicable

427 ***Consent for publication***

428 Not applicable

429 ***Competing Interests***

430 The authors declare that they have no competing interests.

431 ***Funding***

432 This work was supported by a grant from the European Commission’s Marie Skłodowska Curie

433 Actions program under project number 675546 (*MicroArctic*).

434 ***Author's Contributions***

435 MZA & CSJ conceived and designed the study. MZA, TBA and AL carried out the data

436 production. MZA and AL carried out analysis. MZA drafted the manuscript and AL, TBA and CSJ

437 revised and approved the final version.

438 ***Acknowledgements***

439 Authors would like to acknowledge European Commission’s MicroArctic project for the funding.

440 We would also like to thank authors of Metatrans for providing the data used for simulation.

441 Additionally, we would like to thank Robert Vaser author of Sword to make it available on

442 anaconda cloud and helping in integration with CoMW.

## 443 **References**

- 444 1. Coolen MJL, Orsi WD. The transcriptional response of microbial communities in thawing Alaskan  
445 permafrost soils. *Front Microbiol.* 2015;6.
- 446 2. Gonzalez E, Pitre FE, Pagé AP, Marleau J, Guidi Nissim W, St-Arnaud M, et al. Trees, fungi and bacteria:  
447 tripartite metatranscriptomics of a root microbiome responding to soil contamination. *Microbiome.*  
448 2018;6:53.
- 449 3. Gosalbes MJ, Durbán A, Pignatelli M, Abellan JJ, Jiménez-Hernández N, Pérez-Cobas AE, et al.  
450 Metatranscriptomic Approach to Analyze the Functional Human Gut Microbiota. *PLOS ONE.*  
451 2011;6:e17447.
- 452 4. Abu-Ali GS, Mehta RS, Lloyd-Price J, Mallick H, Branck T, Ivey KL, et al. Metatranscriptome of human  
453 faecal microbial communities in a cohort of adult men. *Nat Microbiol.* 2018;3:356.
- 454 5. Leimena MM, Ramiro-Garcia J, Davids M, van den Bogert B, Smidt H, Smid EJ, et al. A comprehensive  
455 metatranscriptome analysis pipeline and its validation using human small intestine microbiota datasets.  
456 *BMC Genomics.* 2013;14:530.
- 457 6. Poulsen M, Schwab C, Jensen BB, Engberg RM, Spang A, Canibe N, et al. Methylo-trophic  
458 methanogenic Thermoplasmata implicated in reduced methane emissions from bovine rumen. *Nat*  
459 *Commun.* 2013;4:1428.
- 460 7. Narayanasamy S, Jarosz Y, Muller EEL, Heintz-Buschart A, Herold M, Kaysen A, et al. IMP: a pipeline  
461 for reproducible reference-independent integrated metagenomic and metatranscriptomic analyses.  
462 *Genome Biol.* 2016;17:260.
- 463 8. Jung JY, Lee SH, Jin HM, Hahn Y, Madsen EL, Jeon CO. Metatranscriptomic analysis of lactic acid  
464 bacterial gene expression during kimchi fermentation. *Int J Food Microbiol.* 2013;163:171–9.
- 465 9. Martinez X, Pozuelo M, Pascal V, Campos D, Gut I, Gut M, et al. MetaTrans: an open-source pipeline  
466 for metatranscriptomics. *Sci Rep.* 2016;6:26447.
- 467 10. Almeida A, Mitchell AL, Tarkowska A, Finn RD. Benchmarking taxonomic assignments based on 16S  
468 rRNA gene profiling of the microbiota from commonly sampled environments. *GigaScience.* 2018;7.
- 469 11. Wilke A, Harrison T, Wilkening J, Field D, Glass EM, Kyrpides N, et al. The M5nr: a novel non-  
470 redundant database containing protein sequences and annotations from multiple sources and  
471 associated tools. *BMC Bioinformatics.* 2012;13:141.
- 472 12. Cantarel BL, Coutinho PM, Rancurel C, Bernard T, Lombard V, Henrissat B. The Carbohydrate-Active  
473 EnZymes database (CAZy): an expert resource for Glycogenomics. *Nucleic Acids Res.* 2009;37:D233-238.
- 474 13. Tu Q, Lin L, Cheng L, Deng Y, He Z. NCycDB: a curated integrative database for fast and accurate  
475 metagenomic profiling of nitrogen cycling genes. *Bioinforma Oxf Engl.* 2018;
- 476 14. Schostag MD, Anwar MZ, Jacobsen CS, Larose C, Vogel TM, Maccario L, et al. Transcriptomic  
477 responses to warming and cooling of an Arctic tundra soil microbiome. *bioRxiv.* 2019;599233.

- 478 15. Bang-Andreasen T, Anwar MZ, Lanzen A, Kjølner R, Rønn R, Ekelund F, et al. Total RNA-sequencing  
479 reveals multi-level microbial community changes and functional responses to wood ash application in  
480 agricultural and forest soil. *bioRxiv*. 2019;621557.
- 481 16. Anwar MZ, Lanzen A, Bang-Andreasen T, Jacobsen CS. Comparative Metatranscriptomic Workflow  
482 (CoMW) [source code]. *codeocean*; 2019. Available from: <https://doi.org/10.24433/CO.1793842.v1>
- 483 17. Aguiar-Pulido V, Huang W, Suarez-Ulloa V, Cickovski T, Mathee K, Narasimhan G. Metagenomics,  
484 Metatranscriptomics, and Metabolomics Approaches for Microbiome Analysis: Supplementary Issue:  
485 Bioinformatics Methods and Applications for Big Metagenomics Data. *Evol Bioinforma*.  
486 2016;12s1:EBO.S36436.
- 487 18. Ni Y, Li J, Panagiotou G. COMAN: a web server for comprehensive metatranscriptomics analysis. *BMC*  
488 *Genomics*. 2016;17:622.
- 489 19. Westreich ST, Treiber ML, Mills DA, Korf I, Lemay DG. SAMSA2: a standalone metatranscriptome  
490 analysis pipeline. *BMC Bioinformatics*. 2018;19:175.
- 491 20. Zhao Q-Y, Wang Y, Kong Y-M, Luo D, Li X, Hao P. Optimizing de novo transcriptome assembly from  
492 short-read RNA-Seq data: a comparative study. *BMC Bioinformatics*. 2011;12:S2.
- 493 21. Celaj A, Markle J, Danska J, Parkinson J. Comparison of assembly algorithms for improving rate of  
494 metatranscriptomic functional annotation. *Microbiome*. 2014;2:39.
- 495 22. Grabherr MG, Haas BJ, Yassour M, Levin JZ, Thompson DA, Amit I, et al. Trinity: reconstructing a full-  
496 length transcriptome without a genome from RNA-Seq data. *Nat Biotechnol*. 2011;29:644–52.
- 497 23. Namiki T, Hachiya T, Tanaka H, Sakakibara Y. MetaVelvet: an extension of Velvet assembler to de  
498 novo metagenome assembly from short sequence reads. *Nucleic Acids Res*. 2012;40:e155.
- 499 24. Schulz MH, Zerbino DR, Vingron M, Birney E. Oases: robust de novo RNA-seq assembly across the  
500 dynamic range of expression levels. *Bioinformatics*. 2012;28:1086–92.
- 501 25. Simpson JT, Wong K, Jackman SD, Schein JE, Jones SJM, Birol I. ABySS: A parallel assembler for short  
502 read sequence data. *Genome Res*. 2009;19:1117–23.
- 503 26. Luo R, Liu B, Xie Y, Li Z, Huang W, Yuan J, et al. SOAPdenovo2: an empirically improved memory-  
504 efficient short-read de novo assembler. *GigaScience*. 2012;1:18.
- 505 27. Buchfink B, Xie C, Huson DH. Fast and sensitive protein alignment using DIAMOND. *Nat Methods*.  
506 2015;12:59–60.
- 507 28. Altschul SF, Gish W, Miller W, Myers EW, Lipman DJ. Basic local alignment search tool. *J Mol Biol*.  
508 1990;215:403–10.
- 509 29. Zhao Y, Tang H, Ye Y. RAPSearch2: a fast and memory-efficient protein similarity search tool for next-  
510 generation sequencing data. *Bioinformatics*. 2012;28:125–6.

- 511 30. Sczyrba A, Hofmann P, Belmann P, Koslicki D, Janssen S, Dröge J, et al. Critical Assessment of  
512 Metagenome Interpretation – a benchmark of computational metagenomics software. *Nat Methods*.  
513 2017;14:1063–71.
- 514 31. Simonson AB, Servin JA, Skophammer RG, Herbold CW, Rivera MC, Lake JA. Decoding the genomic  
515 tree of life. *Proc Natl Acad Sci U S A*. 2005;102:6608–13.
- 516 32. Segata N, Izard J, Waldron L, Gevers D, Miropolsky L, Garrett WS, et al. Metagenomic biomarker  
517 discovery and explanation. *Genome Biol*. 2011;12:R60.
- 518 33. Urich T, Lanzén A, Qi J, Huson DH, Schleper C, Schuster SC. Simultaneous Assessment of Soil  
519 Microbial Community Structure and Function through Analysis of the Meta-Transcriptome. *PLoS ONE*.  
520 2008;3.
- 521 34. Li H, Durbin R. Fast and accurate short read alignment with Burrows–Wheeler transform.  
522 *Bioinformatics*. 2009;25:1754–60.
- 523 35. Lau MCY, Harris RL, Oh Y, Yi MJ, Behmard A, Onstott TC. Taxonomic and Functional Compositions  
524 Impacted by the Quality of Metatranscriptomic Assemblies. *Front Microbiol*. 2018;9.
- 525 36. Griffiths-Jones S, Bateman A, Marshall M, Khanna A, Eddy SR. Rfam: an RNA family database. *Nucleic  
526 Acids Res*. 2003;31:439–41.
- 527 37. Nawrocki EP, Eddy SR. Infernal 1.1: 100-fold faster RNA homology searches. *Bioinformatics*.  
528 2013;29:2933–5.
- 529 38. Rice P, Longden I, Bleasby A. EMBOSS: The European Molecular Biology Open Software Suite. *Trends  
530 Genet*. 2000;16:276–7.
- 531 39. Vaser R, Pavlović D, Šikić M. SWORD—a highly efficient protein database search. *Bioinformatics*.  
532 2016;32:i680–4.
- 533 40. Love MI, Huber W, Anders S. Moderated estimation of fold change and dispersion for RNA-seq data  
534 with DESeq2. *Genome Biol*. 2014;15.
- 535 41. Varet H, Brillet-Guéguen L, Coppée J-Y, Dillies M-A. SARTools: A DESeq2- and EdgeR-Based R Pipeline  
536 for Comprehensive Differential Analysis of RNA-Seq Data. *PLOS ONE*. 2016;11:e0157022.
- 537 42. Benjamini Y, Hochberg Y. Controlling the False Discovery Rate: A Practical and Powerful Approach to  
538 Multiple Testing. *J R Stat Soc Ser B Methodol*. 1995;57:289–300.
- 539 43. Rho M, Tang H, Ye Y. FragGeneScan: predicting genes in short and error-prone reads. *Nucleic Acids  
540 Res*. 2010;38:e191.
- 541 44. Li W, Godzik A. Cd-hit: a fast program for clustering and comparing large sets of protein or  
542 nucleotide sequences. *Bioinforma Oxf Engl*. 2006;22:1658–9.
- 543 45. Frazee AC, Jaffe AE, Langmead B, Leek JT. Polyester: simulating RNA-seq datasets with differential  
544 transcript expression. *Bioinformatics*. 2015;31:2778–84.

545 46. Huang W, Li L, Myers JR, Marth GT. ART: a next-generation sequencing read simulator.  
546 *Bioinformatics*. 2012;28:593–4.



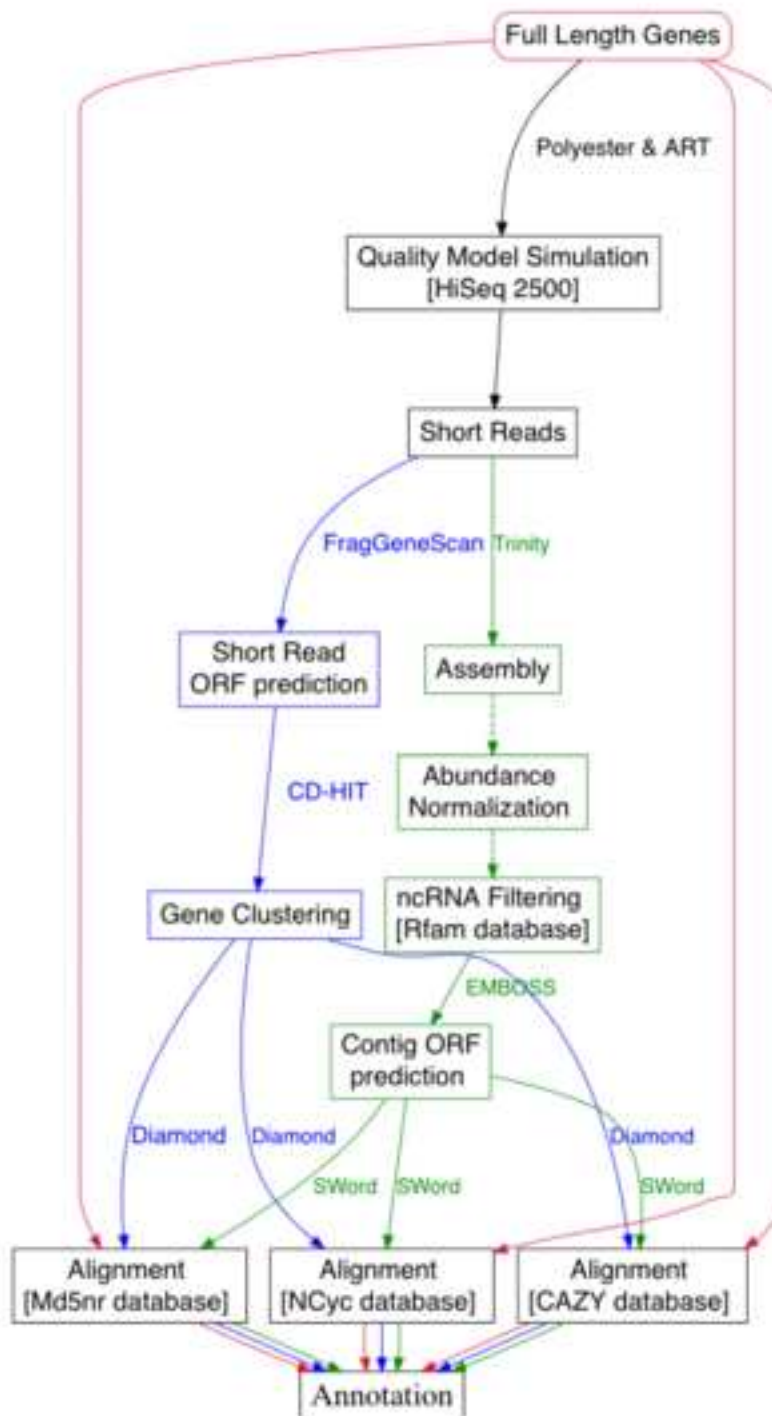

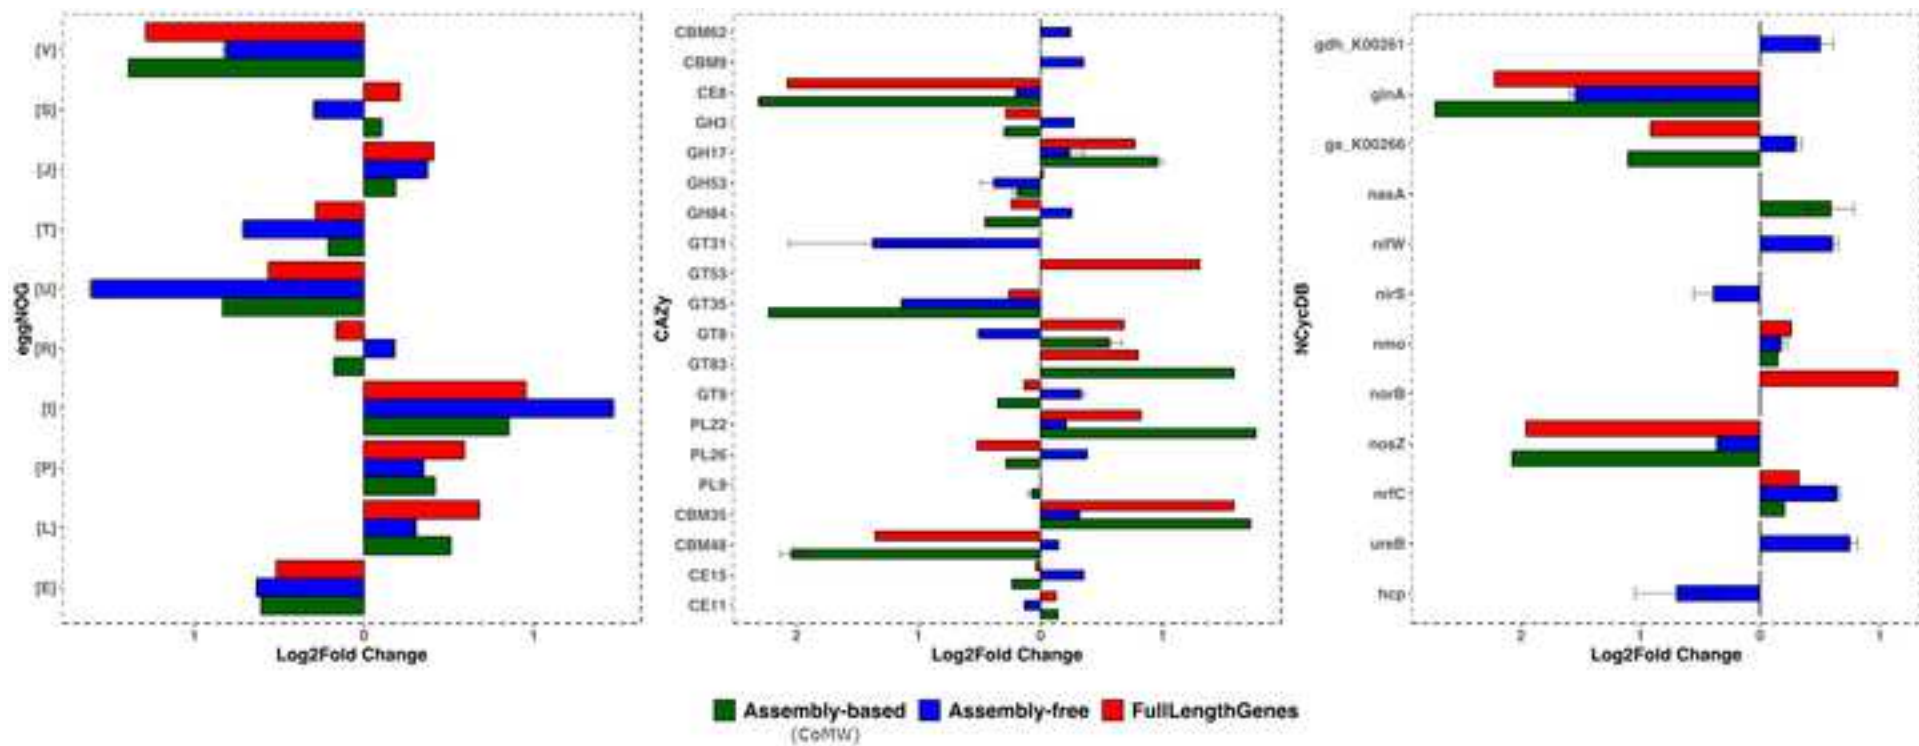

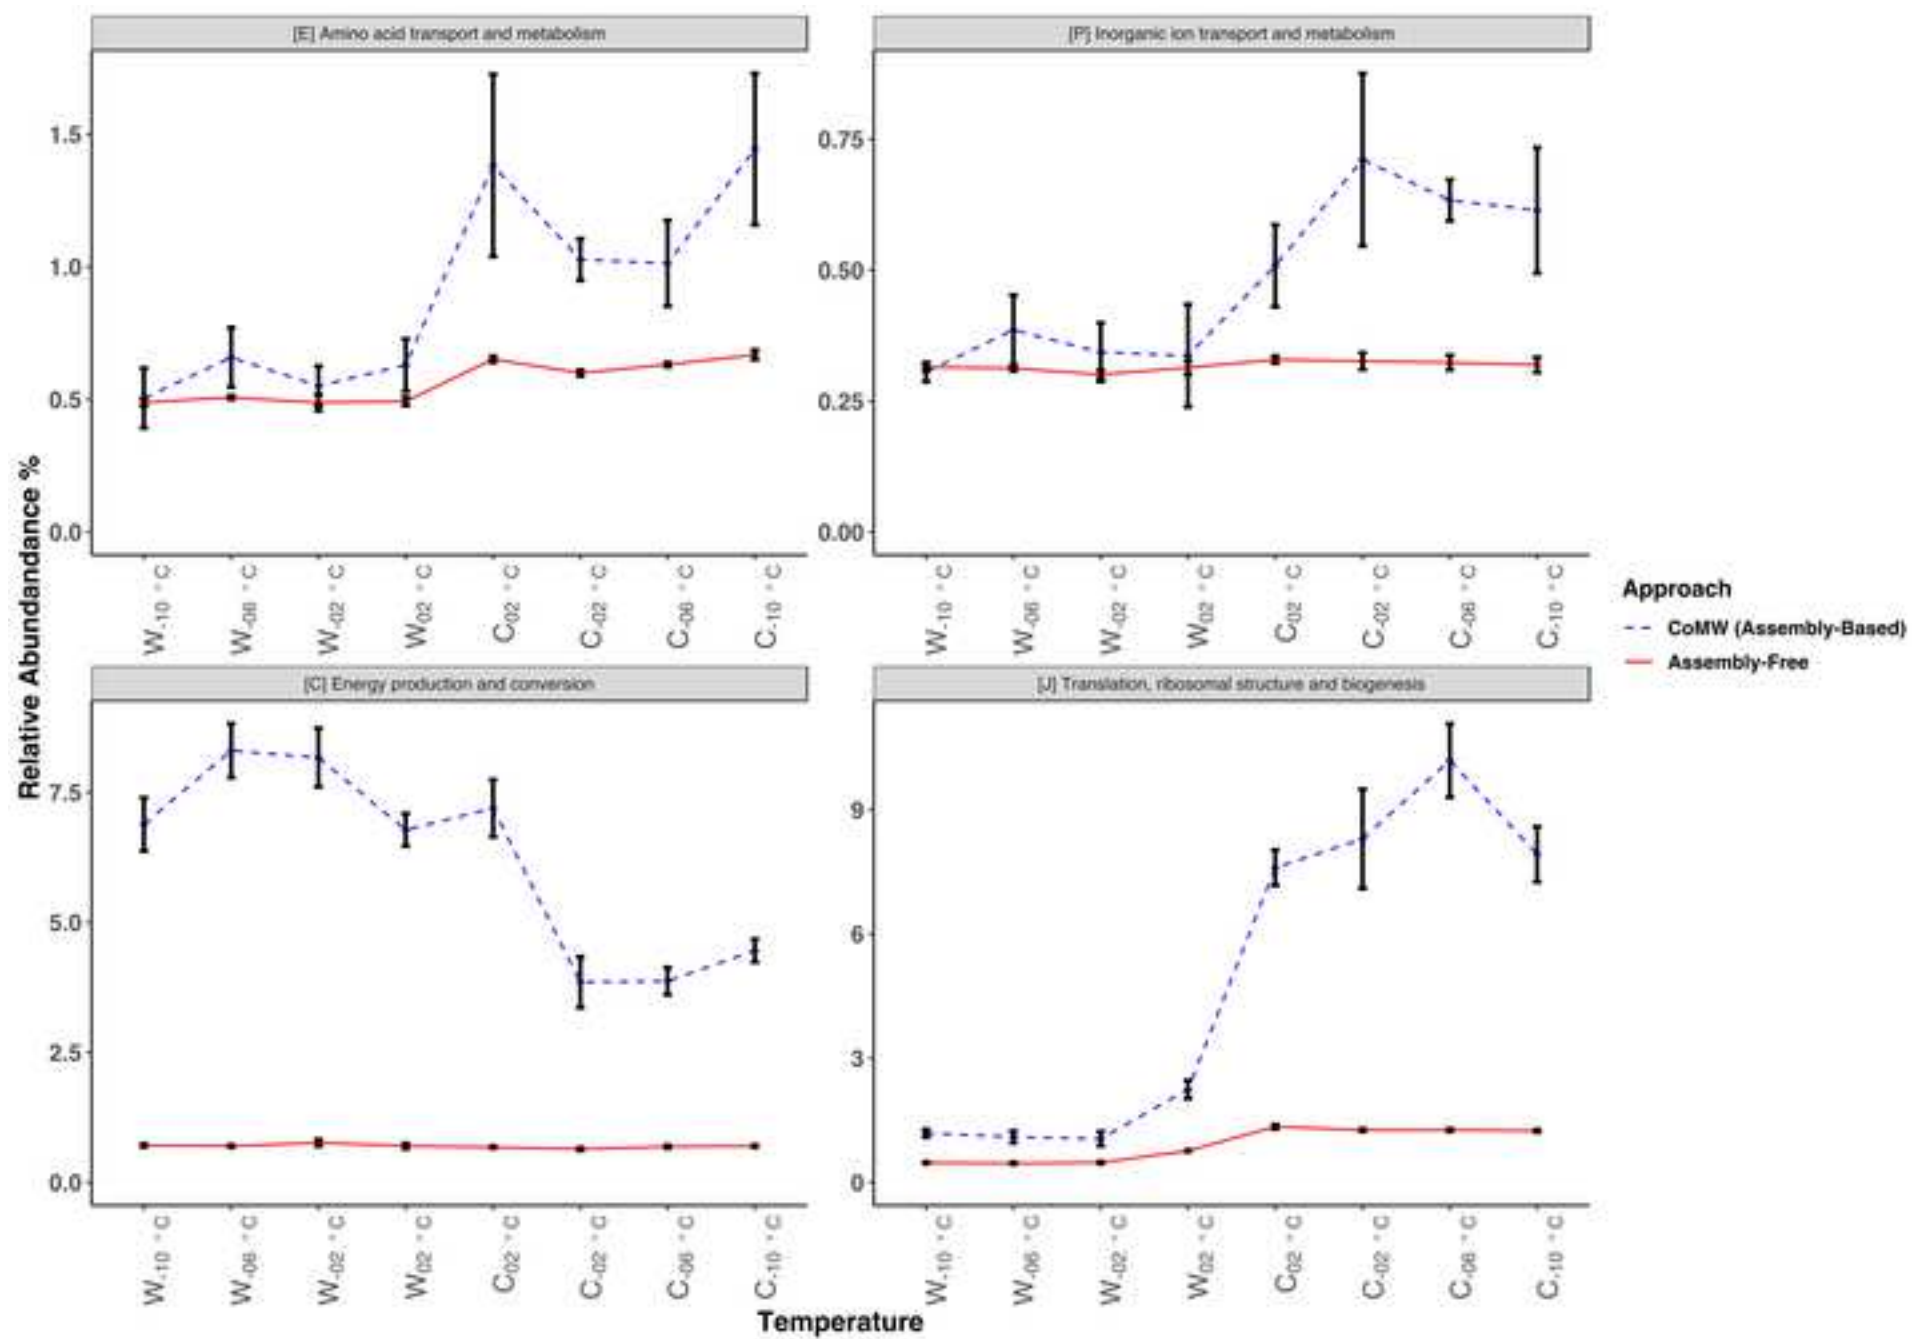

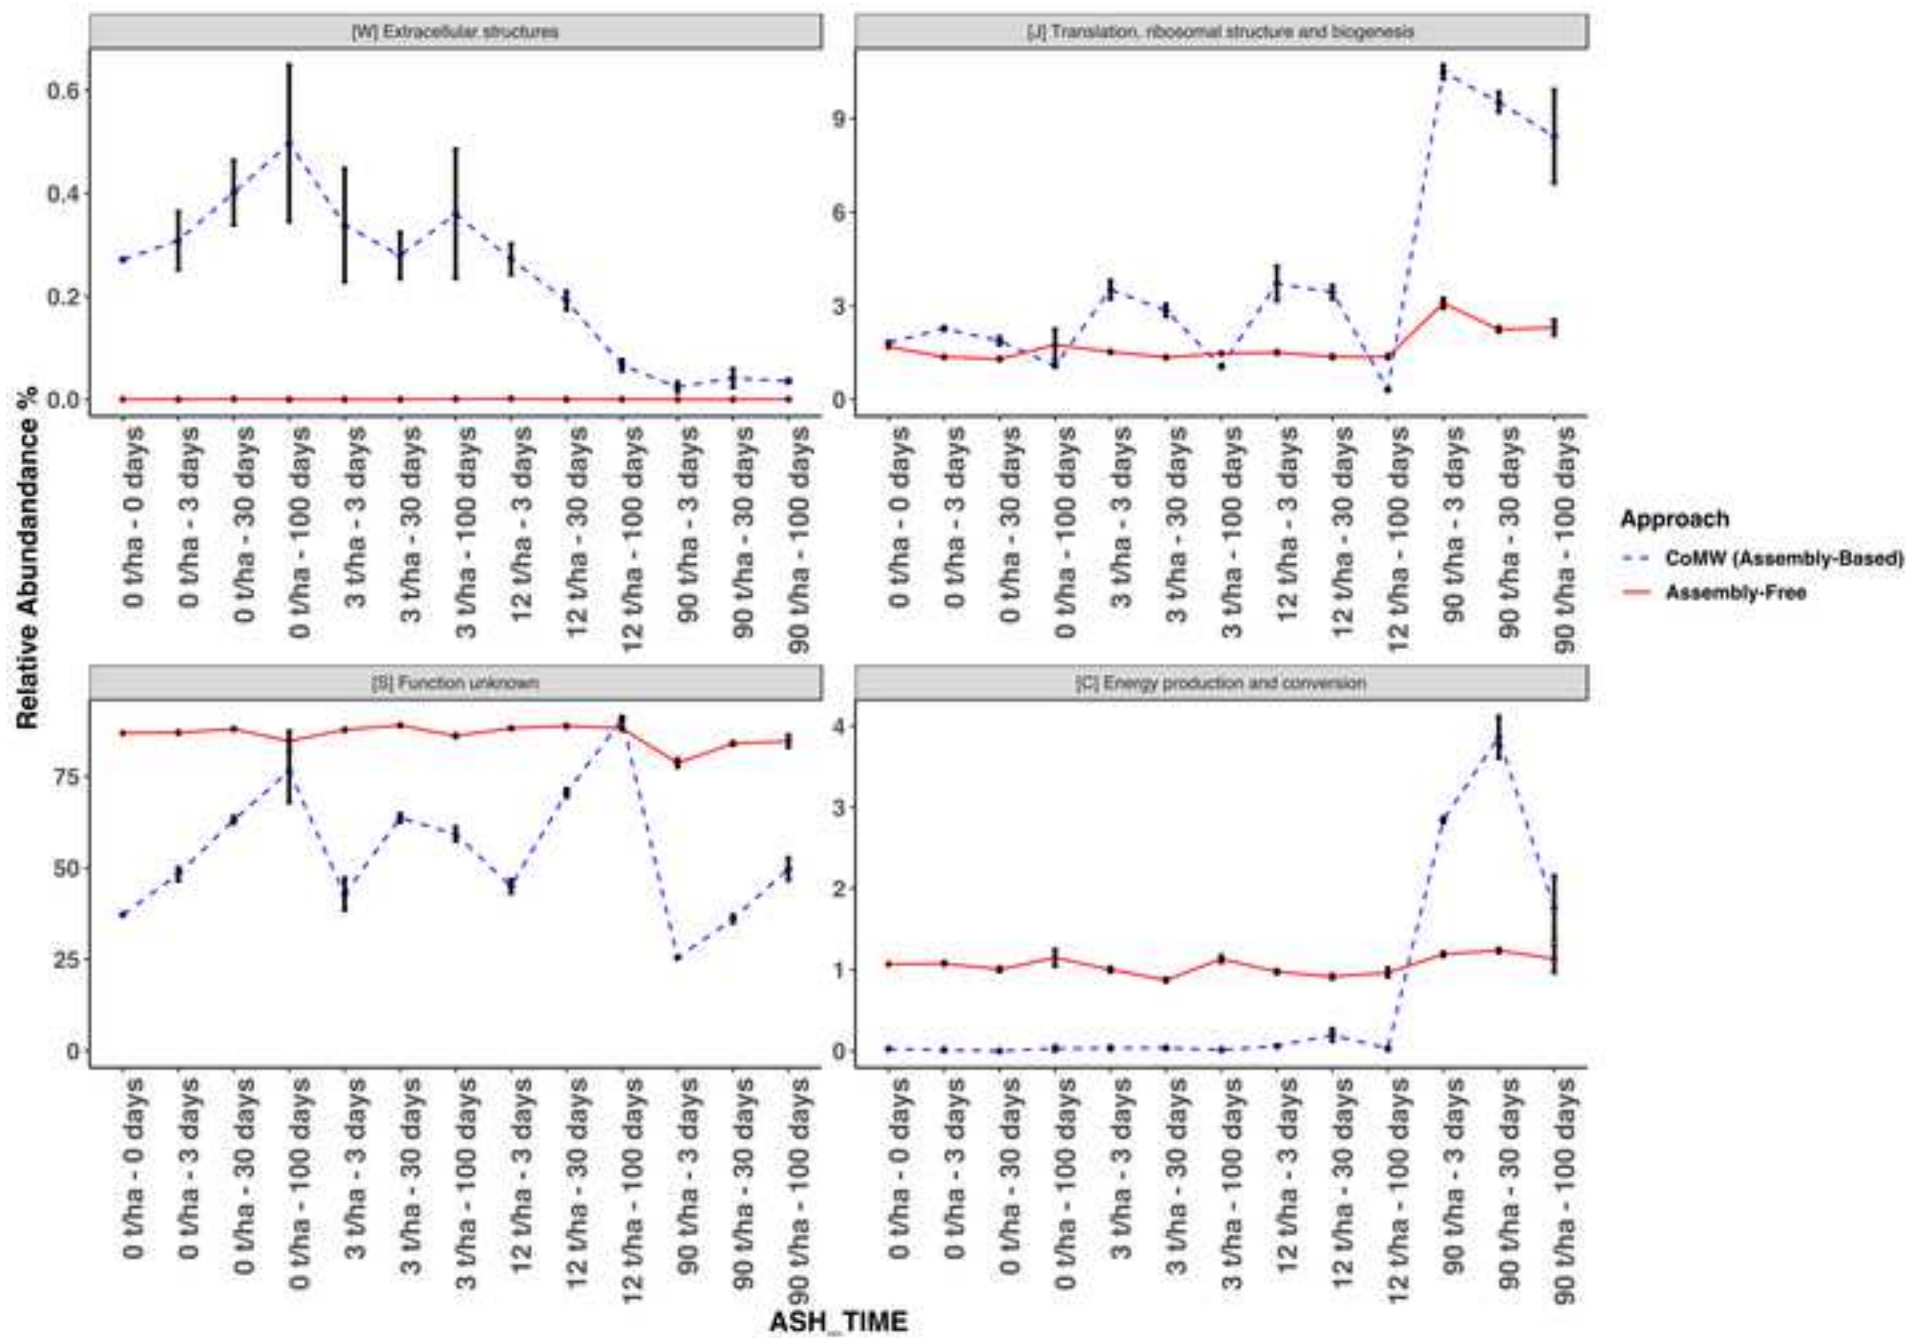

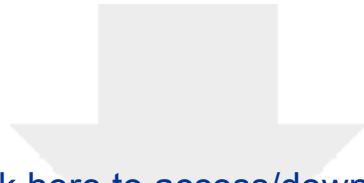

[Click here to access/download](#)

**Supplementary Material**

SupplementaryFile1\_PrecisionRecall.docx

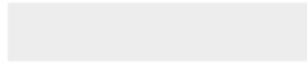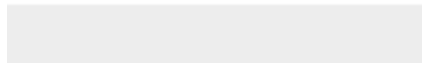

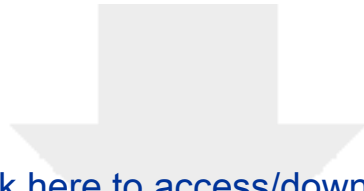

[Click here to access/download](#)

**Supplementary Material**

[SupplementaryFile2\\_eggNOG\\_DEAnalysis.xlsx](#)

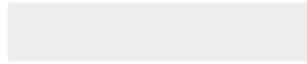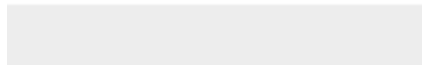



[Click here to access/download](#)

**Supplementary Material**

[SupplementaryFile3\\_CAzy\\_DEAnalysis.xlsx](#)

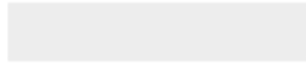



[Click here to access/download](#)

**Supplementary Material**

[SupplementaryFile4\\_NCyC\\_DEAnalysis.xlsx](#)

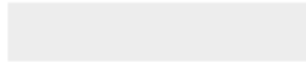



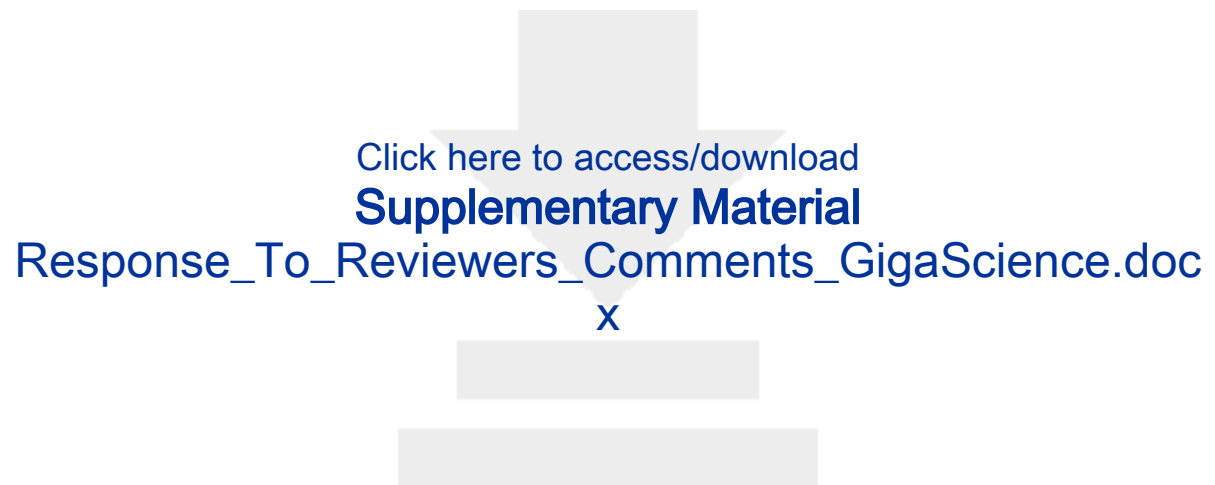

To: Editor, *GigaScience*

Re: Submission of a revised-manuscript GIGA-D-19-00009 to *GigaScience* in response to review received on 26 February 2019

We thank the editor and the reviewers for all the comments and the time and effort that have put into our submission. We believe that they provided huge guidance for improving the manuscript and reproducibility of this study and thus we have attempted to address every comment and provide responses in tabular form, please see attached. We have agreed to most of the concerns raised by the reviewers and have addressed them individually but we also have replied reasons where we feel the response is currently out of scope of the study.

In response to the major concerns that were summarized from the reviewers' comments we have spent significant efforts to firstly, make CoMW workflow easy to install and use with the anaconda configuration file provided, details of which are addressed in the response file. Secondly, in response to a healthy feedback from the reviewers we have also restructured the manuscript which we believe has improved the clarity and cohesion of the manuscript for readers of *GigaScience*.

Additionally, we have also spent considerable effort on improving data availability, reproducibility and dissemination of our results. We have made a supplementary GitHub repository as suggested by the reviewer 2 to include the scripts and parameters used by in benchmarking and generation of simulated data. As suggested we have also published CoMW as peer-reviewed compute capsule at oceancode and registered at scicrunch.org. Please see in the data availability below.

Finally, we have also made the manuscripts cited as under-review available at BioRxiv as pre-prints as asked by the editor and reviewers. This will further increase the understanding of real-world metatranscriptomes used in this manuscript and as pointed out by the Reviewer 2, detailed results and analyses of these metatranscriptomes is also available for the readers which further signifies our commitment to open and reproducible research.

Lastly, we have addressed all major and minor revision points in the manuscript and with the improvements and restructuring done we believe that the attached revised manuscript along with the Comparative Metatranscriptomics Workflow (CoMW) will be an appropriate for readers of *GigaScience*. We can

Environmental  
microbiology &  
biotechnology

Muhammad Zohaib Anwar  
PhD Student

Date: 15 May 2019

E-mail:  
mzanwar@envs.au.dk  
Web:  
au.dk/en/mzanwar@envs

Sender's CVR no.:  
31119103

Page 1/2

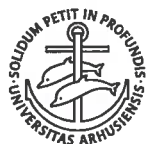

Environmental microbiology &  
biotechnology  
Aarhus University  
Frederiksborgvej 399  
PO box 358  
DK-4000 Roskilde  
Denmark

Tel.: +45 8715 0000  
Fax: +45 8715 5010  
E-mail: envs@au.dk  
Web: envs.au.dk/en

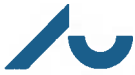

confirm this manuscript presents material that has not previously been published and is not under consideration for publication elsewhere and all authors have seen and approved the revised version submitted.

Data availability:

- Raw sequence data generated using simulation of full-length genes were deposited in the NCBI Sequence Read Archive and are accessible through BioProject accession number PRJNA509064
- Project home page: <https://github.com/anwarMZ/CoMW>
- Project supplementary scripts: [https://github.com/anwarMZ/CoMW\\_supp](https://github.com/anwarMZ/CoMW_supp)
- CoMW is published as a per-reviewed compute capsule at oceancode <https://doi.org/10.24433/CO.1793842.v1>
- Scicrunch RRID - SCR\_017109

Once again, we would like to thank you for considering our manuscript in *GigaScience*. Please do not hesitate to contact us, should you have further questions.

Best regards,  
on behalf of all authors

A handwritten signature in blue ink, appearing to read 'Zohaib Anwar'.

Muhammad Zohaib Anwar
