# Supplementary material for: To assemble or not to resemble—A validated Comparative Metatranscriptomics Workflow (CoMW)
Source: PubMed Central journal article supplement (PMC6667343; doi:10.1093/gigascience/giz096), 2019-07-30
Supplement: giz096_giga-d-19-00009_revision_2.pdf [file giz096_giga-d-19-00009_revision_2.pdf]

# GigaScience

## To assemble or not to resemble – A validated Comparative Metatranscriptomics Workflow (CoMW) --Manuscript Draft--

|                                                      |                                                                                                                                                                                                                                                                                                                                                                                                                                                                                                                                                                                                                                                                                                                                                                                                                                                                                                                                                                                                                                                                                                                                                                                                                                                                                                                                                                                                                                                                                                                                                                                                                                                                                                                                                                                                                                                                                                                                                                                                                                                                                                                                                        |                             |
|------------------------------------------------------|--------------------------------------------------------------------------------------------------------------------------------------------------------------------------------------------------------------------------------------------------------------------------------------------------------------------------------------------------------------------------------------------------------------------------------------------------------------------------------------------------------------------------------------------------------------------------------------------------------------------------------------------------------------------------------------------------------------------------------------------------------------------------------------------------------------------------------------------------------------------------------------------------------------------------------------------------------------------------------------------------------------------------------------------------------------------------------------------------------------------------------------------------------------------------------------------------------------------------------------------------------------------------------------------------------------------------------------------------------------------------------------------------------------------------------------------------------------------------------------------------------------------------------------------------------------------------------------------------------------------------------------------------------------------------------------------------------------------------------------------------------------------------------------------------------------------------------------------------------------------------------------------------------------------------------------------------------------------------------------------------------------------------------------------------------------------------------------------------------------------------------------------------------|-----------------------------|
| <b>Manuscript Number:</b>                            | GIGA-D-19-00009R2                                                                                                                                                                                                                                                                                                                                                                                                                                                                                                                                                                                                                                                                                                                                                                                                                                                                                                                                                                                                                                                                                                                                                                                                                                                                                                                                                                                                                                                                                                                                                                                                                                                                                                                                                                                                                                                                                                                                                                                                                                                                                                                                      |                             |
| <b>Full Title:</b>                                   | To assemble or not to resemble – A validated Comparative Metatranscriptomics Workflow (CoMW)                                                                                                                                                                                                                                                                                                                                                                                                                                                                                                                                                                                                                                                                                                                                                                                                                                                                                                                                                                                                                                                                                                                                                                                                                                                                                                                                                                                                                                                                                                                                                                                                                                                                                                                                                                                                                                                                                                                                                                                                                                                           |                             |
| <b>Article Type:</b>                                 | Technical Note                                                                                                                                                                                                                                                                                                                                                                                                                                                                                                                                                                                                                                                                                                                                                                                                                                                                                                                                                                                                                                                                                                                                                                                                                                                                                                                                                                                                                                                                                                                                                                                                                                                                                                                                                                                                                                                                                                                                                                                                                                                                                                                                         |                             |
| <b>Funding Information:</b>                          | H2020 Marie Skłodowska-Curie Actions (675546)                                                                                                                                                                                                                                                                                                                                                                                                                                                                                                                                                                                                                                                                                                                                                                                                                                                                                                                                                                                                                                                                                                                                                                                                                                                                                                                                                                                                                                                                                                                                                                                                                                                                                                                                                                                                                                                                                                                                                                                                                                                                                                          | Prof. Carsten Suhr Jacobsen |
| <b>Abstract:</b>                                     | <p>Background</p> <p>Metatranscriptomics has been used widely for investigation and quantification of microbial communities' activity in response to external stimuli. By assessing the genes expressed, metatranscriptomics provide an understanding of the interactions between different major functional guilds and the environment. Here, we present de-novo assembly-based Comparative Metatranscriptomics Workflow (CoMW) implemented in a modular, reproducible structure, significantly improving the annotation and quantification of metatranscriptomes. Metatranscriptomics typically utilize short sequence reads, which can either be directly aligned to external reference databases ("assembly-free approach") or first assembled into contigs before alignment ("assembly-based approach"). We also compare CoMW (assembly-based implementation) with assembly-free alternative workflow, using simulated and real-world metatranscriptomes from Arctic and Temperate terrestrial environments. We evaluate their accuracy in precision and recall using generic and specialized hierarchical protein databases.</p> <p>Results</p> <p>CoMW provided significantly fewer false positives resulting in more precise identification and quantification of functional genes in metatranscriptomes. Using the comprehensive database M5nr, the assembly-based approach identified genes with only 0.6% false positives at thresholds ranging from inclusive to stringent compared to the assembly-free approach yielding up to 15% false positives. Using specialized databases (Carbohydrate Active-enzyme and Nitrogen Cycle), the assembly-based approach identified and quantified genes with 3-5x less false positives. We also evaluated the impact of both approaches on real-world datasets.</p> <p>Conclusions</p> <p>We present an open source de-novo assembly-based Comparative Metatranscriptomics Workflow (CoMW). Our benchmarking findings support the argument of assembling short reads into contigs before alignment to a reference database, since this provides higher precision and minimizes false positives.</p> |                             |
| <b>Corresponding Author:</b>                         | Muhammad Zohaib Anwar<br>Aarhus University<br>Roskilde, Copenhagen DENMARK                                                                                                                                                                                                                                                                                                                                                                                                                                                                                                                                                                                                                                                                                                                                                                                                                                                                                                                                                                                                                                                                                                                                                                                                                                                                                                                                                                                                                                                                                                                                                                                                                                                                                                                                                                                                                                                                                                                                                                                                                                                                             |                             |
| <b>Corresponding Author Secondary Information:</b>   |                                                                                                                                                                                                                                                                                                                                                                                                                                                                                                                                                                                                                                                                                                                                                                                                                                                                                                                                                                                                                                                                                                                                                                                                                                                                                                                                                                                                                                                                                                                                                                                                                                                                                                                                                                                                                                                                                                                                                                                                                                                                                                                                                        |                             |
| <b>Corresponding Author's Institution:</b>           | Aarhus University                                                                                                                                                                                                                                                                                                                                                                                                                                                                                                                                                                                                                                                                                                                                                                                                                                                                                                                                                                                                                                                                                                                                                                                                                                                                                                                                                                                                                                                                                                                                                                                                                                                                                                                                                                                                                                                                                                                                                                                                                                                                                                                                      |                             |
| <b>Corresponding Author's Secondary Institution:</b> |                                                                                                                                                                                                                                                                                                                                                                                                                                                                                                                                                                                                                                                                                                                                                                                                                                                                                                                                                                                                                                                                                                                                                                                                                                                                                                                                                                                                                                                                                                                                                                                                                                                                                                                                                                                                                                                                                                                                                                                                                                                                                                                                                        |                             |
| <b>First Author:</b>                                 | Muhammad Zohaib Anwar                                                                                                                                                                                                                                                                                                                                                                                                                                                                                                                                                                                                                                                                                                                                                                                                                                                                                                                                                                                                                                                                                                                                                                                                                                                                                                                                                                                                                                                                                                                                                                                                                                                                                                                                                                                                                                                                                                                                                                                                                                                                                                                                  |                             |
| <b>First Author Secondary Information:</b>           |                                                                                                                                                                                                                                                                                                                                                                                                                                                                                                                                                                                                                                                                                                                                                                                                                                                                                                                                                                                                                                                                                                                                                                                                                                                                                                                                                                                                                                                                                                                                                                                                                                                                                                                                                                                                                                                                                                                                                                                                                                                                                                                                                        |                             |
| <b>Order of Authors:</b>                             | Muhammad Zohaib Anwar<br>Anders Lanzen                                                                                                                                                                                                                                                                                                                                                                                                                                                                                                                                                                                                                                                                                                                                                                                                                                                                                                                                                                                                                                                                                                                                                                                                                                                                                                                                                                                                                                                                                                                                                                                                                                                                                                                                                                                                                                                                                                                                                                                                                                                                                                                 |                             |

|                                                                                                                                                                                                                                                                                                                                                                                                                                                                                                             |                                                                                                                           |
|-------------------------------------------------------------------------------------------------------------------------------------------------------------------------------------------------------------------------------------------------------------------------------------------------------------------------------------------------------------------------------------------------------------------------------------------------------------------------------------------------------------|---------------------------------------------------------------------------------------------------------------------------|
|                                                                                                                                                                                                                                                                                                                                                                                                                                                                                                             | Toke Bang-Andreasen                                                                                                       |
|                                                                                                                                                                                                                                                                                                                                                                                                                                                                                                             | Carsten Suhr Jacobsen                                                                                                     |
| <b>Order of Authors Secondary Information:</b>                                                                                                                                                                                                                                                                                                                                                                                                                                                              |                                                                                                                           |
| <b>Response to Reviewers:</b>                                                                                                                                                                                                                                                                                                                                                                                                                                                                               | As asked by the editor, I have added the reference to the GigaDB dataset attached to the publication and cited it in text |
| <b>Additional Information:</b>                                                                                                                                                                                                                                                                                                                                                                                                                                                                              |                                                                                                                           |
| <b>Question</b>                                                                                                                                                                                                                                                                                                                                                                                                                                                                                             | <b>Response</b>                                                                                                           |
| Are you submitting this manuscript to a special series or article collection?                                                                                                                                                                                                                                                                                                                                                                                                                               | No                                                                                                                        |
| <b>Experimental design and statistics</b>                                                                                                                                                                                                                                                                                                                                                                                                                                                                   | Yes                                                                                                                       |
| <p>Full details of the experimental design and statistical methods used should be given in the Methods section, as detailed in our <a href="#">Minimum Standards Reporting Checklist</a>. Information essential to interpreting the data presented should be made available in the figure legends.</p> <p>Have you included all the information requested in your manuscript?</p>                                                                                                                           |                                                                                                                           |
| <b>Resources</b>                                                                                                                                                                                                                                                                                                                                                                                                                                                                                            | Yes                                                                                                                       |
| <p>A description of all resources used, including antibodies, cell lines, animals and software tools, with enough information to allow them to be uniquely identified, should be included in the Methods section. Authors are strongly encouraged to cite <a href="#">Research Resource Identifiers</a> (RRIDs) for antibodies, model organisms and tools, where possible.</p> <p>Have you included the information requested as detailed in our <a href="#">Minimum Standards Reporting Checklist</a>?</p> |                                                                                                                           |
| <b>Availability of data and materials</b>                                                                                                                                                                                                                                                                                                                                                                                                                                                                   | Yes                                                                                                                       |
| <p>All datasets and code on which the conclusions of the paper rely must be either included in your submission or deposited in <a href="#">publicly available repositories</a></p>                                                                                                                                                                                                                                                                                                                          |                                                                                                                           |

(where available and ethically appropriate), referencing such data using a unique identifier in the references and in the “Availability of Data and Materials” section of your manuscript.

Have you have met the above requirement as detailed in our [Minimum Standards Reporting Checklist?](#)

[Click here to view linked References](#)

1 **To assemble or not to resemble – A validated Comparative Metatranscriptomics Workflow**

2 **(CoMW)**

3

4 **Authors**

5 Muhammad Zohaib Anwar<sup>1\*</sup>

6 Anders Lanzen<sup>2,3</sup>

7 Toke Bang-Andreasen<sup>1,4</sup>

8 Carsten Suhr Jacobsen<sup>1\*</sup>

9

10 **Author Affiliations**

11 1 Department of Environmental Science, Aarhus University RISØ Campus, Frederiksborgvej 399,

12 4000 Roskilde, Denmark

13 2 AZTI, Herrera Kaia, Pasaia, Spain

14 3 IKERBASQUE, Basque Foundation for Science, 48011 Bilbao, Spain

15 4 Department of Biology, University of Copenhagen, Copenhagen, Denmark

16

17 **\*Corresponding Authors:**

18 Muhammad Zohaib Anwar: [mzanwar@envs.au.dk](mailto:mzanwar@envs.au.dk)

19 Carsten Suhr Jacobsen: [csj@envs.au.dk](mailto:csj@envs.au.dk)

## 20 **Abstract**

### 21 **Background**

22 Metatranscriptomics has been used widely for investigation and quantification of microbial  
23 communities' activity in response to external stimuli. By assessing the genes expressed,  
24 metatranscriptomics provide an understanding of the interactions between different major  
25 functional guilds and the environment. Here, we present *de-novo* assembly-based Comparative  
26 Metatranscriptomics Workflow (CoMW) implemented in a modular, reproducible structure,  
27 significantly improving the annotation and quantification of metatranscriptomes.  
28 Metatranscriptomics typically utilize short sequence reads, which can either be directly aligned  
29 to external reference databases ("assembly-free approach") or first assembled into contigs  
30 before alignment ("assembly-based approach"). We also compare CoMW (assembly-based  
31 implementation) with assembly-free alternative workflow, using simulated and real-world  
32 metatranscriptomes from Arctic and Temperate terrestrial environments. We evaluate their  
33 accuracy in precision and recall using generic and specialized hierarchical protein databases.

### 34 **Results**

35 CoMW provided significantly fewer false positives resulting in more precise identification and  
36 quantification of functional genes in metatranscriptomes. Using the comprehensive database  
37 M5nr, the assembly-based approach identified genes with only 0.6% false positives at  
38 thresholds ranging from inclusive to stringent compared to the assembly-free approach yielding  
39 up to 15% false positives. Using specialized databases (Carbohydrate Active-enzyme and  
40 Nitrogen Cycle), the assembly-based approach identified and quantified genes with 3-5x less  
41 false positives. We also evaluated the impact of both approaches on real-world datasets.

## 42 **Conclusions**

43 We present an open source *de-novo* assembly-based Comparative Metatranscriptomics  
44 Workflow (CoMW). Our benchmarking findings support the argument of assembling short reads  
45 into contigs before alignment to a reference database, since this provides higher precision and  
46 minimizes false positives.

## 47 **Key Words**

48 Metatranscriptomics, Benchmarking, Assembly, Alignment, Precision, Recall, False positives

## 49 **1 Introduction**

50 Metatranscriptomics provides an unprecedented insight to complex functional dynamics of  
51 microbial communities in various environments. The method has been applied to study the  
52 microbial activity in thawing permafrost and the related biogeochemical mechanisms  
53 contributing to greenhouse gas emissions [1], and Gonzalez *et al.* [2] applied  
54 metatranscriptomics to evaluate root microbiome response to soil contamination.  
55 Metatranscriptomics has also been used to study the functional human gut microbiota [3,4].  
56 The method is typically used to identify, quantify and compare the functional response of  
57 microbial communities in natural habitats or in relation to environmental or physio-chemical  
58 impacts.

59 Using high-throughput sequencing techniques such as Illumina, metatranscriptomics offers a  
60 non PCR biased method for looking at transcriptional activity occurring within a complex and  
61 diverse microbial population at a specific point in time [5]. However, curation and annotation of  
62 this complex data has emerged as a major challenge. To date, several studies have used various  
63 analytic workflows. Typically, short sequence reads are utilized, which can either be individually  
64 aligned directly to external reference databases (hereafter “assembly-free”) or assembled into  
65 longer contiguous fragments (contigs) for alignment (hereafter “assembly-based”). Various  
66 studies have used either of these two general approaches. For example, Poulsen *et al.* [6] used  
67 an assembly-based approach. An open-source pipeline, IMP [7] also uses this approach in

68 integrated metagenomic and metatranscriptomic analyses. The assembly-free Approach has  
69 instead been used by e.g. Jung *et al.* [8], aligning short reads to reference genomes of lactic acid  
70 bacterial strains associated with the kimchi microbial community. Similarly, an open source  
71 pipeline developed by Martinez *et al.* [9] to analyse metatranscriptomics data-sets also aligns  
72 short reads directly to a protein database before annotation. The choice of either of these two  
73 alternatives for metatranscriptomics analyses may depend on lack of thorough comparisons. Since  
74 no independent and direct comparison between them has been performed presently, various  
75 metatranscriptomics analysis approaches may at times produce inconsistent observations, even  
76 if identical databases are used in the analysis. Thus, standardization of computational analysis is  
77 necessary to enable further propagation of metatranscriptomics approaches and their  
78 integration into microbial ecology research. Benchmarking provides a critical view of the  
79 efficiency and precision of different workflows and use of simulated communities for  
80 benchmarking enables the analysis to be independent of experimental variation and biases  
81 [10].

82 Here, we present Comparative Metatranscriptomic Workflow (CoMW) implemented using the  
83 *de-novo* assembly-based approach, standardized and validated for functional annotation and  
84 quantitative expression analysis. We validated the suitability of CoMW for functional analysis by  
85 comparing it to a typical assembly-free approach using simulated datasets and evaluated the  
86 accuracy of both approaches using precision, recall and False Discovery Rates (FDR). Three  
87 different protein databases were selected for this benchmarking in order to include a  
88 representative selection of three different degrees of specialization, on a range from a more  
89 inclusive database with wide coverage (universality) and low degree of expert curation, to a



90 smaller, highly curated database, with more narrow coverage: 1) M5nr [11] :-- an inclusive and  
91 comprehensive non-redundant protein database in combination with eggNOG hierarchical  
92 annotation 2) Carbohydrate-Active Enzymes (CAZymes) [12] :-- a database dedicated to  
93 describing the families of structurally-related catalytic and carbohydrate-binding modules of  
94 enzymes and 3) Nitrogen Cycling Database (NCycDB) [13] :-- a specialized and manually curated  
95 database covering only N cycle genes. Finally, in order to estimate the consistency and variance  
96 in the results caused by the choice of approach we then applied them to real world  
97 metatranscriptomes from microbial communities in 1) active-layer permafrost soil from  
98 Svalbard [14] and 2) Ash impacted Danish Forest soil [15].

## 99 **2 Findings**

### 100 **2.1 Comparative Metatranscriptomics Workflow (CoMW)**

101 We have standardized, implemented, and validated a metatranscriptomic workflow (CoMW)  
102 using de-novo assembly-based approach that can assist in analysing large metatranscriptomics  
103 data. It makes each step of the metatranscriptomic workflow straightforward and help to make  
104 these complex analyses more reproducible and the components re-useable in different  
105 contexts. The core processes such as ORF detection and alignment against the functional  
106 database are vital in any metatranscriptomic analyses and are, therefore, present uniformly in  
107 all workflows. However, since most of the tools performing these core processes are ever  
108 improving, the workflow is implemented in modular format in order to have the possibility of  
109 using alternative tools and databases if preferred or use a newer version of these tools.  
110 Modularity additionally also provides choice where optional steps can be skipped, changed or

111 even improved in a structural manner for example the scripts are designed to cater contigs  
112 from more than one assembler. In addition to core process CoMW has a couple of optional  
113 steps such as abundance based and non-coding RNA filtering which can be different in data sets  
114 from a different environment. CoMW is open source workflow written in python available at  
115 (<https://github.com/anwarMZ/CoMW>) and published as a computational capsule on codeocean  
116 [16]. An Anaconda cloud environment is created with the provided configuration file to install  
117 third-party tools and dependencies. Help regarding input, output and parameters is provided  
118 with each script and a comprehensive tutorial is presented in the GitHub repository.

## 119 **2.2 Evaluation of CoMW (assembly-based Approach) and comparison to an assembly-free**

### 120 **method**

121 In order to compare the performance of the assembly-based workflow CoMW and assembly-  
122 free approaches, we simulated community transcript data using 4943 full length genes provided  
123 by Martinez *et al.* [9]. We analysed both approaches separately and compared against direct  
124 annotation of full-length genes. The full-length genes were annotated using all three databases  
125 (M5nr, CAZy and NCycDB) independently to classify them into functional subsystems and gene  
126 families. Figure 1 shows detailed workflow of comparative analysis using both approaches.

127

128 *Figure 1: Flowchart illustrating the evaluation and benchmarking scheme used for the comparison of alternative*  
129 *approaches. Red path indicates the full-length genes workflow, Green indicates the steps in the assembly-based*  
130 *workflow CoMW and Blue indicates the steps in the assembly-free approach.*

131

### 132 **2.2.1 Functional assignment**

133 **M5nr Alignment** Full length genes of the simulated community dataset were aligned and  
134 identified into 671 unique eggNOG orthologs, belonging to 19 distinct functional subsystems  
135 (level II). At the default confidence threshold (bit score 50), the, assembly-free approach  
136 produced alignments to 820 orthologs with a precision of 85% (14.9% FPs), whereas CoMW  
137 identified 665 orthologs with a precision of 99.3% (0.6% FPs) at the default confidence threshold  
138 of 1E-5. Repeating the alignments using a gradient of 15 varying confidence thresholds for each  
139 approach (Low -  $T_L$ , Medium -  $T_M$  and High –  $T_H$ ; five thresholds / category) resulted in dissimilar  
140 performance for both approaches. The precision and recall of CoMW did not decrease below  
141 99.3% and 98.5% respectively throughout all categories whereas the assembly-free approach  
142 had a maximum precision of 96.3% at  $T_M$  and decreases to 85% at  $T_L$  and  $T_H$ . CoMW also  
143 produced fewer (only 0.6%) FPs consistently compared to the assembly-free Approach of FPs  
144 ranging from 14.9% to minimum 3.6% at highest precision. Based on F-Score the most optimal  
145 alignment for each approach is given in Table 1, whereas detailed values for precision, recall, F-  
146 Score and FDR are listed in Supplementary Table S1. We then also evaluated both approaches  
147 by selectively removing sequences belonging to a certain functional subsystem from the M5nr  
148 database in a controlled manner (segmented cross validation) in order to replicate real world  
149 metatranscriptomes where a certain functional subsystem can be completely or partially absent  
150 from the reference database. We removed four (level II) subsystems (“[D] Cell cycle control, cell  
151 division, chromosome partitioning”; “[L] Replication, recombination and repair”; “[E] Amino  
152 acid transport and metabolism” and “[R] General function prediction only” and “[S] Function

153 unknown"). The level II subsystems were randomly removed (see data availability for the script  
154 used for the removal) one at a time realigning full-length genes and simulated reads using both  
155 CoMW and assembly-free approaches to the cropped database to compare identification  
156 consistency. In each validation round, both precision and recall of CoMW were significantly  
157 higher than assembly-free approach. Recalling ability of assembly-free approach dropped  
158 significantly in this validation as compared to full database comparison. CoMW also produced  
159 less FPs as compared to assembly-free approach. Table 2 provides details for each validation  
160 cycle.

161 **CAZY Alignment** From 2395 full length genes, 500 sequences were aligned to 395 unique  
162 functional genes in the CAZY database, which belonged to 130 gene families and were further  
163 classified as seven enzyme classes. Using default confidence thresholds (BTS 50, 1E-5), the  
164 assembly-free approach identified 765 functional genes belonging to 112 unique families and  
165 six enzyme classes with a precision of 28.5% (71.4% FPs). CoMW identified 488 functional  
166 genes from CAZY database that were classified into 147 gene families from seven enzyme  
167 classes with a precision of 66% (FDR 33.9%) at the default confidence threshold. However,  
168 when we repeated the process with 15 various confidence thresholds, precision improved  
169 consistently and FPs decreased, whereas for the assembly-free approach, precision dropped  
170 significantly with increasing confidence threshold (see Table 1 and Supplementary Table S2).

171 **NCycDB Alignment** 410 out of 2395 full-length genes were aligned to this database, identified  
172 as 29 unique Nitrogen cycle genes and further belonging to 15 functional gene families in five  
173 pathways. Using default confidence thresholds, the assembly-free approach identified 1541  
174 functional genes belonging to 25 functional gene families classified into six pathways with a

175 precision of 0.9% (99% FPs). CoMW identified 42 Nitrogen cycle genes classified into 25 gene  
 176 families from six pathways with a precision of 59.5% (40.4% FPs) at a default confidence  
 177 threshold of 1E-5. Like comparisons against M5nr and CAZY we repeated the process with 15  
 178 different confidence thresholds for each approach. Precision improved significantly for CoMW  
 179 at stringent thresholds whereas for the assembly-free approach, the best precision achieved  
 180 was 5.8%. (Table 1, Supplementary Table S3).

181

182 *Table 1 Comparison of Precision, Recall, F Score and FDR for the assembly-free and the CoMW (assembly-based) approaches*  
 183 *using all three databases based on best F-Score (Full table for both approaches and databases can be seen in Table S1, S2 and*  
 184 *S3). Bold emphasizes better precision, recall, F-Score and FDR in each database between both approaches*

| Databases | Approach      | Threshold       | Threshold Category | Recall        | Precision     | F-Score       | FDR (%)        |
|-----------|---------------|-----------------|--------------------|---------------|---------------|---------------|----------------|
| eggNOG    | assembly-free | <i>BTS 120</i>  | <i>Strict [TH]</i> | <b>0.9880</b> | 0.9540        | 0.9707        | 4.5977         |
|           | CoMW          | <i>1.00E-15</i> | <i>Strict [TH]</i> | 0.9851        | <b>0.9939</b> | <b>0.9895</b> | <b>0.6006</b>  |
| CAZy      | assembly-free | <i>BTS 110</i>  | <i>Strict [TH]</i> | 0.3510        | 0.5325        | 0.4231        | 46.7433        |
|           | CoMW          | <i>1.00E-08</i> | <i>Medium [TM]</i> | <b>0.8131</b> | <b>0.7759</b> | <b>0.7940</b> | <b>22.4096</b> |
| NCycDB    | assembly-free | <i>BTS150</i>   | <i>Strict [TH]</i> | 0.1666        | 0.0581        | 0.0862        | 94.1860        |
|           | CoMW          | <i>1.00E-14</i> | <i>Strict [TH]</i> | <b>0.6666</b> | <b>0.8333</b> | <b>0.7407</b> | <b>16.6666</b> |

185

186 *Table 2 Comparison of Precision, Recall, F Score and FDR for the assembly-free and CoMW (assembly-based) approaches using*  
 187 *the selective removal of functional subsystems from eggNOG database (segmented cross-validation) to evaluate the consistency*  
 188 *of both approaches. Bold emphasizes better consistency compared to Full length genes*

| Removed Subsystem                          | Approach      | Recall        | Precision     | F-Score       | FDR (%)       |
|--------------------------------------------|---------------|---------------|---------------|---------------|---------------|
| Cell wall/membrane/envelope biogenesis [M] | assembly-free | 0.8726        | 0.9580        | 0.9133        | 4.1958        |
|                                            | CoMW          | <b>0.9792</b> | <b>0.9855</b> | <b>0.9824</b> | <b>1.4423</b> |
| Replication, recombination and repair [L]  | assembly-free | 0.8734        | 0.9588        | 0.9141        | 4.1166        |
|                                            | CoMW          | <b>0.9796</b> | <b>0.9858</b> | <b>0.9827</b> | <b>1.415</b>  |
| Amino acid transport and metabolism [E]    | assembly-free | 0.8750        | 0.9589        | 0.9150        | 4.1095        |

|                                                                   |               |               |                |               |               |
|-------------------------------------------------------------------|---------------|---------------|----------------|---------------|---------------|
|                                                                   | CoMW          | <b>0.9812</b> | <b>0.9874</b>  | <b>0.9843</b> | <b>1.2578</b> |
| General function prediction only and<br>Function unknown [R], [S] | assembly-free | 0.8933        | 0.9281         | 0.9104        | 7.1856        |
|                                                                   | CoMW          | <b>0.9884</b> | <b>0.97443</b> | <b>0.9814</b> | <b>2.5568</b> |

189

### 190 **2.2.2 Expression Quantification**

191 We also compared the ability of both approaches to quantify the expression of identified  
192 transcripts by performing differential expression analysis of two groups in simulated  
193 communities and compared against the full-length gene expression simulated. We selected  
194 three best identification thresholds for both approaches based on highest F-Score and  
195 performed differential expression analysis. This analysis for both approaches was carried out  
196 against all three databases using the most specific level of hierarchy in the respective databases  
197 in order to capture their ability to quantify expression levels of specific genes.

198 According to full-length gene alignments against eggNOG, 123 genes were significantly  
199 upregulated and 270 were significantly downregulated. According to the assembly-free  
200 Approach (with the best resulting F-Score), 73 genes were up-regulated (precision 94.5%, 5.4%  
201 FPs) and 380 (precision 65.7%, 34.2% FPs) were down regulated. whereas using the assembly-  
202 based Approach CoMW, 99 genes were identified as up-regulated (precision 94.9%, 5% FPs) and  
203 249 down-regulated (precision 97.1%, 2.8% FPs). For the CAZy database full-length genes, 81  
204 and 189 genes were identified as significantly up- and down regulated, respectively. Using the  
205 assembly-free approach 31 up-regulated (precision 19.3%, 80.6% FPs) and 137 down-regulated  
206 genes (precision 52.5%, 47.4% FPs) were identified, whereas the CoMW identified 83  
207 (precision 71%, 28.9% FPs) and 191 (precision 73.8%, 26.1% FPs), respectively- In the NCyc  
208 database expression analysis, three and 14 genes were seen as significantly up and down-

209 regulated respectively using full-length genes. According to the assembly-free approach, 26  
210 (precision 0%, 100% FPs) and 107 (precision 4.6%, 95.3% FPs) genes were up and down  
211 regulated respectively, whereas according to CoMW, three (precision 33.3%, 66.6% FPs) genes  
212 were up-regulated and 18 (precision 55.5%, 44% FPs) were down-regulated. Precision, Recall  
213 and FDR for both approaches against all three databases are available in Supplementary Table  
214 S4. Additionally, we collapsed the functional genes into functional subsystems and gene  
215 families to remove FPs produced due to identification of homologous proteins or proteins with  
216 multiple inheritance. Fold change (log<sub>2</sub> transformed) was then calculated for each  
217 subsystem/gene family. (see Figure 2)

218

219 *Figure 2: Differential Expression comparison of the assembly-free and the CoMW assembly-based approaches using*  
220 *A) M5nr database, B) NCycDB and C) CAZy database.*

221

### 222 **2.2.3 Real-World metatranscriptomes**

223 To evaluate the effect of the two approaches on real world data, two metatranscriptomes from  
224 microbial communities were studied. In the first study we investigated the transcriptional  
225 response during warming from -10 °C to 2 °C and subsequent cooling of 2 °C to -10 °C of an  
226 Arctic tundra active layer soil from Svalbard, Norway . The aim of the study was to understand  
227 taxonomic and functional shifts in microbial communities caused by climate change in the  
228 Arctic. A pronounced shift during the incubation period was noticed by Schostag *et al.* [14]  
229 which was not replicated by the assembly-free approach. However, using CoMW, we identified  
230 an increase of genes in the subsystem “[P] Inorganic ion transport and metabolism”. During  
231 cooling, CoMW also captured the upregulation and downregulation of genes related to “[J]

232 Translation, ribosomal structure and biogenesis” and “[C] Energy production and conversion”  
233 respectively (Figure 3) unlike the assembly-free approach. These findings may have implications  
234 for our understanding of carbon dioxide emission, Nitrogen cycling and plant nutrient  
235 availability in Arctic soils.

236

237 *Figure 3: Relative abundance of eggNOG functional subsystems in Arctic permafrost soil identified and quantified*  
238 *using both CoMW and the assembly-free approach compares the differences in observed functional dynamics. Blue*  
239 *dotted line represents trends using CoMW (assembly-based) whereas Red Solid line represents assembly-free*  
240 *approach*

241

242 In the second study, we investigated the effects of wood ash amendment on Danish forest soils [15].  
243 Ash was added in three different quantities (0/control, 3, 12 and 90 tonnes ash per hectare (t  
244 ha<sup>-1</sup>)) and the effect over time was analysed in soil communities at 0, 3, 30 and 100 days after  
245 ash addition. This resulted in strong effects on functional expression as seen in Figure 4. Both  
246 approaches once again displayed varying results such as changes in genes related to eggNOG  
247 functional subsystem “[W] Extracellular structures”. assembly-free approach also identified  
248 75% of genes as “[S] Function unknown” consistently unlike assembly-based.

249

250 *Figure 4: Relative abundance of eggNOG functional subsystems in Ash deposited Danish forest soil with time*  
251 *identified using both the CoMW and an assembly-free approach. Blue dotted line represents trends using CoMW*  
252 *(assembly-based) whereas Red Solid line represents assembly-free approach*

253

### 254 **3 Discussion**

255 The application of metatranscriptomics is less common than other DNA-based genomics  
256 techniques and thus most analysis pipelines are built *ad hoc* [17]. An assembly-free approach is



257 used in a few pipelines/workflows such as COMAN [18], Metatrans [9], and SAMSA2 [19] , while  
258 an assembly-based approach is used in a few such as IMP [7]. The lack of thorough  
259 benchmarking studies and standardized workflows in metatranscriptomics has made it a more  
260 challenging task to analyse the typically big datasets produced. Previous studies e.g. Zhao *et al.*  
261 & Celaj *et al.* [20,21] have compared *de-novo* sequence assemblers including Trinity  
262 [22], MetaVelvet [23], Oases [24], AbySS [25] and SOAPden-ovo [26]. Similarly, for assembly-  
263 free approach direct short read mappers have been compared thoroughly such as DIAMOND  
264 [27], BLASTX [28] and RAPSearch2 [29] but an independent comparison of the two different  
265 approaches based on including assembly or directly aligning reads (here “assembly-free”) has  
266 been lacking. Critical Assessment of Metagenomic Interpreter (CAMI) [30] is so far the most  
267 comprehensive benchmarking effort, however it lacks any similar metatranscriptomics  
268 benchmarking. IMP [7] uses an integrated approach of metagenomics and metatranscriptomics  
269 and has some overlapping areas to CoMW and can be used together due to modular approach  
270 of CoMW.

271 Using simulated samples comprised of genes collected from abundant genomes provided by  
272 Martinez *et al.*, we show that both approaches provide similarly high recall rates against the  
273 general comprehensive database M5nr. However, CoMW provided a significantly better  
274 precision and a lower false discovery rate for identification and quantification. For relatively  
275 compact and specialized databases, recall and precision drop for both approaches (especially  
276 for the most compact database NCyc). Whereas, CoMW still appeared to be more precise,  
277 meaning that fewer genes were mis-assigned against these database and significantly lower FPs  
278 were produced.

279 We have attempted to assist this decision-making for processing metatranscriptomic analysis  
280 by independently assessing the performance of the two most common approaches and provide  
281 a road map for functional annotation and expression quantification against databases ranging  
282 from inclusive to specialized. The significantly higher precision in identification and  
283 quantification for gene families and functional subsystems in simulated samples, against all  
284 three databases, confirmed that while an assembly step is challenging computationally, it holds  
285 the potential to reveal information regarding the gene expressions that is not attainable  
286 without it. Selecting a single best workflow or pipeline for all types of metatranscriptomics  
287 studies is not a straightforward affair, and we believe that choice of approach changes the  
288 outcome of study significantly as observed with real-world datasets from active-layer  
289 permafrost soil from Svalbard and Ash impacted Danish Forest soil. In addition to choosing the  
290 right workflow, combining that with the appropriate reference database is equally important to  
291 ensure the best annotation performance. With databases specialized for one or more specific  
292 environments or functional categories, the assembly-free Approach under-performs due to its  
293 inability to identify alignments to homologs in the reference database. We also show that the  
294 assembly-free Approach can increase the FDR in annotation when a database is dominant in  
295 specific functional subsystem, which can also lead to wrong estimation of fold change in  
296 expression

297 While taxonomic annotation is beyond the scope of CoMW and thus our benchmarking  
298 analyses, it is important to consider the limited value of most functional genes for and thus  
299 functional metatranscriptomics alone for structural profiling of environmental communities,  
300 due to the high rate of horizontal gene transfer (HGT) [31]. Approaches for this purpose include

301 the identification of a limited set of “phylogenetic marker genes” (eg.[32]) or “total RNA”  
302 metatranscriptomics whereby the rRNA content is retained and utilized for taxonomic analysis  
303 [33]. Though not shown here, we expect that the former approach would also benefit in  
304 accuracy from assembling mRNA to full length transcripts before classification, based on our  
305 results regarding functional diversity. The total RNA approach also benefits from custom rRNA  
306 targeted assembly [15], which may be incorporated into CoMW thanks to its modularity.

307 In summary, we present the assembly-based workflow CoMW and show that this approach  
308 results in consistently better accuracy for functional analysis of metatranscriptomics data. Our  
309 benchmarking results show that the choice of approach (assembly-free v assembly-based) and  
310 database significantly affects the quality of the identification, annotation and expression  
311 results. Given the impact of each of these variables, it is inevitable that it significantly affects  
312 the results of an individual study and comparison of across studies. We believe that the work  
313 presented here will both provide a useful tool for and assist the microbial ecology research  
314 community to make more informed decisions about the most appropriate methodological  
315 approach to analyze large metatranscriptomic datasets with improved precision.

316

## 317 **4 Methods**

### 318 ***4.1 CoMW Implementation***

319 CoMW (assembly-based) is based on four major steps: 1) *De-novo* Assembly and Mapping; 2)  
320 Filtering; 3) Gene Prediction and Alignment 4) Annotation.

321 *De-novo Assembly and Mapping* of short reads back to assembled contigs is done using Trinity  
322 [22] and BWA [34] respectively. Various tools have been developed for de-novo

323 metatranscriptome reconstruction that usually rely on graph-theory. Trinity however generates  
324 the most optimal assemblies for coding RNA reads [17,21,35]. Nevertheless, in CoMW, user can  
325 assemble short reads into contigs by any assembler preferred but it can reduce the quality of  
326 the following steps such as alignment of contigs.

327 *Filtering of Contigs* is done to remove variance in sequences/samples. Since CoMW is assembly-  
328 based, after we assemble the reads into longer contigs we also propose a 2-step filtering of the  
329 contigs to remove any chimeric or false contig made as a result of assembly or sequencing error  
330 by removing contigs that have an expression level less than a specific threshold and to remove  
331 any potential non-coding RNA contigs assembled. We can filter contig abundance data by  
332 removing all contigs with relative expression lower than a specific cut-off, e.g. 1% (selected  
333 based on dataset variance) of the number of sequences in the dataset with least number of  
334 sequences. This threshold is also flexible for different datasets and in some cases not required  
335 at all so CoMW allows user to bypass this step or change the threshold up and down based on  
336 data variation. The filtered contigs are subject to potential non-coding RNA filtration by aligning  
337 them against the RFam database [36] using infernal [37] which is a secondary-structure-aware  
338 aligner that predicts the secondary structure of RNA sequences and similarities based on the  
339 consensus structure models. Once again, the ncRNA filtering is an optional step in CoMW,  
340 though highly recommended in order to reduce FPs.

341 *Gene Prediction and Alignment* is done using Transeq from EMBOSS [38] to predict probable  
342 open reading frames (ORFs) of the contigs (customizable, by default six per contig). We used  
343 SWORD [39] as alignment tool against reference databases. SWORD can be used in parallel  
344 based on computational resources available and the aligned results are parsed and cut-off at a

345 specific confidence threshold of combination of e-value and alignment length (usually 1e-5, can  
346 be changed given the assembly distribution in datasets).

347 *Annotation* of aligned transcripts from the previous step can be done using the databases such  
348 as eggNOG which is a hierarchically structured annotation using a graph-based unsupervised  
349 clustering available algorithm to produce genome wide orthology inferences. Aligned proteins  
350 are then placed into functional subsystems based on their best hits.), CAZy which is a  
351 knowledge-based resource specialized in the Glycogenomics, and NCycDB; a Nitrogen cycle  
352 database. This results in a count table with a contig and eggNOG ortholog or CAZy gene or NCyc  
353 gene having a certain count from each sample depending upon database used. This count table  
354 can be then used for differential expression using state-of-the-art expression analysis suit such  
355 as DESeq2 [40] or its wrapper SARTools [41]. For evaluation of CoMW we used the template  
356 script provided by the SARTools for DeSeq2 analysis where we specified first group of samples  
357 as the reference samples and second group as condition with a parametric mean-variance and  
358 Benjamini & Hochberg method for P adjustment [42].

#### 359 **4.2 Assembly-free Workflow**

360 For the assembly-free approach we used the Metatrans pipeline [9], which uses FragGeneScan  
361 [43] for ORF predictions in short reads, CD-Hit [44] for gene clustering and Diamond [27] for  
362 alignment against the M5nr, CAZy and NCyc [11–13] database. We then used the same  
363 annotation script which is included in CoMW. For expression analysis gene counts were  
364 normalized between samples using the DESeq2 [40] algorithm. Significantly differentially  
365 expressed genes were analysed in SARTools [41] using parametric relationship and p-value 0.05  
366 as significance threshold. The Benjamini and Hochberg correction procedure [42] was used to

367 adjust p-value. For parameters and versions of tools used in Metatrans see supplementary  
368 GitHub repository in data availability

### 369 **4.3 Composition of Simulated Communities**

370 In this study we utilised a set of simulated communities from Martinez *et al.* [9] where they  
371 collected 4943 genes (coding regions) from five abundant microbial genomes: *Bacteroides*  
372 *vulgatus* ATCC 8482, *Ruminococcus torques* L2-14, *Faecalibacterium prausnitzii* SL3/3,  
373 *Bacteroides thetaiotaomicron* VPI-5482 and *Parabacteroides distasonis* ATCC 8503. We  
374 simulated short reads into 100 samples using Polyester [45] embedded in a script provided by  
375 Martinez *et al.* [9] at coverage of 20x which resulted in a count table and short reads with 2395  
376 genes to add the impact of sequencing coverage that the simulator mimics. The process of  
377 regulation of abundance was done by first dividing the 100 samples into two groups (“A” and  
378 “B”) and then abundance of randomly selected 10% genes was regulated up- and down up to 4-  
379 folds, in addition to this we also knocked out (0 abundance) 5% genes completely from both  
380 simulated reads and count tables. The process of selection of samples and genes was random  
381 but tracked. To include quality and coverage bias, we used the ART simulator [46] that mimics  
382 the coverage bias and thus some genes were removed to produce an equal number of reads in  
383 FASTQ format to those produced by Polyester. ART was initially trained with Hi-Seq 2500  
384 Illumina quality error model from dataset discussed above to have a consistent error bias. After  
385 simulating FASTQ files we then extracted the quality data and bound it to the FASTA files  
386 generating new FASTQ files. With the coverage bias and quality training included we had a total  
387 of 62,035,912 reads ( $310,179 \pm 3,454$  reads/sample).

#### 388 4.4 Evaluation Measures

389 We used the standard measures of precision (also named positive predictive value, PPV),  
390 accounting for how many annotations and identifications of significantly differentially  
391 expressed gene families and subsystems are correct and defined as  $\frac{TP}{TP+FP}$  and recall (also  
392 named sensitivity or true positive rate, TPR), accounting for how many correct annotations are  
393 selected, defined as  $\frac{TP}{TP+FN}$  where TP indicates the number of orthologs that have been correctly  
394 annotated, FN indicates the number of orthologs/genes/functional subsystem which are in the  
395 simulated communities but were not found by a certain approach and FP indicates the number  
396 of orthologs/genes/functional subsystem that have been wrongly annotated (because they do  
397 not appear in the simulated communities). The F-score is the harmonic mean of precision and  
398 recall, defined as  $\frac{2*Precision*Recall}{Precision+Recall}$ .

### 399 **Availability of source code and requirements**

- 400 • Project name: Comparative Metatranscriptomics Workflow (*CoMW*)
- 401 • Project home page: <https://github.com/anwarMZ/CoMW>
- 402 • Operating system(s): Platform independent
- 403 • Programming language: Python, R, and bash
- 404 • Other requirements: Requirements mentioned in detailed manual at GitHub
- 405 • License: GNU General Public License v3.0

### 406 **Availability of supporting data and materials**

- 407 • An archival copy of the code and supporting data are available via the GigaScience  
408 database, GigaDB [47]
- 409 • Raw sequence data generated using simulation of full-length genes were deposited in  
410 the NCBI Sequence Read Archive and are accessible through BioProject accession  
411 number PRJNA509064
- 412 • Project supplementary scripts: [https://github.com/anwarMZ/CoMW\\_supp](https://github.com/anwarMZ/CoMW_supp)
- 413 • Supplementary File 1 – Precision Recall Analysis of both approaches
- 414 • Supplementary File 2 – Differential Expression Analysis of all approaches using eggNOG  
415 database
- 416 • Supplementary File 3 – Differential Expression Analysis of all approaches using CAZy  
417 database
- 418 • Supplementary File 4 – Differential Expression Analysis of all approaches using NCyc  
419 database

### 420 **Tracking and Reproducibility**



- 421 • CoMW is published as computational capsule on codeocean [16] and can be accessed  
422 through <https://doi.org/10.24433/CO.1793842.v1>  
423 • CoMW is registered at SciCrunch.org with RRID – SCR\_017109.

424 ***List of abbreviations***

425 FDR: False Discovery Rate, FP: False Positives, TP: True Positives, FN: False Negatives, mRNA:  
426 messenger RNA

427 ***Ethical Approval***

428 Not applicable

429 ***Consent for publication***

430 Not applicable

431 ***Competing Interests***

432 The authors declare that they have no competing interests.

433 ***Funding***

434 This work was supported by a grant from the European Commission’s Marie Skłodowska Curie  
435 Actions program under project number 675546 (*MicroArctic*).

436 ***Author's Contributions***

437 MZA & CSJ conceived and designed the study. MZA, TBA and AL carried out the data  
438 production. MZA and AL carried out analysis. MZA drafted the manuscript and AL, TBA and CSJ  
439 revised and approved the final version.

440 ***Acknowledgements***

441 Authors would like to acknowledge European Commission’s MicroArctic project for the funding.  
442 We would also like to thank authors of Metatrans for providing the data used for simulation.

443 Additionally, we would like to thank Robert Vaser author of Sword to make it available on  
444 anaconda cloud and helping in integration with CoMW.

## 445 **References**

- 446 1. Coolen MJL, Orsi WD. The transcriptional response of microbial communities in thawing Alaskan  
447 permafrost soils. *Front Microbiol.* 2015;6.
- 448 2. Gonzalez E, Pitre FE, Pagé AP, Marleau J, Guidi Nissim W, St-Arnaud M, et al. Trees, fungi and bacteria:  
449 tripartite metatranscriptomics of a root microbiome responding to soil contamination. *Microbiome.*  
450 2018;6:53.
- 451 3. Gosalbes MJ, Durbán A, Pignatelli M, Abellan JJ, Jiménez-Hernández N, Pérez-Cobas AE, et al.  
452 Metatranscriptomic Approach to Analyze the Functional Human Gut Microbiota. *PLOS ONE.*  
453 2011;6:e17447.
- 454 4. Abu-Ali GS, Mehta RS, Lloyd-Price J, Mallick H, Branck T, Ivey KL, et al. Metatranscriptome of human  
455 faecal microbial communities in a cohort of adult men. *Nat Microbiol.* 2018;3:356.
- 456 5. Leimena MM, Ramiro-Garcia J, Davids M, van den Bogert B, Smidt H, Smid EJ, et al. A comprehensive  
457 metatranscriptome analysis pipeline and its validation using human small intestine microbiota datasets.  
458 *BMC Genomics.* 2013;14:530.
- 459 6. Poulsen M, Schwab C, Jensen BB, Engberg RM, Spang A, Canibe N, et al. Methylo-trophic  
460 methanogenic Thermoplasmata implicated in reduced methane emissions from bovine rumen. *Nat*  
461 *Commun.* 2013;4:1428.
- 462 7. Narayanasamy S, Jarosz Y, Muller EEL, Heintz-Buschart A, Herold M, Kaysen A, et al. IMP: a pipeline  
463 for reproducible reference-independent integrated metagenomic and metatranscriptomic analyses.  
464 *Genome Biol.* 2016;17:260.
- 465 8. Jung JY, Lee SH, Jin HM, Hahn Y, Madsen EL, Jeon CO. Metatranscriptomic analysis of lactic acid  
466 bacterial gene expression during kimchi fermentation. *Int J Food Microbiol.* 2013;163:171–9.
- 467 9. Martinez X, Pozuelo M, Pascal V, Campos D, Gut I, Gut M, et al. MetaTrans: an open-source pipeline  
468 for metatranscriptomics. *Sci Rep.* 2016;6:26447.
- 469 10. Almeida A, Mitchell AL, Tarkowska A, Finn RD. Benchmarking taxonomic assignments based on 16S  
470 rRNA gene profiling of the microbiota from commonly sampled environments. *GigaScience.* 2018;7.
- 471 11. Wilke A, Harrison T, Wilkening J, Field D, Glass EM, Kyrpides N, et al. The M5nr: a novel non-  
472 redundant database containing protein sequences and annotations from multiple sources and  
473 associated tools. *BMC Bioinformatics.* 2012;13:141.
- 474 12. Cantarel BL, Coutinho PM, Rancurel C, Bernard T, Lombard V, Henrissat B. The Carbohydrate-Active  
475 EnZymes database (CAZy): an expert resource for Glycogenomics. *Nucleic Acids Res.* 2009;37:D233-238.
- 476 13. Tu Q, Lin L, Cheng L, Deng Y, He Z. NCycDB: a curated integrative database for fast and accurate  
477 metagenomic profiling of nitrogen cycling genes. *Bioinforma Oxf Engl.* 2018;
- 478 14. Schostag MD, Anwar MZ, Jacobsen CS, Larose C, Vogel TM, Maccario L, et al. Transcriptomic  
479 responses to warming and cooling of an Arctic tundra soil microbiome. *bioRxiv.* 2019;599233.

- 480 15. Bang-Andreasen T, Anwar MZ, Lanzen A, Kjølner R, Rønn R, Ekelund F, et al. Total RNA-sequencing  
481 reveals multi-level microbial community changes and functional responses to wood ash application in  
482 agricultural and forest soil. *bioRxiv*. 2019;621557.
- 483 16. Anwar MZ, Lanzen A, Bang-Andreasen T, Jacobsen CS. Comparative Metatranscriptomic Workflow  
484 (CoMW) [Source Code]. *code ocean* 2019. <https://doi.org/10.24433/CO.1793842.v1>
- 485 17. Aguiar-Pulido V, Huang W, Suarez-Ulloa V, Cickovski T, Mathee K, Narasimhan G. Metagenomics,  
486 Metatranscriptomics, and Metabolomics Approaches for Microbiome Analysis: Supplementary Issue:  
487 Bioinformatics Methods and Applications for Big Metagenomics Data. *Evol Bioinforma*.  
488 2016;12s1:EBO.S36436.
- 489 18. Ni Y, Li J, Panagiotou G. COMAN: a web server for comprehensive metatranscriptomics analysis. *BMC*  
490 *Genomics*. 2016;17:622.
- 491 19. Westreich ST, Treiber ML, Mills DA, Korf I, Lemay DG. SAMSA2: a standalone metatranscriptome  
492 analysis pipeline. *BMC Bioinformatics*. 2018;19:175.
- 493 20. Zhao Q-Y, Wang Y, Kong Y-M, Luo D, Li X, Hao P. Optimizing de novo transcriptome assembly from  
494 short-read RNA-Seq data: a comparative study. *BMC Bioinformatics*. 2011;12:S2.
- 495 21. Celaj A, Markle J, Danska J, Parkinson J. Comparison of assembly algorithms for improving rate of  
496 metatranscriptomic functional annotation. *Microbiome*. 2014;2:39.
- 497 22. Grabherr MG, Haas BJ, Yassour M, Levin JZ, Thompson DA, Amit I, et al. Trinity: reconstructing a full-  
498 length transcriptome without a genome from RNA-Seq data. *Nat Biotechnol*. 2011;29:644–52.
- 499 23. Namiki T, Hachiya T, Tanaka H, Sakakibara Y. MetaVelvet: an extension of Velvet assembler to de  
500 novo metagenome assembly from short sequence reads. *Nucleic Acids Res*. 2012;40:e155.
- 501 24. Schulz MH, Zerbino DR, Vingron M, Birney E. Oases: robust de novo RNA-seq assembly across the  
502 dynamic range of expression levels. *Bioinformatics*. 2012;28:1086–92.
- 503 25. Simpson JT, Wong K, Jackman SD, Schein JE, Jones SJM, Birol I. ABySS: A parallel assembler for short  
504 read sequence data. *Genome Res*. 2009;19:1117–23.
- 505 26. Luo R, Liu B, Xie Y, Li Z, Huang W, Yuan J, et al. SOAPdenovo2: an empirically improved memory-  
506 efficient short-read de novo assembler. *GigaScience*. 2012;1:18.
- 507 27. Buchfink B, Xie C, Huson DH. Fast and sensitive protein alignment using DIAMOND. *Nat Methods*.  
508 2015;12:59–60.
- 509 28. Altschul SF, Gish W, Miller W, Myers EW, Lipman DJ. Basic local alignment search tool. *J Mol Biol*.  
510 1990;215:403–10.
- 511 29. Zhao Y, Tang H, Ye Y. RAPSearch2: a fast and memory-efficient protein similarity search tool for next-  
512 generation sequencing data. *Bioinformatics*. 2012;28:125–6.

- 513 30. Sczyrba A, Hofmann P, Belmann P, Koslicki D, Janssen S, Dröge J, et al. Critical Assessment of  
514 Metagenome Interpretation – a benchmark of computational metagenomics software. *Nat Methods*.  
515 2017;14:1063–71.
- 516 31. Simonson AB, Servin JA, Skophammer RG, Herbold CW, Rivera MC, Lake JA. Decoding the genomic  
517 tree of life. *Proc Natl Acad Sci U S A*. 2005;102:6608–13.
- 518 32. Segata N, Izard J, Waldron L, Gevers D, Miropolsky L, Garrett WS, et al. Metagenomic biomarker  
519 discovery and explanation. *Genome Biol*. 2011;12:R60.
- 520 33. Urich T, Lanzén A, Qi J, Huson DH, Schleper C, Schuster SC. Simultaneous Assessment of Soil  
521 Microbial Community Structure and Function through Analysis of the Meta-Transcriptome. *PLoS ONE*.  
522 2008;3.
- 523 34. Li H, Durbin R. Fast and accurate short read alignment with Burrows–Wheeler transform.  
524 *Bioinformatics*. 2009;25:1754–60.
- 525 35. Lau MCY, Harris RL, Oh Y, Yi MJ, Behmard A, Onstott TC. Taxonomic and Functional Compositions  
526 Impacted by the Quality of Metatranscriptomic Assemblies. *Front Microbiol*. 2018;9.
- 527 36. Griffiths-Jones S, Bateman A, Marshall M, Khanna A, Eddy SR. Rfam: an RNA family database. *Nucleic  
528 Acids Res*. 2003;31:439–41.
- 529 37. Nawrocki EP, Eddy SR. Infernal 1.1: 100-fold faster RNA homology searches. *Bioinformatics*.  
530 2013;29:2933–5.
- 531 38. Rice P, Longden I, Bleasby A. EMBOSS: The European Molecular Biology Open Software Suite. *Trends  
532 Genet*. 2000;16:276–7.
- 533 39. Vaser R, Pavlović D, Šikić M. SWORD—a highly efficient protein database search. *Bioinformatics*.  
534 2016;32:i680–4.
- 535 40. Love MI, Huber W, Anders S. Moderated estimation of fold change and dispersion for RNA-seq data  
536 with DESeq2. *Genome Biol*. 2014;15.
- 537 41. Varet H, Brillet-Guéguen L, Coppée J-Y, Dillies M-A. SARTools: A DESeq2- and EdgeR-Based R Pipeline  
538 for Comprehensive Differential Analysis of RNA-Seq Data. *PLOS ONE*. 2016;11:e0157022.
- 539 42. Benjamini Y, Hochberg Y. Controlling the False Discovery Rate: A Practical and Powerful Approach to  
540 Multiple Testing. *J R Stat Soc Ser B Methodol*. 1995;57:289–300.
- 541 43. Rho M, Tang H, Ye Y. FragGeneScan: predicting genes in short and error-prone reads. *Nucleic Acids  
542 Res*. 2010;38:e191.
- 543 44. Li W, Godzik A. Cd-hit: a fast program for clustering and comparing large sets of protein or  
544 nucleotide sequences. *Bioinforma Oxf Engl*. 2006;22:1658–9.
- 545 45. Frazee AC, Jaffe AE, Langmead B, Leek JT. Polyester: simulating RNA-seq datasets with differential  
546 transcript expression. *Bioinformatics*. 2015;31:2778–84.

547 46. Huang W, Li L, Myers JR, Marth GT. ART: a next-generation sequencing read simulator.  
548 *Bioinformatics*. 2012;28:593–4.

549 47. Anwar MZ, Lanzén A, Bang-Andreasen T, Jacobsen CS. Supporting data for “To assemble or not to  
550 resemble – A validated Comparative Metatranscriptomics Workflow (CoMW)”. *GigaScience Database*  
551 2019. <http://dx.doi.org/10.5524/100630>

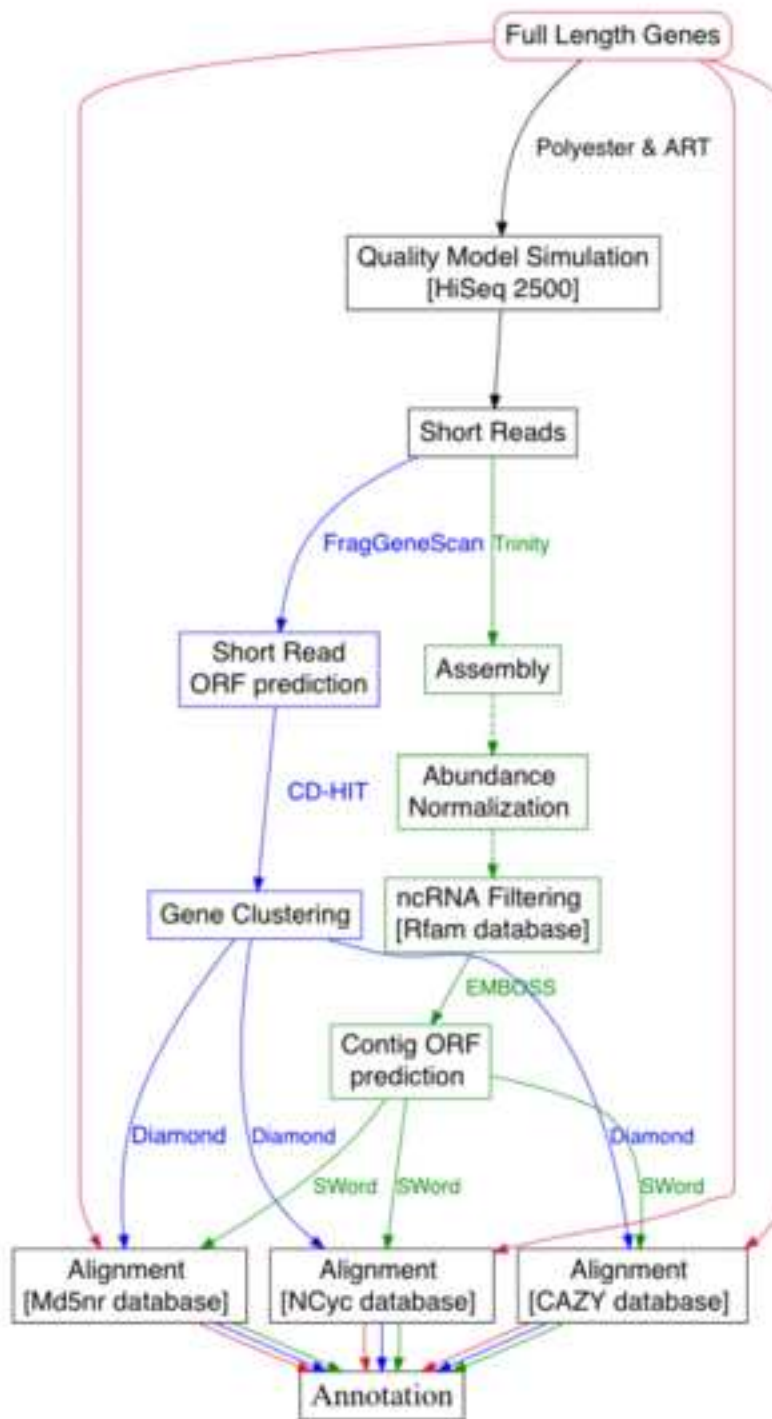

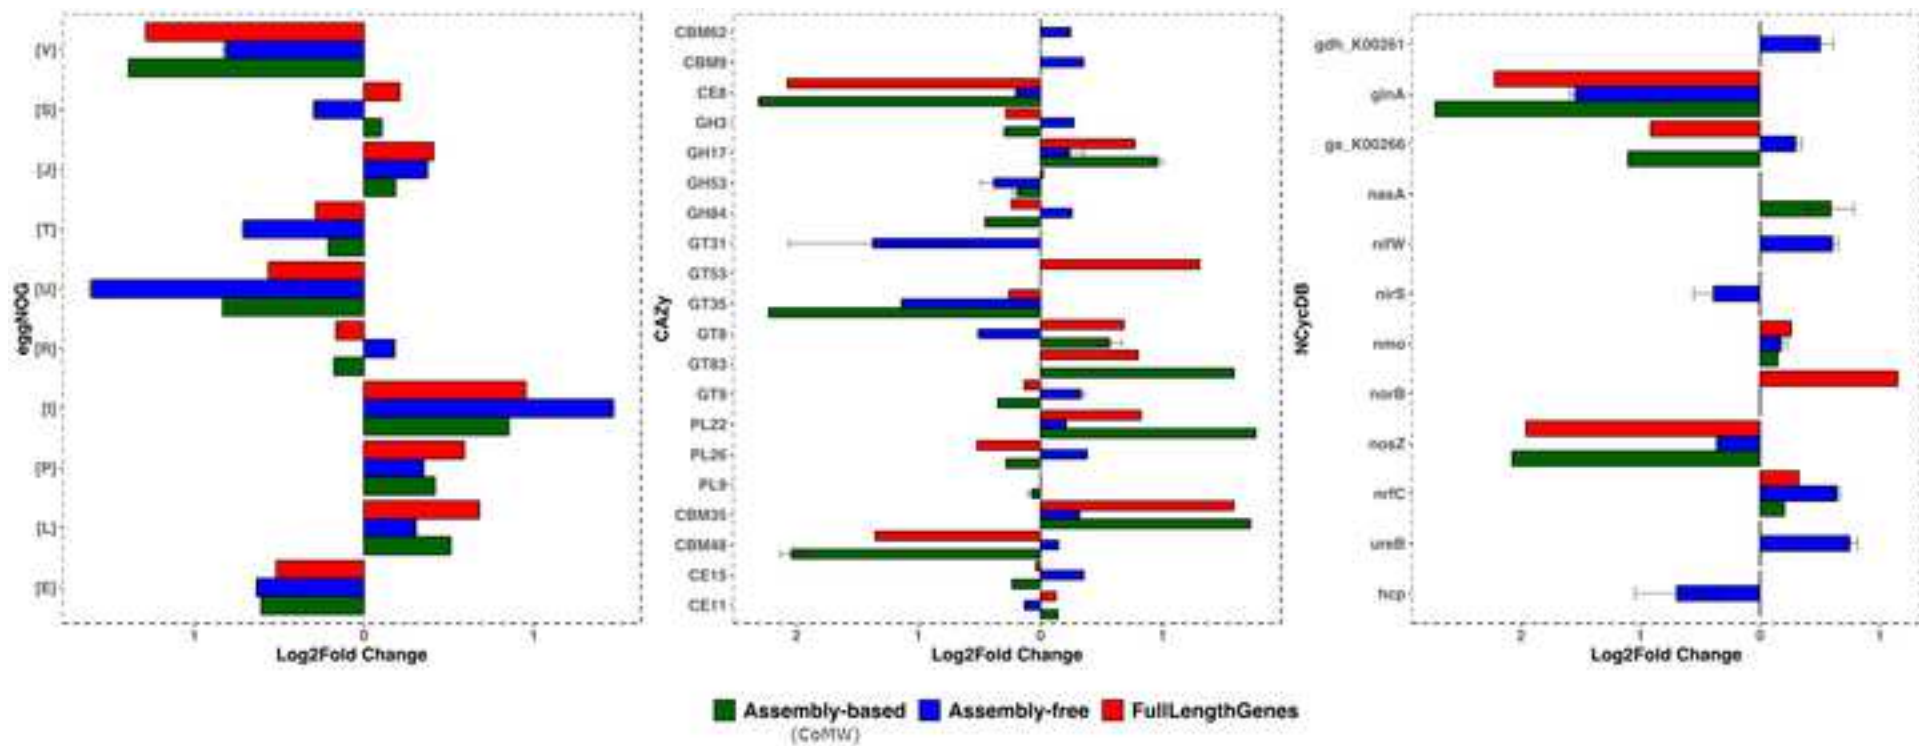



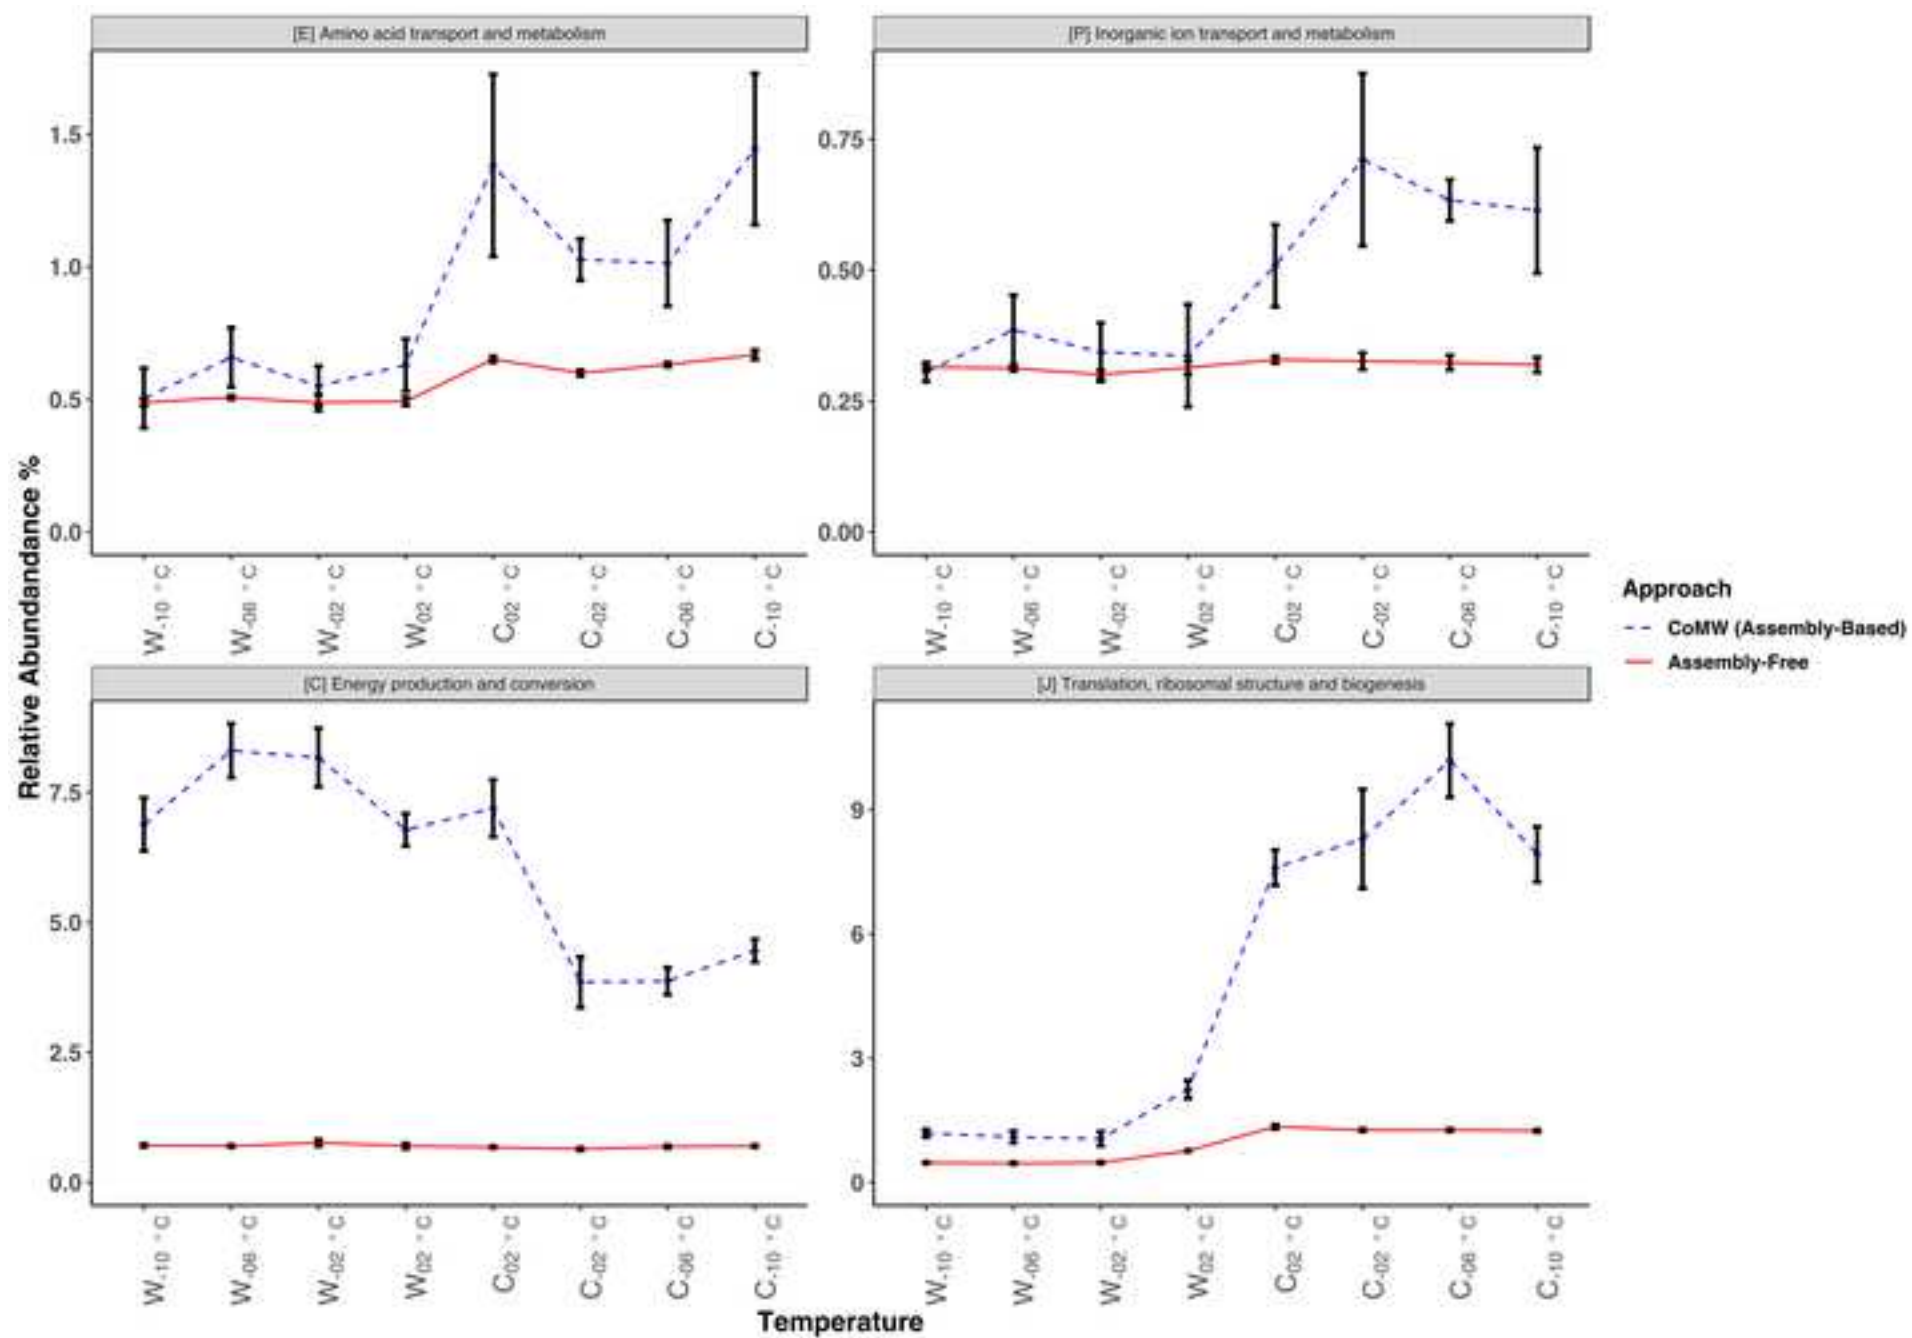

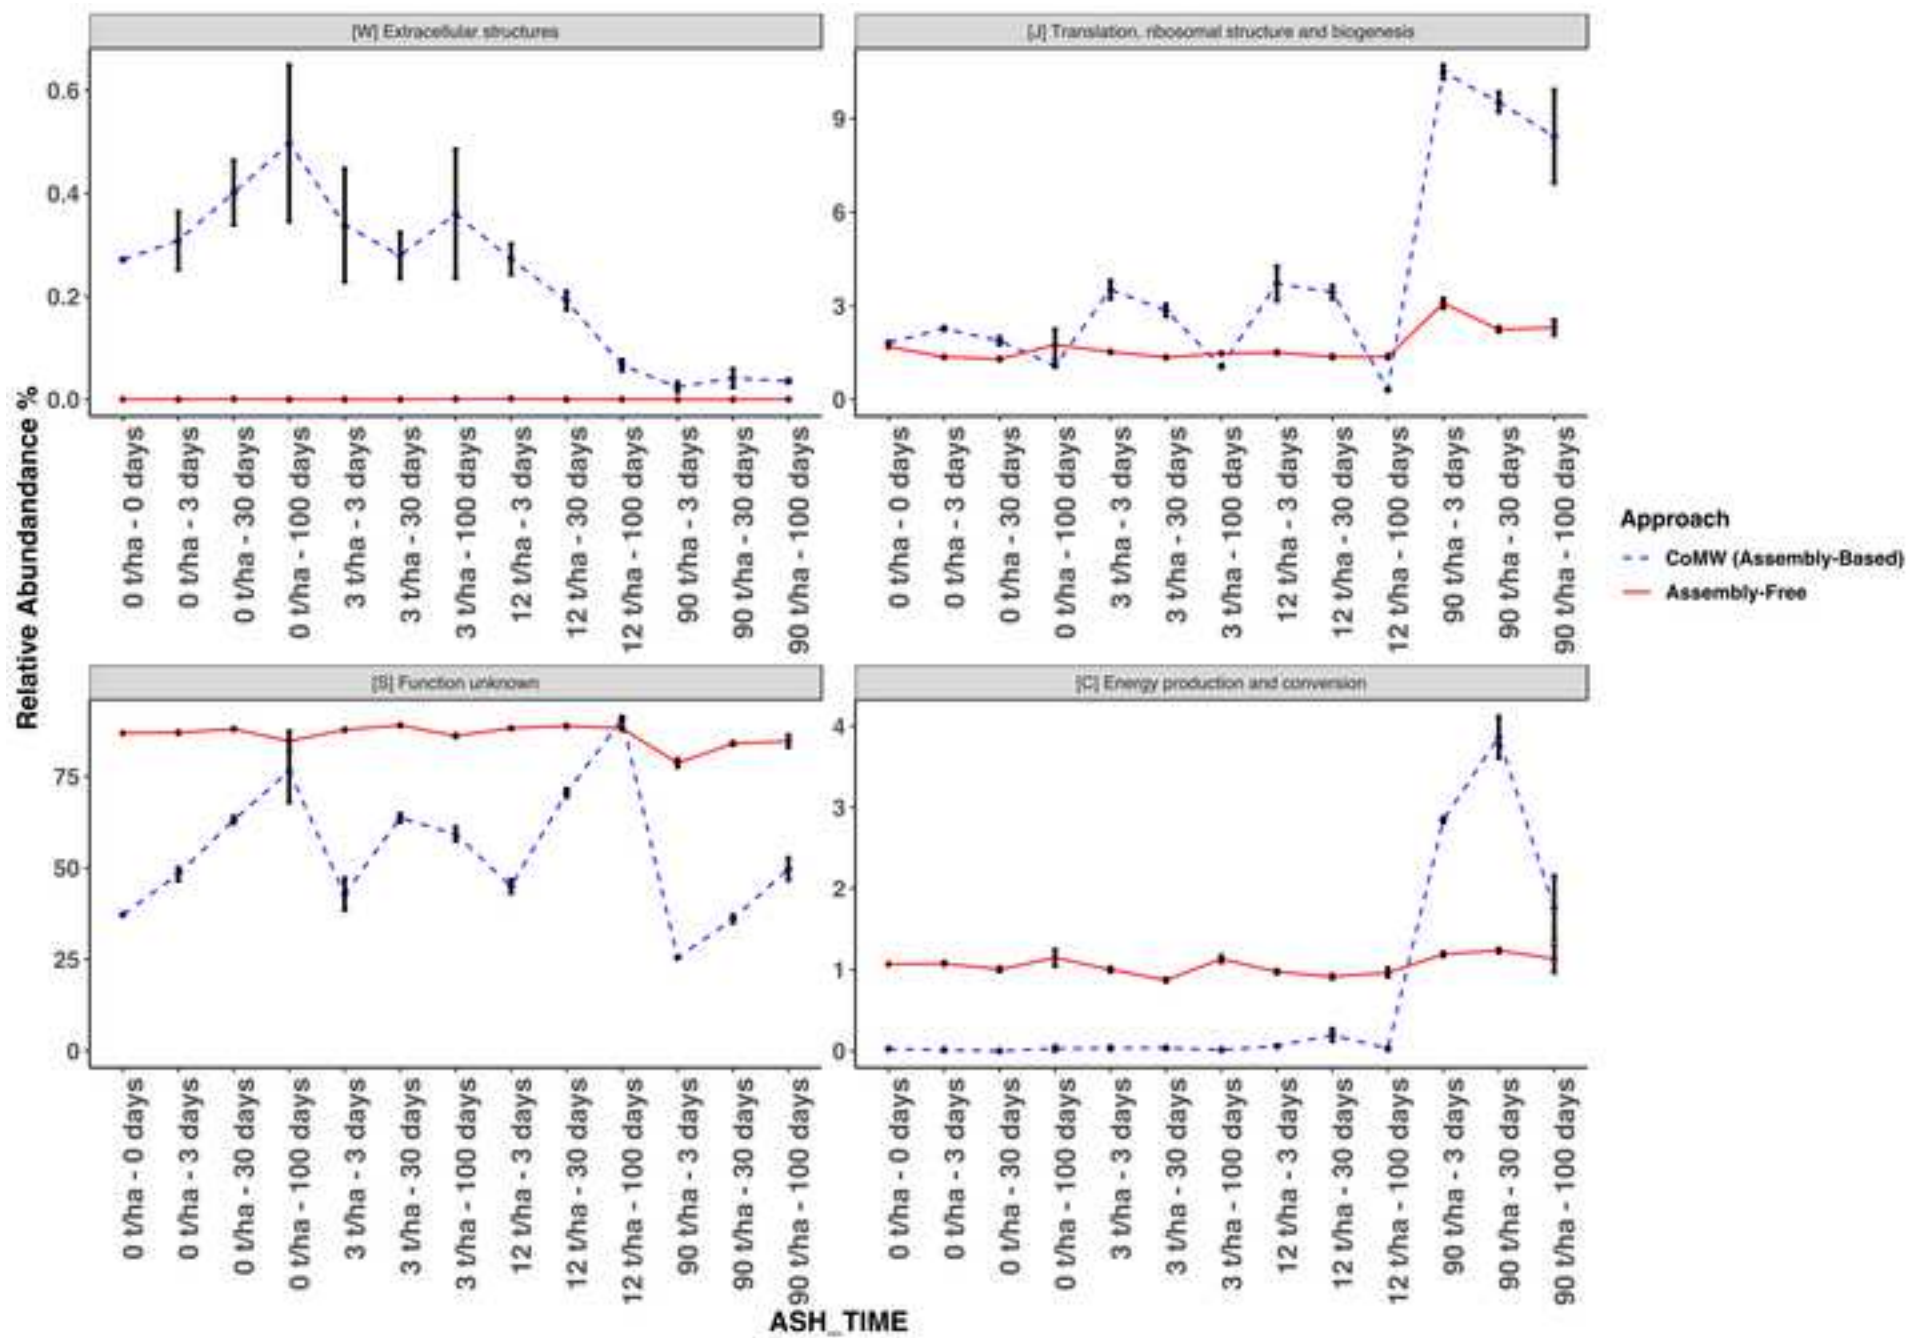

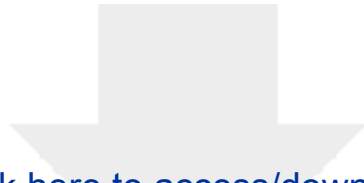

[Click here to access/download](#)

**Supplementary Material**

SupplementaryFile1\_PrecisionRecall.docx

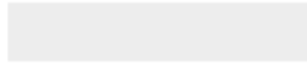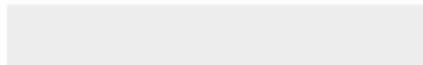



[Click here to access/download](#)

**Supplementary Material**

[SupplementaryFile2\\_eggNOG\\_DEAnalysis.xlsx](#)

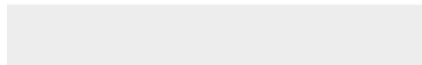



[Click here to access/download](#)

**Supplementary Material**

[SupplementaryFile3\\_CAzy\\_DEAnalysis.xlsx](#)

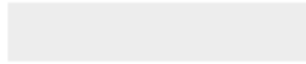



[Click here to access/download](#)

**Supplementary Material**

[SupplementaryFile4\\_NCyC\\_DEAnalysis.xlsx](#)



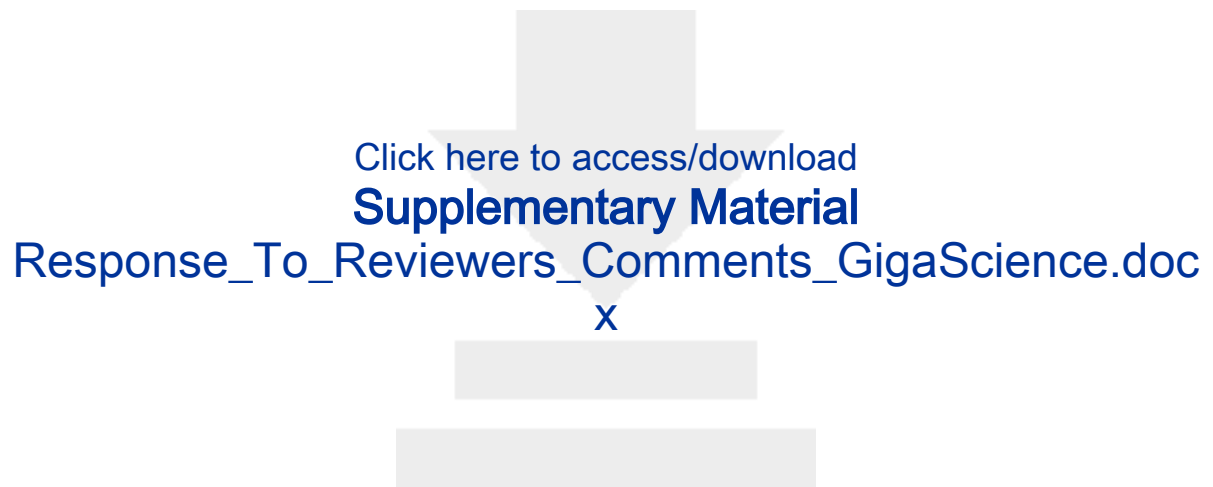

To: Editor, *GigaScience*

Re: Submission of a revised-manuscript GIGA-D-19-00009 to *GigaScience* in response to review received on 26 February 2019

We thank the editor and the reviewers for all the comments and the time and effort that have put into our submission. We believe that they provided huge guidance for improving the manuscript and reproducibility of this study and thus we have attempted to address every comment and provide responses in tabular form, please see attached. We have agreed to most of the concerns raised by the reviewers and have addressed them individually but we also have replied reasons where we feel the response is currently out of scope of the study.

In response to the major concerns that were summarized from the reviewers' comments we have spent significant efforts to firstly, make CoMW workflow easy to install and use with the anaconda configuration file provided, details of which are addressed in the response file. Secondly, in response to a healthy feedback from the reviewers we have also restructured the manuscript which we believe has improved the clarity and cohesion of the manuscript for readers of *GigaScience*.

Additionally, we have also spent considerable effort on improving data availability, reproducibility and dissemination of our results. We have made a supplementary GitHub repository as suggested by the reviewer 2 to include the scripts and parameters used by in benchmarking and generation of simulated data. As suggested we have also published CoMW as peer-reviewed compute capsule at oceancode and registered at scicrunch.org. Please see in the data availability below.

Finally, we have also made the manuscripts cited as under-review available at BioRxiv as pre-prints as asked by the editor and reviewers. This will further increase the understanding of real-world metatranscriptomes used in this manuscript and as pointed out by the Reviewer 2, detailed results and analyses of these metatranscriptomes is also available for the readers which further signifies our commitment to open and reproducible research.

Lastly, we have addressed all major and minor revision points in the manuscript and with the improvements and restructuring done we believe that the attached revised manuscript along with the Comparative Metatranscriptomics Workflow (CoMW) will be an appropriate for readers of *GigaScience*. We can

Environmental  
microbiology &  
biotechnology

Muhammad Zohaib Anwar  
PhD Student

Date: 15 May 2019

E-mail:  
mzanwar@envs.au.dk  
Web:  
au.dk/en/mzanwar@envs

Sender's CVR no.:  
31119103

Page 1/2

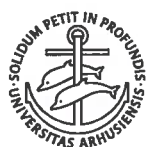

Environmental microbiology &  
biotechnology  
Aarhus University  
Frederiksborgvej 399  
PO box 358  
DK-4000 Roskilde  
Denmark

Tel.: +45 8715 0000  
Fax: +45 8715 5010  
E-mail: envs@au.dk  
Web: envs.au.dk/en



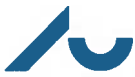

confirm this manuscript presents material that has not previously been published and is not under consideration for publication elsewhere and all authors have seen and approved the revised version submitted.

Data availability:

- Raw sequence data generated using simulation of full-length genes were deposited in the NCBI Sequence Read Archive and are accessible through BioProject accession number PRJNA509064
- Project home page: <https://github.com/anwarMZ/CoMW>
- Project supplementary scripts: [https://github.com/anwarMZ/CoMW\\_supp](https://github.com/anwarMZ/CoMW_supp)
- CoMW is published as a per-reviewed compute capsule at oceancode <https://doi.org/10.24433/CO.1793842.v1>
- Scicrunch RRID - SCR\_017109

Once again, we would like to thank you for considering our manuscript in *GigaScience*. Please do not hesitate to contact us, should you have further questions.

Best regards,  
on behalf of all authors

A handwritten signature in blue ink, appearing to read 'Zohaib Anwar'.

Muhammad Zohaib Anwar
