# Supplementary material for: To assemble or not to resemble—A validated Comparative Metatranscriptomics Workflow (CoMW)
Source: PubMed Central journal article supplement (PMC6667343; doi:10.1093/gigascience/giz096), 2019-07-30
Supplement: giz096_response_to_reviewer_comments_revision_1.pdf [file giz096_response_to_reviewer_comments_revision_1.pdf]

## Author's Response To Reviewer Comments

Close

As asked by the editor, I have added the reference to the GigaDB dataset attached to the publication and cited it in text

Close
